# Supplementary material for: Photoinduced decarbonylative borylation of alkyl aldehydes through 4-alkyl-1,4-dihydropyridines
Source: Royal Society of Chemistry journal article supplement (doi:10.1039/d3qo01139a), 2023-12-20

*Supporting Information*

## **Photoinduced Decarbonylative Borylation of Alkyl Aldehyde through 4-Alkyl-1,4-Dihydropyridines**

Chang Lian,<sup>a,b</sup> Jianning Zhang,<sup>a,b</sup> Fanyang Mo<sup>a,\*</sup>

<sup>a</sup> School of Materials Science and Engineering, Peking University, Beijing 100871, PR China.

<sup>b</sup> College of Engineering, Peking University, Beijing 100871, PR China.

\*Email: Fanyang Mo: [fmo@pku.edu.cn](mailto:fmo@pku.edu.cn).

---

## Content

|     |                                                                                                                               |    |
|-----|-------------------------------------------------------------------------------------------------------------------------------|----|
| 1   | General procedures .....                                                                                                      | 2  |
| 1.1 | General procedure for the preparation of Hantzsch esters .....                                                                | 3  |
| 1.2 | General procedure for alkyl borylation reactions.....                                                                         | 8  |
| 1.3 | General procedure for gram-scale borylation reactions .....                                                                   | 9  |
| 1.4 | General procedure for oxidation of borylation products .....                                                                  | 10 |
| 1.5 | General procedure for gram-scale borylation reactions .....                                                                   | 11 |
|     | Spectra data for Hantzsch esters and borylation products.....                                                                 | 13 |
| 2   | Additional mechanism explorations.....                                                                                        | 27 |
|     | Scheme S1. DFT calculated Gibbs energy change of the reaction between cyclohexyl radical and different diboron reagents. .... | 27 |
|     | Scheme S2. The pre-conversion of this borylation reaction from (a) esters and (b) lactones. ....                              | 28 |
|     | Scheme S3. The control experiment of reaction time. ....                                                                      | 28 |
|     | Scheme S4. DFT calculated redox potentials. ....                                                                              | 28 |
|     | Scheme S5. Mass spectrometry of the reaction systems. ....                                                                    | 29 |
|     | Scheme S6. The spin density of 6. ....                                                                                        | 29 |
| 3   | DFT calculations .....                                                                                                        | 29 |
|     | Table S1. Energies and lowest frequencies.....                                                                                | 30 |
|     | Table S2. Energies and lowest frequencies (Scheme S4). ....                                                                   | 30 |
|     | Table S3. TD-DFT energies (Scheme 6b). ....                                                                                   | 31 |
|     | Cartesian coordinates of the structures .....                                                                                 | 31 |
| 4   | References .....                                                                                                              | 63 |
|     | <sup>1</sup> H, <sup>13</sup> C and <sup>19</sup> F NMR spectra of the prepared compounds.....                                | 65 |

## 1 General procedures

B<sub>2</sub>cat<sub>2</sub> and *fac*-Ir(ppy)<sub>3</sub> were purchased from Energy Chemical. Hantzsch esters were prepared from corresponding alkyl aldehydes. All solvents were purchased from J&K Scientific and stored in a nitrogen-filled glovebox. The 200-300 mesh silica gels for the chromatography (from Qingdao, China) were used to purified organic compounds. <sup>1</sup>H NMR (400 MHz) and <sup>13</sup>C NMR (100 MHz) spectra were measured on Bruker-400 spectrometer. Chemical shifts were reported in ppm using

tetramethylsilane (TMS) as the internal standard. Infrared spectra were recorded on a Thermal Fisher Nicolet iS50 Fourier transform infrared spectrometer (FT-IR) and reported in wave numbers,  $\text{cm}^{-1}$ . For HRMS data, Fourier transform ion cyclotron resonance mass spectrometer was used. GC-MS and FID data were measured using the Agilent Technologies 7890B GC and the Agilent Technologies 5977B MSD.

### 1.1 General procedure for the preparation of Hantzsch esters

Synthesized Hantzsch esters **1**:

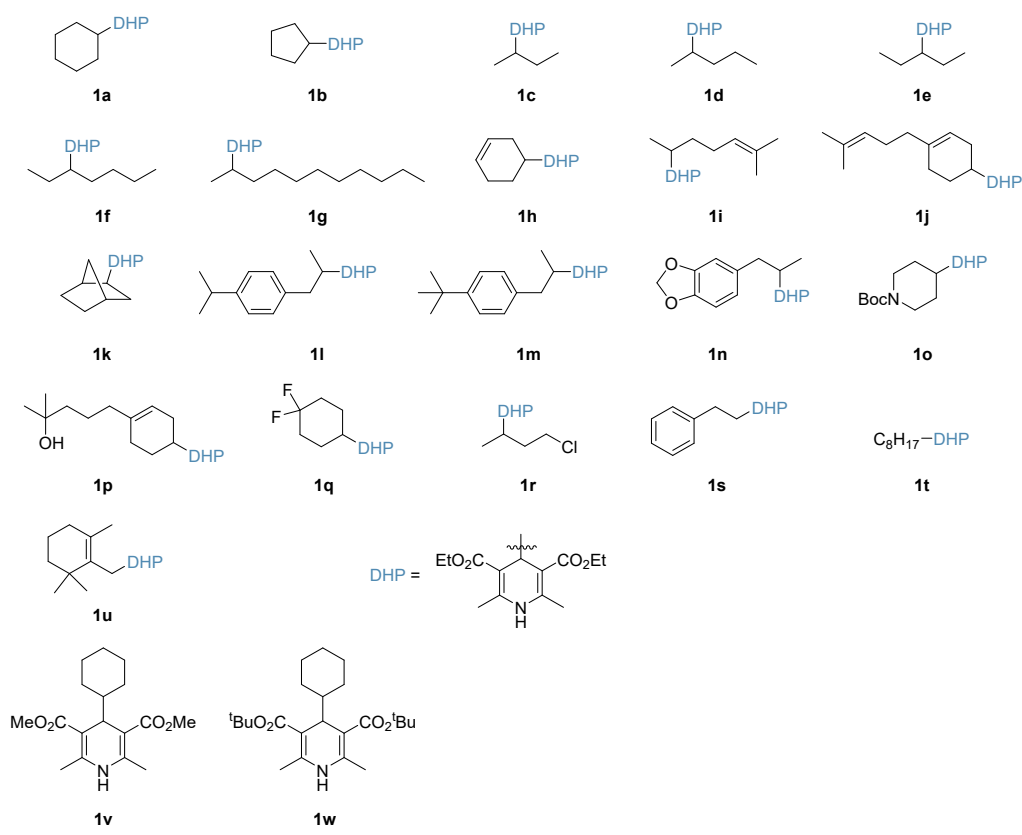

Preparation of Hantzsch esters from corresponding alkyl aldehydes (**1a-1j**, **1l-1p**, **1s-1u**).<sup>1</sup>

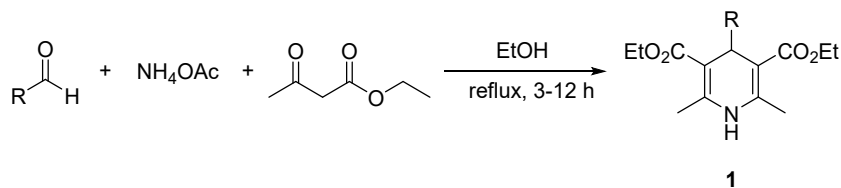

*General procedure I:* In a round-bottom flask, ammonium acetate (10 mmol, 1.0 equiv., 0.77 g) and ethanol (2.5 M) was added. Next, ethyl acetoacetate (20 mmol, 2.0 equiv., 2.60 g) was added followed

by alkyl aldehyde (10 mmol, 1.0 equiv.) in one portion. The reaction system was refluxed at 80 °C for 3-12 hours. When reaction was accomplished, the mixture of brine and dichloromethane were added and the layers were separated. The aqueous layer was extracted with dichloromethane for 3 times. The combined organic layers were dried over Na<sub>2</sub>SO<sub>4</sub>, filtered, and concentrated *in vacuo*. The crude product was purified by column chromatography with PE/EA (15:1-3:1) to obtain the corresponding alkyl substituted Hantzsch esters.

### Synthesis of Hantzsch ester 1k

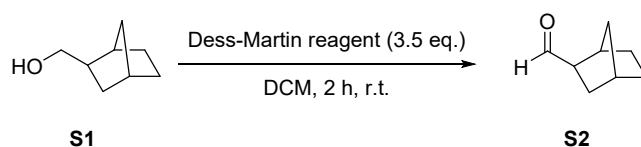

### Bicyclo[2.2.1]heptane-2-carbaldehyde (**S2**)

In a round-bottom flask, bicyclo[2.2.1]heptan-2-ylmethanol (**S1**, 4 mmol, 1.0 equiv., 0.5 g) and Dess-Martin periodinane (35 mmol, 3.5 equiv., 5.9 g) were added. Next, dichloromethane (DCM, 0.1 M) was added in one portion. The reaction system was stirred at room temperature for 2 hours. When reaction was accomplished, the reaction was quenched with saturated NaHCO<sub>3</sub> aqueous solution. Then, the mixture of brine and dichloromethane were added and the layers were separated. The combined organic layers were dried over MgSO<sub>4</sub>, filtered, and concentrated *in vacuo*. The crude product was purified by column chromatography with PE/EA (30:1-10:1) to obtain aldehyde **S2** (0.40 g, 60%) as colorless oil.<sup>2</sup>

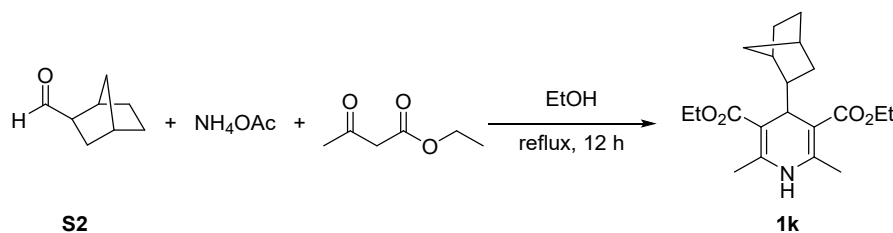

### Diethyl 4-(bicyclo[2.2.1]heptan-2-yl)-2,6-dimethyl-1,4-dihydropyridine-3,5-dicarboxylate (**1k**)

**1k** was synthesized according to General Procedure I using **S2** (2.4 mmol, 1.0 equiv., 0.30 g), ammonium acetate (2.4 mmol, 1.0 equiv., 0.18 g), ethanol (2.5 M) and ethyl acetoacetate (4.8 mmol, 2.0 equiv., 0.62 g), with a stirring at 80 °C for 12 hours. The crude product was purified by column chromatography with PE/EA (15:1-3:1) to obtain Hantzsch ester **1k** (0.26 g, 31%) as white solid.

### Synthesis of Hantzsch ester 1q

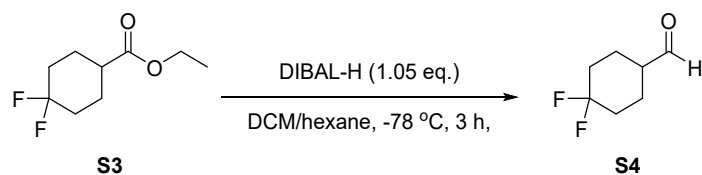

#### 4,4-Difluorocyclohexane-1-carbaldehyde (**S4**)

DIBAL-H (5.3 mL, 1 mol/L in hexane) was slowly added to the solution of ethyl 4,4-difluorocyclohexane-1-carboxylate (**S3**, 5 mmol, 1.0 equiv., 0.96 g) in a mixture of dichloromethane (12 mL) and hexane (12 mL) at -78 °C. The reaction system was stirred at the same temperature for 3 hours. Then, Et<sub>2</sub>O (10 mL) and water (6 mL) were added to the reaction at 0 °C. The mixture was stirred for 30 minutes at room temperature, and then filtered through Celite. The organic layer was dried over Na<sub>2</sub>SO<sub>4</sub>, filtered, and concentrated *in vacuo*. The crude product **S4** could be used in next step without further purification.<sup>3</sup>

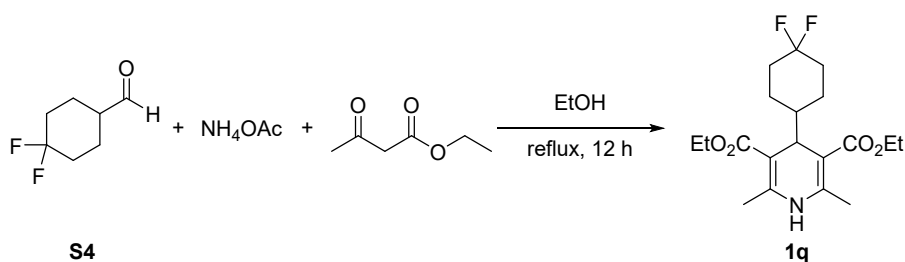

#### Diethyl 4-(4,4-difluorocyclohexyl)-2,6-dimethyl-1,4-dihydropyridine-3,5-dicarboxylate (**1q**)

**1q** was synthesized according to General Procedure I using **S4** (5 mmol, 1.0 equiv., 0.74 g), ammonium acetate (5 mmol, 1.0 equiv., 0.39 g), ethanol (2.5 M) and ethyl acetoacetate (10 mmol, 2.0 equiv., 1.30 g), with a stirring at 80 °C for 12 hours. The crude product was purified by column chromatography with PE/EA (15:1-3:1) to obtain Hantzsch ester **1k** (0.22 g, 12%) as white solid.

#### Synthesis of Hantzsch ester **1r**

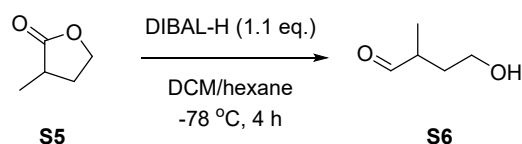

#### 4-Hydroxy-2-methylbutanal (**S6**)

DIBAL-H (21 mL, 1 mol/L in hexane) was slowly added to the solution of 3-methyldihydrofuran-2(3*H*)-one (**S5**, 20 mmol, 1.0 equiv., 2.0 g) in a mixture of dichloromethane (50 mL) and hexane (50 mL) at -78 °C. The reaction system was stirred at the same temperature for 3 hours. Then, Et<sub>2</sub>O (40

mL) and water (20 mL) were added to the reaction at 0 °C. The mixture was stirred for 30 minutes at room temperature, and then filtered through Celite. The organic layer was dried over Na<sub>2</sub>SO<sub>4</sub>, filtered, and concentrated *in vacuo*. The crude product **S6** could be used in next step without further purification.<sup>4</sup>

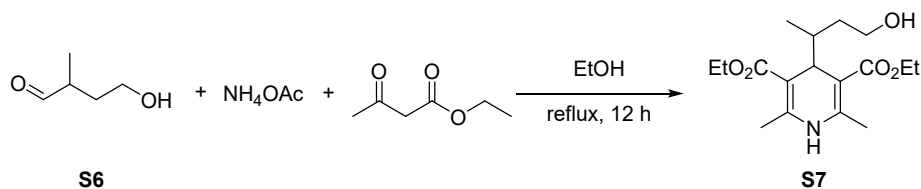

Diethyl 4-(4-hydroxybutan-2-yl)-2,6-dimethyl-1,4-dihydropyridine-3,5-dicarboxylate (**S7**)

**S7** was synthesized according to General Procedure I using **S6** (20 mmol, 1.0 equiv., 2.04 g), ammonium acetate (20 mmol, 1.0 equiv., 1.54 g), ethanol (2.5 M) and ethyl acetoacetate (40 mmol, 2.0 equiv., 5.2 g), with a stirring at 80 °C for 12 hours. The crude product was purified by column chromatography with PE/EA (15:1-3:1) to obtain Hantzsch ester **S7** (1.47 g, 23%) as yellow oil.<sup>4</sup>

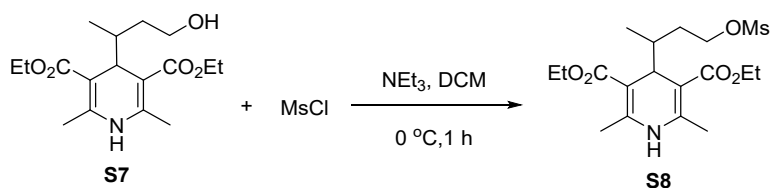

Diethyl 2,6-dimethyl-4-(4-((methylsulfonyl)oxy)butan-2-yl)-1,4-dihydropyridine-3,5-dicarboxylate (**S8**)

In a 100 mL Schlenk tube, **S7** (8 mmol, 1.0 equiv., 816 mg), triethylamine (10.4 mmol, 1.3 equiv., 1.5 mL) and dichloromethane (20 mL) were added in one portion under N<sub>2</sub> atmosphere. In the ice bath, reaction mixture was added methanesulfonyl chloride (10.4 mmol, 1.3 equiv., 0.8 mL) dropwise and stirred at 0 °C for 1 hour. Then 2 M NH<sub>4</sub>Cl aqueous solution (20 mL) was added and the mixture was extracted with dichloromethane. The combined organic layers were dried over Na<sub>2</sub>SO<sub>4</sub>, filtered, and concentrated *in vacuo*. The crude product **S8** could be used in next step without further purification.<sup>4</sup>

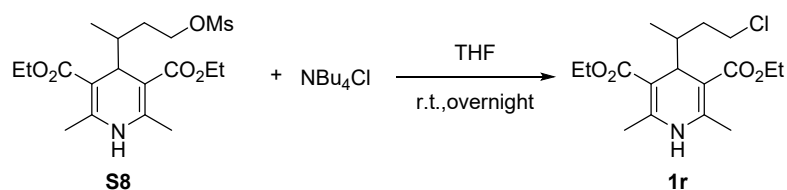

#### Diethyl 4-(4-chlorobutan-2-yl)-2,6-dimethyl-1,4-dihydropyridine-3,5-dicarboxylate (**1r**)

In a round-bottom flask, **S8** (1 mmol, 1.0 equiv., 403 mg) and  $\text{NBu}_4\text{Cl}$  (1.5 mmol, 1.5 equiv., 417 mg) were stirred in tetrahydrofuran (THF, 5 mL) at room temperature overnight. The reaction mixture was directly purified by column chromatography with PE/EA (20:1-1:1) to obtain Hantzsch ester **1r** (0.21 g, 60%) as yellow oil.

#### Synthesis of Hantzsch ester **1v**

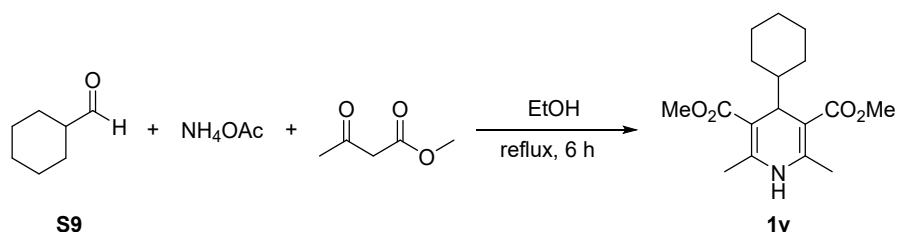

#### Dimethyl 4-cyclohexyl-2,6-dimethyl-1,4-dihydropyridine-3,5-dicarboxylate (**1v**)

In a round-bottom flask, ammonium acetate (10 mmol, 1.0 equiv., 0.77 g) and ethanol (2.5 M) was added. Next, methyl acetoacetate (20 mmol, 2.0 equiv., 2.32 g) was added followed by cyclohexanecarboxaldehyde (**S9**, 10 mmol, 1.0 equiv., 1.12 g) in one portion. The reaction system was refluxed at 80 °C for 6 hours. When reaction was accomplished, the mixture of brine and dichloromethane were added and the layers were separated. The aqueous layer was extracted with dichloromethane for 3 times. The combined organic layers were dried over  $\text{Na}_2\text{SO}_4$ , filtered, and concentrated *in vacuo*. The crude product was purified by column chromatography with PE/EA (15:1-3:1) to obtain Hantzsch ester **1v** (1.81 g, 59%) as white solid.

#### Synthesis of Hantzsch ester **1w**

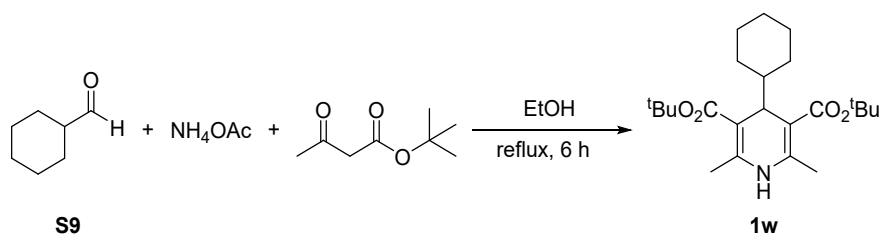

## Di-tert-butyl 4-cyclohexyl-2,6-dimethyl-1,4-dihydropyridine-3,5-dicarboxylate (**1w**)

In a round-bottom flask, ammonium acetate (10 mmol, 1.0 equiv., 0.77 g) and ethanol (2.5 M) was added. Next, *tert*-butyl acetoacetate (20 mmol, 2.0 equiv., 3.16 g) was added followed by cyclohexanecarboxaldehyde (**S9**, 10 mmol, 1.0 equiv., 1.12 g) in one portion. The reaction system was refluxed at 80 °C for 6 hours. When reaction was accomplished, the mixture of brine and dichloromethane were added and the layers were separated. The aqueous layer was extracted with dichloromethane for 3 times. The combined organic layers were dried over Na<sub>2</sub>SO<sub>4</sub>, filtered, and concentrated *in vacuo*. The crude product was purified by column chromatography with PE/EA (15:1-3:1) to obtain Hantzsch ester **1w** (0.56 g, 14%) as white solid.

### 1.2 General procedure for alkyl borylation reactions

Reaction equipment:

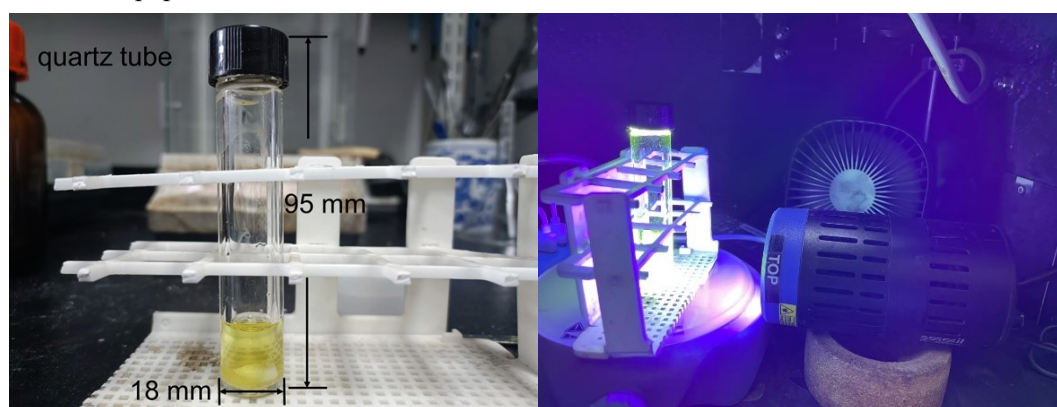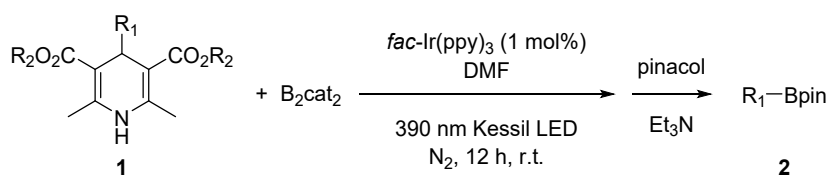

In glove box, alkyl-substituted Hantzsch esters (**1**, 0.3 mmol, 1.0 equiv.), B<sub>2</sub>cat<sub>2</sub> (1.2 mmol, 4.0 equiv., 286 mg) and *fac*-Ir(ppy)<sub>3</sub> (0.003 mmol, 1 mol %, 2 mg) were weighed in a 10 mL quartz reaction tube. *N,N*-Dimethylformamide (DMF, 0.1 M, 3 mL) was added in succession. The reaction system was stirred under N<sub>2</sub> atmosphere and irradiated with Kessil 390 nm LED (40 W, 3 cm away from the vial) 12 hours at room temperature. When reaction was accomplished, pinacol (2.4 mmol, 8.0



equiv., 283 mg) and 1.0 mL triethylamine were added, and the mixture was stirred at room temperature for 1 hour. The mixture of brine and ethyl acetate (20 mL) were added to the reaction system and the layers were separated. The aqueous layer was extracted with ethyl acetate for 3 times. The combined organic layers were dried over Na<sub>2</sub>SO<sub>4</sub>, filtered, and concentrated *in vacuo*. The crude product was purified by column chromatography with PE/EA (100:1-10:1) to obtain borylated products **2** as colorless oil.

### 1.3 General procedure for gram-scale borylation reactions

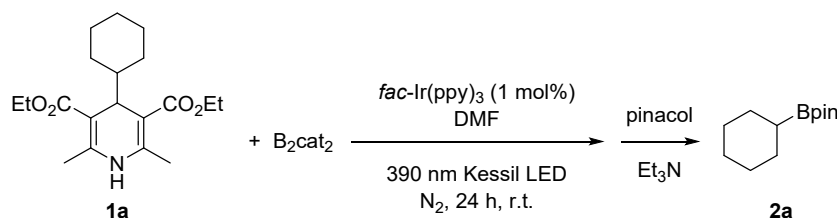

In glove box, diethyl 4-cyclohexyl-2,6-dimethyl-1,4-dihydropyridine-3,5-dicarboxylate (**1a**, 8 mmol, 1.0 equiv., 2.68 g), B<sub>2</sub>cat<sub>2</sub> (32 mmol, 4.0 equiv., 7.62 g) and *fac*-Ir(ppy)<sub>3</sub> (0.08 mmol, 1 mol %, 52 mg) were weighed in a 50 mL quartz reaction tube. *N,N*-Dimethylformamide (0.27 M, 30 mL) was added in succession. The reaction system was stirred under N<sub>2</sub> atmosphere and irradiated with two Kessil 390 nm LEDs (40 W, 5 cm away from the vial) 24 hours at room temperature. When reaction was accomplished, pinacol (64 mmol, 8.0 equiv., 7.55 g) and 30 mL triethylamine were added, and the mixture was stirred at room temperature for 3 hours. The mixture of brine and ethyl acetate (80 mL) were added and the layers were separated. The aqueous layer was extracted with ethyl acetate for 3 times. The combined organic layers were dried over Na<sub>2</sub>SO<sub>4</sub>, filtered, and concentrated *in vacuo*. The crude product was purified by column chromatography with PE/EA (100:1-10:1) to obtain borylated products **2a** in 65% isolated yield (1.09 g) as colorless oil.

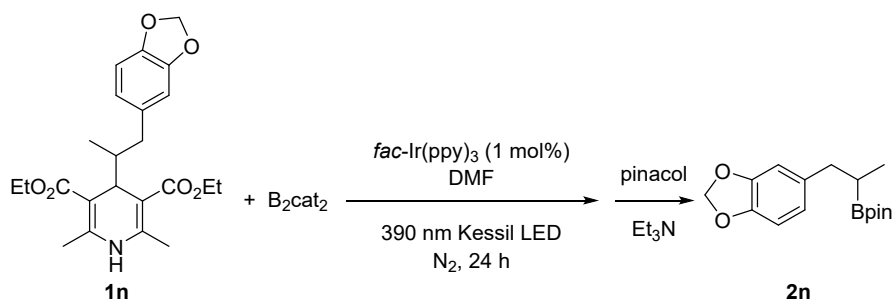

In glove box, diethyl 4-(1-(benzo[d][1,3]dioxol-5-yl)propan-2-yl)-2,6-dimethyl-1,4-dihydropyridine-3,5-dicarboxylate (**1n**, 5 mmol, 1.0 equiv., 2.08 g),  $B_2cat_2$  (20 mmol, 4.0 equiv., 4.76 g) and  $fac-Ir(ppy)_3$  (0.05 mmol, 1 mol %, 33 mg) were weighed in a 50 mL quartz reaction tube. *N,N*-Dimethylformamide (0.25 M, 20 mL) was added in succession. The reaction system was stirred under  $N_2$  atmosphere and irradiated with two Kessil 390 nm LEDs (40 W, 5 cm away from the vial) 24 hours at room temperature. When reaction was accomplished, pinacol (40 mmol, 8.0 equiv, 4.72 g) and 20 mL triethylamine were added, and the mixture was stirred at room temperature for 3 hours. The mixture of brine and ethyl acetate (50 mL) were added and the layers were separated. The aqueous layer was extracted with ethyl acetate for 3 times. The combined organic layers were dried over  $Na_2SO_4$ , filtered, and concentrated *in vacuo*. The crude product was purified by column chromatography with PE/EA (50:1-10:1) to obtain borylated products **2n** in 52% isolated yield (0.73 g) as colorless oil.

#### 1.4 General procedure for oxidation of borylation products

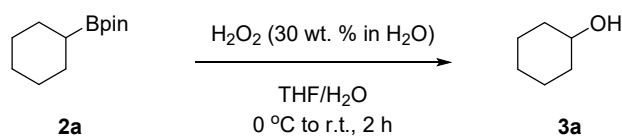

In a round-bottom flask, 2-cyclohexyl-4,4,5,5-tetramethyl-1,3,2-dioxaborolane (**2a**, 1 mmol, 210 mg), tetrahydrofuran (8 mL) and 3 M NaOH aqueous solution (5 mL) were added in on portion. In the ice bath,  $H_2O_2$  (30 wt. % in  $H_2O$ , 5 mL) was added dropwise. Then the mixture warmed up to room temperature and reacted for 2 hours.  $Na_2S_2O_3$  saturated aqueous solution (20 mL) was added to the reaction system dropwise at 0 °C, and the mixture heated up to room temperature and reacted for 30 minutes. When reaction was accomplished, ethyl acetate (20 mL) was added and the layers

were separated. The organic layers were dried over  $\text{MgSO}_4$ , filtered, and concentrated *in vacuo*. The crude product was purified by column chromatography with PE/EA (10:1-3:1) to obtain cyclohexanol **3** in 58% isolated yield as colorless oil.

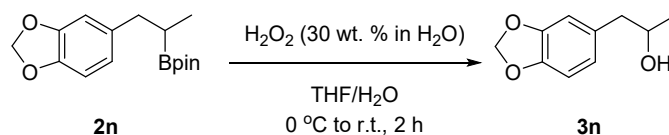

In a round-bottom flask, 2-(1-(benzo[*d*][1,3]dioxol-5-yl)propan-2-yl)-4,4,5,5-tetramethyl-1,3,2-dioxaborolane (**2n**, 1 mmol, 290 mg), tetrahydrofuran (8 mL) and 3 M NaOH aqueous solution (5 mL) were added in on portion. In the ice bath,  $\text{H}_2\text{O}_2$  (30 wt. % in  $\text{H}_2\text{O}$ , 5 mL) was added dropwise. Then the mixture warmed up to room temperature and reacted for 2 hours.  $\text{Na}_2\text{S}_2\text{O}_3$  saturated aqueous solution (20 mL) was added to the reaction system dropwise at  $0\text{ }^\circ\text{C}$ , and the mixture heated up to room temperature and reacted for 30 minutes. When reaction was accomplished, ethyl acetate (20 mL) was added and the layers were separated. The organic layers were dried over  $\text{MgSO}_4$ , filtered, and concentrated *in vacuo*. The crude product was purified by column chromatography with PE/EA (10:1-1:1) to obtain 1-(benzo[*d*][1,3]dioxol-5-yl)propan-2-ol **4** in 74% isolated yield as colorless oil.

### 1.5 General procedure for gram-scale borylation reactions

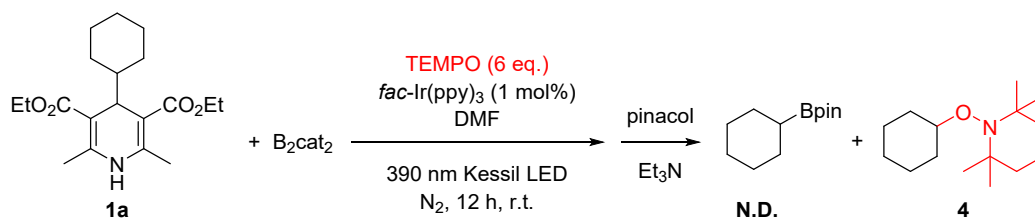

In glove box, Hantzsch esters **1a** (0.3 mmol, 1.0 equiv.),  $\text{B}_2\text{cat}_2$  (1.2 mmol, 4.0 equiv., 286 mg), *fac*- $\text{Ir(ppy)}_3$  (0.003 mmol, 1 mol %, 2 mg) and TEMPO (1.8 mmol, 6.0 equiv., 281 mg) were weighed in a 10 mL quartz reaction tube. Then *N,N*-dimethylformamide (0.1 M, 3 mL) was added in succession. The reaction system was stirred under  $\text{N}_2$  atmosphere and irradiated with Kessil 390 nm LED (40 W, 3 cm away from the vial) 12 hours at room temperature. When reaction was accomplished, pinacol (2.4 mmol, 8.0 equiv., 283 mg) and 1.0 mL triethylamine were added, and the mixture was

---

stirred at room temperature for 1 hour. The mixture of brine and ethyl acetate (20 mL) were added to the reaction system and the layers were separated. The aqueous layer was extracted with ethyl acetate for 3 times. The combined organic layers were dried over Na<sub>2</sub>SO<sub>4</sub>, filtered, and concentrated *in vacuo*. The reaction system was detected by GC-MS. The result shown that no borylation product was formed and radical trapping product **4** was observed. The crude product was purified by column chromatography with PE/EA (30:1-3:1) to obtain 1-(cyclohexyloxy)-2,2,6,6-tetramethylpiperidine **5** in 28% isolated yield (20 mg) as colorless oil.

**Diethyl 4-cyclohexyl-2,6-dimethyl-1,4-dihydropyridine-3,5-dicarboxylate (1a)<sup>5</sup>**

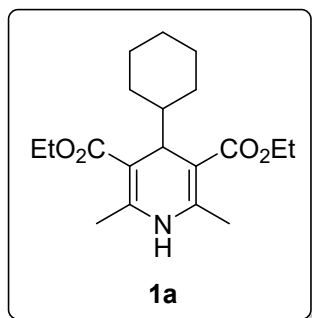

white solid. <sup>1</sup>H NMR (400 MHz, Chloroform-*d*):  $\delta$  5.53 (s, 1H), 4.26-4.10 (m, 4H), 3.92 (d,  $J = 5.7$  Hz, 1H), 2.30 (s, 6H), 1.65 (d,  $J = 6.2$  Hz, 2H), 1.54 (d,  $J = 12.3$  Hz, 3H), 1.30 (t,  $J = 7.1$  Hz, 6H), 1.08 (t,  $J = 8.9$  Hz, 3H), 0.93 (t,  $J = 13.3$  Hz, 2H). <sup>13</sup>C NMR (101 MHz, Chloroform-*d*)  $\delta$  168.7, 144.4, 101.9, 59.6, 45.8, 38.4, 28.8, 26.7, 26.6, 19.4, 14.4.

**Diethyl 4-cyclopentyl-2,6-dimethyl-1,4-dihydropyridine-3,5-dicarboxylate (1b)<sup>6</sup>**

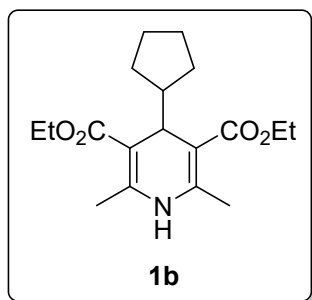

white solid. <sup>1</sup>H NMR (400 MHz, Chloroform-*d*):  $\delta$  5.67 (br, 1H), 4.26-4.11 (m, 4H), 4.00 (d,  $J = 7.2$  Hz, 1H), 2.30 (s, 6H), 1.78-1.68 (m, 1H), 1.66-1.54 (m, 2H), 1.52-1.45 (m, 2H), 1.43-1.37 (m, 2H), 1.30 (t,  $J = 7.1$  Hz, 6H), 1.21-1.11 (m, 2H). <sup>13</sup>C NMR (101 MHz, Chloroform-*d*)  $\delta$  168.6, 144.5, 102.9, 59.6, 48.2, 35.8, 28.4, 24.0, 19.5, 14.4.

**Diethyl 4-(sec-butyl)-2,6-dimethyl-1,4-dihydropyridine-3,5-dicarboxylate (1c)<sup>5</sup>**

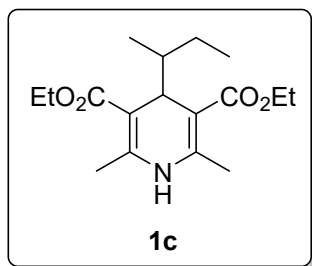

white solid. <sup>1</sup>H NMR (400 MHz, Chloroform-*d*):  $\delta$  5.61 (br, 1H), 4.26-4.09 (m, 4H), 4.02 (d,  $J = 4.3$  Hz, 1H), 2.29 (d,  $J = 2.4$  Hz, 6H), 1.36-1.27 (m, 8H), 1.00-0.93 (m, 1H), 0.85 (t,  $J = 7.1$  Hz, 3H), 0.72 (t,  $J = 6.8$  Hz, 3H). <sup>13</sup>C NMR (101 MHz, Chloroform-*d*)  $\delta$  169.0, 168.6, 144.8, 144.6, 102.2, 101.2, 59.6, 43.1, 37.5, 25.2, 19.3, 19.3,

14.7, 14.3, 14.3, 12.2.

**Diethyl 2,6-dimethyl-4-(pentan-2-yl)-1,4-dihydropyridine-3,5-dicarboxylate (1d)<sup>6</sup>**

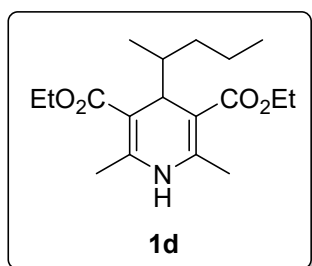

white solid. <sup>1</sup>H NMR (400 MHz, Chloroform-*d*):  $\delta$  5.88 (br, 1H), 4.26-4.11 (m, 4H), 4.01 (d,  $J = 4.5$  Hz, 1H), 2.29 (d,  $J = 3.7$  Hz, 6H),

1.47-1.34 (m, 2H), 1.30 (t,  $J = 7.1$  Hz, 6H), 1.26-1.14 (m, 2H), 0.99-0.91 (m, 2H), 0.83 (t,  $J = 6.9$  Hz, 3H), 0.71 (t,  $J = 6.8$  Hz, 3H).  $^{13}\text{C}$  NMR (101 MHz, Chloroform-*d*)  $\delta$  165.9, 162.2, 141.0, 123.1, 81.3, 61.4, 36.2, 24.8, 18.7, 18.2, 14.3, 14.1.

**Diethyl 2,6-dimethyl-4-(pentan-3-yl)-1,4-dihydropyridine-3,5-dicarboxylate (1e)<sup>5</sup>**

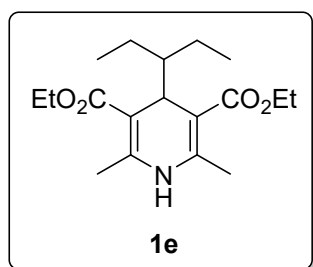

white solid.  $^1\text{H}$  NMR (400 MHz, Chloroform-*d*):  $\delta$  5.88 (br, 1H), 4.26-4.11 (m, 4H), 4.01 (d,  $J = 4.5$  Hz, 1H), 2.29 (d,  $J = 3.7$  Hz, 6H), 1.47-1.34 (m, 2H), 1.30 (t,  $J = 7.1$  Hz, 6H), 1.26-1.14 (m, 2H), 0.99-0.91 (m, 2H), 0.83 (t,  $J = 6.9$  Hz, 3H), 0.71 (t,  $J = 6.8$  Hz, 3H).  $^{13}\text{C}$

NMR (101 MHz, Chloroform-*d*)  $\delta$  165.9, 162.2, 141.0, 123.1, 81.3, 61.4, 36.2, 24.8, 18.7, 18.2, 14.3, 14.1.

**Diethyl 4-(hexan-2-yl)-2,6-dimethyl-1,4-dihydropyridine-3,5-dicarboxylate (1f)<sup>5</sup>**

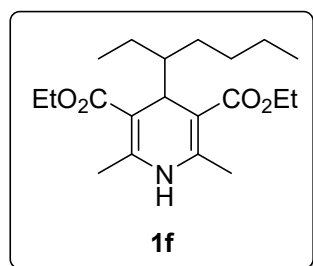

white solid.  $^1\text{H}$  NMR (400 MHz, Chloroform-*d*):  $\delta$  5.74 (br, 1H), 4.19-4.13 (m, 5H), 2.28 (d,  $J = 2.1$  Hz, 6H), 1.30 (t,  $J = 7.1$  Hz, 6H), 1.26-1.08 (m, 9H), 0.86 (t,  $J = 6.8$  Hz, 6H).  $^{13}\text{C}$  NMR (101 MHz, Chloroform-*d*)  $\delta$  168.8, 144.6, 144.5, 102.3, 102.2, 59.6, 48.1, 35.0, 29.5, 28.4, 23.2, 21.8, 19.4, 19.3, 14.3, 14.1, 11.8.

**Diethyl 2,6-dimethyl-4-(undecan-2-yl)-1,4-dihydropyridine-3,5-dicarboxylate (1g)**

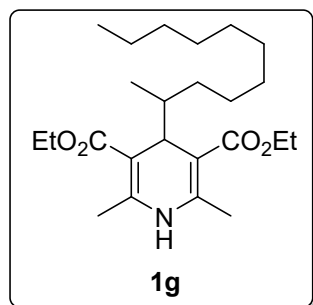

white solid.  $^1\text{H}$  NMR (400 MHz, Chloroform-*d*):  $\delta$  5.55 (s, 1H), 4.26-4.09 (m, 4H), 4.00 (d,  $J = 4.5$  Hz, 1H), 2.29 (d,  $J = 3.8$  Hz, 6H), 1.43-1.35 (m, 1H), 1.30 (t,  $J = 7.1$  Hz, 9H), 1.26-1.16 (m, 12H), 0.95-0.93 (m, 1H), 0.88 (t,  $J = 6.8$  Hz, 3H), 0.71 (d,  $J = 6.8$  Hz, 3H).  $^{13}\text{C}$  NMR (101 MHz, Chloroform-*d*)  $\delta$  165.8, 162.2, 141.1, 123.2, 81.3, 61.5, 34.1, 31.9, 29.7, 29.5, 29.3, 25.4, 24.6, 22.6, 18.3, 14.2, 14.1. HRMS

(ESI) calcd. for  $\text{C}_{24}\text{H}_{42}\text{NO}_4^+$   $[\text{M}+\text{H}]^+$  : 408.3108, found: 408.3107. IR (film,  $\nu$   $\text{cm}^{-1}$ ): 2926, 2854, 1720, 1443, 1367, 1285, 1222, 1104, 1043.

**Diethyl 4-(cyclohex-3-en-1-yl)-2,6-dimethyl-1,4-dihydropyridine-3,5-dicarboxylate (1h)<sup>5</sup>**

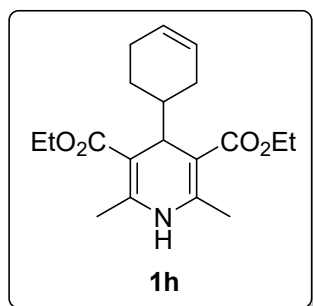

white solid. <sup>1</sup>H NMR (400 MHz, Chloroform-*d*): δ 5.62-5.55 (m, 3H), 4.27-4.10 (m, 4H), 4.02 (d, *J* = 5.8 Hz, 1H), 2.31 (d, *J* = 1.7 Hz, 6H), 2.04-1.77 (m, 4H), 1.65-1.60 (m, 4H), 1.30 (t, *J* = 7.1 Hz, 6H), 1.19 (qd, *J* = 12.3, 6.1 Hz, 1H). <sup>13</sup>C NMR (101 MHz, Chloroform-*d*) δ 165.9, 162.2, 141.1, 126.9, 123.6, 80.1, 61.5, 29.2, 25.9, 24.8, 23.3, 14.3.

**Diethyl 2,6-dimethyl-4-(6-methylhept-5-en-2-yl)-1,4-dihydropyridine-3,5-dicarboxylate (1i)<sup>5</sup>**

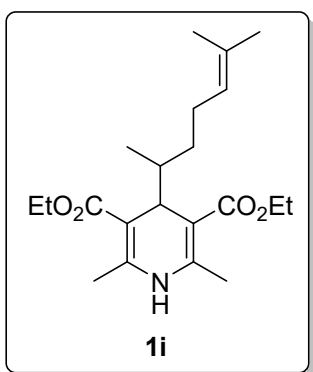

white solid. <sup>1</sup>H NMR (400 MHz, Chloroform-*d*): δ 5.66 (d, *J* = 21.5 Hz, 1H), 5.03 (tdd, *J* = 6.8, 2.8, 1.4 Hz, 1H), 4.26-4.09 (m, 4H), 4.01 (d, *J* = 4.3 Hz, 1H), 2.29 (d, *J* = 2.9 Hz, 6H), 1.99 (td, *J* = 15.2, 6.4 Hz, 1H), 1.87 (dq, *J* = 14.7, 7.3 Hz, 1H), 1.65 (s, 3H), 1.57 (s, 3H), 1.50-1.34 (m, 2H), 1.29 (td, *J* = 7.1, 1.5 Hz, 6H), 1.03-0.94 (m, 1H), 0.73 (d, *J* = 6.8 Hz, 3H). <sup>13</sup>C NMR (101 MHz, Chloroform-*d*) δ 168.9, 168.5, 144.7, 144.5, 130.8, 125.2, 102.1, 101.3, 59.6, 59.5, 40.9, 38.0,

32.7, 26.1, 25.7, 19.3, 19.3, 17.7, 14.9, 14.3, 14.3.

**Diethyl 2,6-dimethyl-4-(4-(4-methylpent-3-en-1-yl)cyclohex-3-en-1-yl)-1,4-dihydropyridine-3,5-dicarboxylate (1j)<sup>7</sup>**

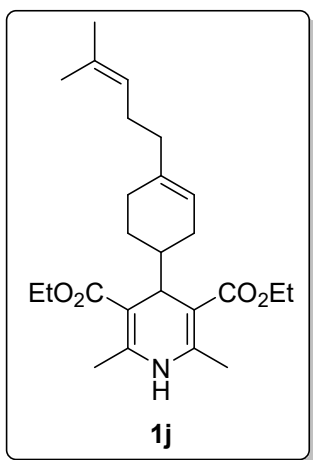

white solid. <sup>1</sup>H NMR (400 MHz, Chloroform-*d*): δ 5.66 (d, *J* = 21.5 Hz, 1H), 5.03 (tdd, *J* = 6.8, 2.8, 1.4 Hz, 1H), 4.26-4.09 (m, 4H), 4.01 (d, *J* = 4.3 Hz, 1H), 2.29 (d, *J* = 2.9 Hz, 6H), 1.99 (td, *J* = 15.2, 6.4 Hz, 1H), 1.87 (dq, *J* = 14.7, 7.3 Hz, 1H), 1.65 (s, 3H), 1.57 (s, 3H), 1.50-1.34 (m, 2H), 1.29 (td, *J* = 7.1, 1.5 Hz, 6H), 1.03-0.94 (m, 1H), 0.73 (d, *J* = 6.8 Hz, 3H). <sup>13</sup>C NMR (101 MHz, Chloroform-*d*) δ 168.6, 168.5, 144.8, 144.6, 137.4, 131.3, 124.5, 120.6, 101.8, 59.6, 41.7, 37.6, 37.6, 29.2, 27.5, 26.5, 25.7, 25.4, 19.5, 19.5, 17.7, 17.6, 14.4.

**Diethyl 4-(bicyclo[2.2.1]heptan-2-yl)-2,6-dimethyl-1,4-dihydropyridine-3,5-dicarboxylate**

**(1k)<sup>5</sup>**

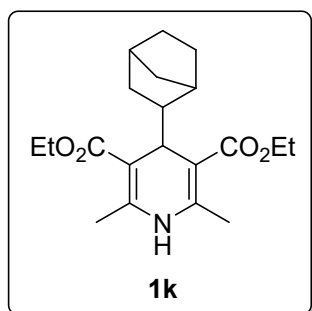

white solid. <sup>1</sup>H NMR (400 MHz, Chloroform-*d*): δ 5.64 (d, *J* = 101.1 Hz, 1H), 4.32-4.07 (m, 4H), 3.90 (dd, *J* = 65.8, 10.1 Hz, 1H), 2.30 (dd, *J* = 15.3, 12.8 Hz, 6H), 2.18-2.04 (m, 1H), 1.99-1.85 (m, 1H), 1.73-1.49 (m, 1H), 1.47-1.32 (m, 4H), 1.32-1.25 (m, 6H), 1.17 (q, *J* = 9.3 Hz, 1H), 1.03 (ddd, *J* = 30.3, 12.5, 8.4 Hz, 2H), 0.96-0.74 (m, 1H). <sup>13</sup>C NMR NMR for the major diastereoisomer (101 MHz, Chloroform-*d*) δ 168.8, 168.6, 145.0, 148.8, 103.8, 102.6, 59.7, 59.6, 48.5, 38.2, 36.6, 35.6, 34.0, 30.3, 29.2, 22.6, 19.4, 19.4, 14.3. <sup>13</sup>C NMR NMR for the minor diastereoisomer (101 MHz, Chloroform-*d*) δ 168.6, 168.5, 144.7, 144.0, 102.5, 102.5, 59.6, 59.6, 47.4, 39.4, 37.9, 36.6, 33.2, 31.6, 30.9, 22.2, 19.5, 19.2, 14.4.

**Diethyl 4-(1-(4-isopropylphenyl)propan-2-yl)-2,6-dimethyl-1,4-dihydropyridine-3,5-dicarboxylate (1l)<sup>5</sup>**

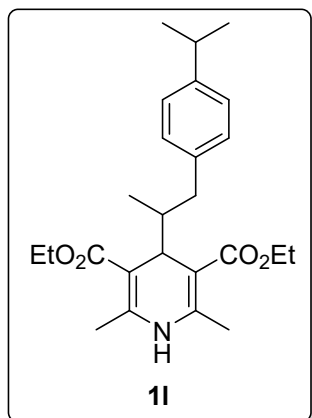

white solid. <sup>1</sup>H NMR (400 MHz, Chloroform-*d*): δ 7.09 (d, *J* = 8.1 Hz, 2H), 7.00 (d, *J* = 8.1 Hz, 2H), 5.63 (br, 1H), 4.27-4.12 (m, 5H), 2.88-2.81 (m, 1H), 2.76 (dd, *J* = 13.3, 3.6 Hz, 1H), 2.31 (d, *J* = 1.7 Hz, 6H), 2.08 (dd, *J* = 13.3, 11.2 Hz, 1H), 1.78-1.68 (m, 1H), 1.30 (dt, *J* = 12.4, 7.1 Hz, 6H), 1.22 (d, *J* = 6.9 Hz, 6H), 0.64 (d, *J* = 6.8 Hz, 3H). <sup>13</sup>C NMR (101 MHz, Chloroform-*d*) δ 168.8, 168.5, 145.9, 144.9, 139.4, 128.9, 126.0, 101.8, 59.7, 43.1, 38.8, 38.7, 33.7, 26.9, 24.1, 19.4, 14.5, 14.5, 14.4.

**Diethyl 4-(1-(4-(tert-butyl)phenyl)propan-2-yl)-2,6-dimethyl-1,4-dihydropyridine-3,5-dicarboxylate (1m)<sup>4</sup>**

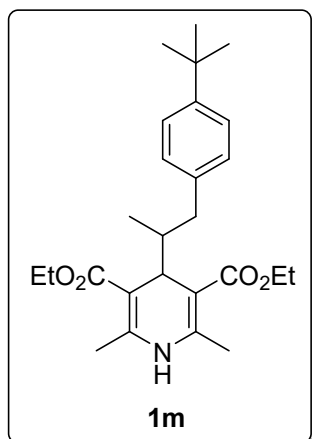

white solid. <sup>1</sup>H NMR (400 MHz, Chloroform-*d*): δ 7.26-7.24 (m, 2H), 7.01 (d, *J* = 8.3 Hz, 2H), 5.64 (br, 1H), 4.28-4.13 (m, 5H), 2.76 (dd, *J* = 13.3, 3.6 Hz, 1H), 2.31 (d, *J* = 1.6 Hz, 6H), 2.09 (dd, *J* = 13.3,



11.1 Hz, 1H), 1.78-1.69 (m, 1H), 1.32 (d,  $J = 7.1$  Hz, 3H), 1.28 (d,  $J = 1.7$  Hz, 12H), 0.64 (d,  $J = 6.8$  Hz, 3H).  $^{13}\text{C}$  NMR (101 MHz, Chloroform-*d*)  $\delta$  168.7, 168.4, 148.1, 144.8, 144.7, 139.0, 128.7, 124.9, 102.0, 101.5, 59.7, 43.1, 38.7, 34.3, 31.4, 19.5, 19.4, 14.5, 14.5, 14.4.

**Diethyl 4-(1-(benzo[*d*][1,3]dioxol-5-yl)propan-2-yl)-2,6-dimethyl-1,4-dihydropyridine-3,5-dicarboxylate (1n)<sup>4</sup>**

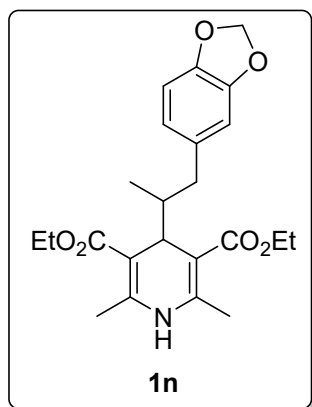

white solid.  $^1\text{H}$  NMR (400 MHz, Chloroform-*d*):  $\delta$  6.68 (d,  $J = 7.9$  Hz, 1H), 6.57 (d,  $J = 1.7$  Hz, 1H), 6.52 (dd,  $J = 7.8, 1.7$  Hz, 1H), 5.89 (q,  $J = 1.5$  Hz, 2H), 5.72 (br, 1H), 4.28-4.12 (m, 4H), 4.10 (d,  $J = 4.8$  Hz, 1H), 2.72 (dd,  $J = 13.4, 3.5$  Hz, 1H), 2.32 (d,  $J = 1.2$  Hz, 6H), 2.02 (dd,  $J = 13.3, 11.3$  Hz, 1H), 1.72-1.64 (m, 1H), 1.31 (dt,  $J = 9.1, 7.1$  Hz, 6H), 0.63 (d,  $J = 6.8$  Hz, 3H).  $^{13}\text{C}$  NMR (101 MHz, Chloroform-*d*)  $\delta$  168.7, 168.5, 147.3, 145.3, 145.0, 136.0, 121.7, 109.3, 107.8, 101.8, 101.3, 100.6, 59.7, 43.3, 39.0, 38.6, 19.4, 19.4, 14.5, 14.4.

**Diethyl 4-(1-(*tert*-butoxycarbonyl)piperidin-4-yl)-2,6-dimethyl-1,4-dihydropyridine-3,5-dicarboxylate (1o)<sup>4</sup>**

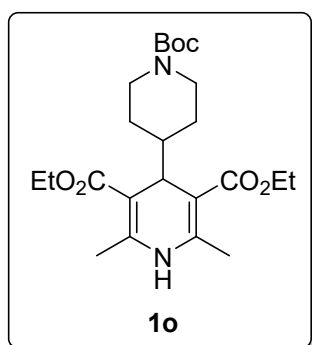

white solid.  $^1\text{H}$  NMR (400 MHz, Chloroform-*d*):  $\delta$  5.84 (br, 1H), 4.25-4.05 (m, 6H), 4.00 (d,  $J = 5.6$  Hz, 1H), 2.50 (t,  $J = 11.7$  Hz, 2H), 2.31 (s, 6H), 1.49-1.37 (m, 12H), 1.30 (t,  $J = 7.1$  Hz, 6H), 1.13 (qd,  $J = 12.5, 4.3$  Hz, 2H).  $^{13}\text{C}$  NMR (101 MHz, Chloroform-*d*)  $\delta$  168.4, 154.9, 145.5, 100.9, 79.2, 59.7, 44.0, 37.5, 28.5, 26.9, 22.6, 19.4, 14.4.

**Diethyl 4-(4-(4-hydroxy-4-methylpentyl)cyclohex-3-en-1-yl)-2,6-dimethyl-1,4-dihydropyridine-3,5-dicarboxylate (1p)**

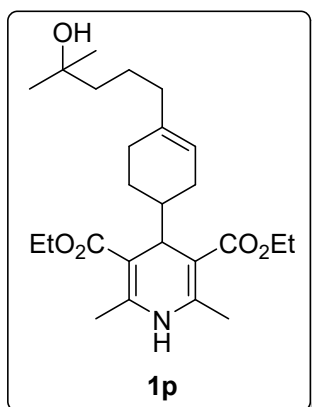

yellow oil.  $^1\text{H}$  NMR (400 MHz, Chloroform-*d*):  $\delta$  5.80 (d,  $J = 7.2$  Hz, 1H), 5.31 (d,  $J = 13.8$  Hz, 1H), 4.26-4.11 (m, 4H), 4.02 (t,  $J = 5.6$  Hz, 1H), 2.31 (d,  $J = 2.2$  Hz, 6H), 1.89-1.84 (m, 4H), 1.78-1.63 (m, 3H),

1.4-1.43 (m, 6H), 1.30 (td,  $J = 7.1, 1.7$  Hz, 6H), 1.20 (s, 6H), 0.88-0.83 (m, 1H).  $^{13}\text{C}$  NMR (101 MHz, Chloroform-*d*)  $\delta$  168.7, 168.6, 137.6, 137.2, 120.9, 120.3, 101.5, 71.0, 59.6, 43.6, 43.5, 42.0, 41.6, 38.2, 37.8, 37.7, 37.5, 29.1, 28.9, 27.5, 25.3, 22.5, 19.4, 19.3, 14.4, 14.4. HRMS (ESI) calcd. for  $\text{C}_{25}\text{H}_{40}\text{NO}_5^+$   $[\text{M}+\text{H}]^+$ : 434.2901, found: 434.2903. IR (film,  $\nu$   $\text{cm}^{-1}$ ): 3337, 2936, 1673, 1486, 1369, 1210, 1096, 1046.

#### Diethyl 4-(4,4-difluorocyclohexyl)-2,6-dimethyl-1,4-dihydropyridine-3,5-dicarboxylate (**1q**)

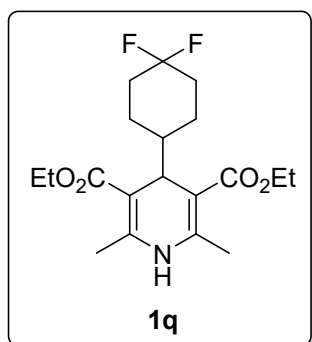

white solid.  $^1\text{H}$  NMR (400 MHz, Chloroform-*d*):  $\delta$  5.83 (br, 1H), 4.26-4.12 (m, 4H), 4.01 (d,  $J = 2.6$  Hz, 1H), 2.32 (s, 6H), 2.08-1.98 (m, 2H), 1.65-1.47 (m, 4H), 1.30 (t,  $J = 7.1$  Hz, 9H).  $^{13}\text{C}$  NMR (101 MHz, Chloroform-*d*)  $\delta$  168.3, 145.1, 126.3, 101.4, 59.8, 43.4, 37.0, 33.8 ( $J = 20.2$  Hz), 24.8 ( $J = 9.7$  Hz), 19.6, 14.4. HRMS (ESI) calcd. for  $\text{C}_{18}\text{H}_{28}\text{F}_2\text{NO}_4^+$   $[\text{M}+\text{H}]^+$ : 372.1981, found: 372.1977. IR (film,  $\nu$   $\text{cm}^{-1}$ ): 2948, 2159, 2029, 1694, 1651, 1484, 1371, 1294, 1208, 1094, 1047.

#### Diethyl 4-(4-chlorobutan-2-yl)-2,6-dimethyl-1,4-dihydropyridine-3,5-dicarboxylate (**1r**)

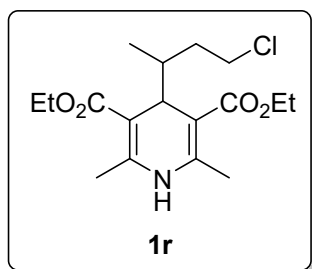

white solid.  $^1\text{H}$  NMR (400 MHz, Chloroform-*d*):  $\delta$  5.56 (br, 1H), 4.27-4.11 (m, 4H), 4.03 (d,  $J = 4.2$  Hz, 1H), 3.63-3.51 (m, 2H), 2.31 (s, 6H), 1.68-1.42 (m, 3H), 1.31 (t,  $J = 7.1$  Hz, 9H), 0.75 (t,  $J = 6.9$  Hz, 3H).  $^{13}\text{C}$  NMR (101 MHz, Chloroform-*d*)  $\delta$  168.6, 168.2, 145.5, 145.3, 101.6, 100.3, 59.8, 59.8, 43.8, 38.6, 37.0, 35.8, 19.5, 19.3, 14.8, 14.4, 14.3. HRMS (ESI) calcd. for  $\text{C}_{17}\text{H}_{27}\text{ClNO}_4^+$   $[\text{M}+\text{H}]^+$ : 344.1623, found: 344.1620. IR (film,  $\nu$   $\text{cm}^{-1}$ ): 2977, 1692, 1486, 1368, 1209, 1097, 1047, 773.

#### Diethyl 2,6-dimethyl-4-phenethyl-1,4-dihydropyridine-3,5-dicarboxylate (**1s**)<sup>7</sup>

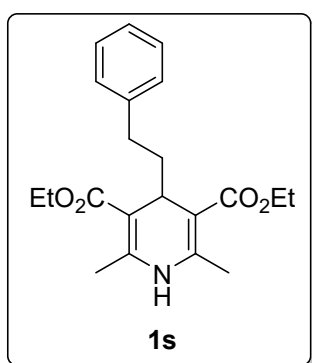

white solid.  $^1\text{H}$  NMR (400 MHz, Chloroform-*d*):  $\delta$  7.23 (dd,  $J = 8.0, 6.9$  Hz, 2H), 7.13 (d,  $J = 7.4, 6.9$  Hz, 3H), 5.62 (br, 1H), 4.26-4.12 (m, 4H), 4.06 (t,  $J = 5.7$  Hz, 1H), 2.56-2.52 (m, 2H), 2.30 (s, 6H),

1.69-1.63 (m, 3H), 1.29 (t,  $J = 7.1$  Hz, 6H).  $^{13}\text{C}$  NMR (101 MHz, Chloroform-*d*)  $\delta$  168.0, 144.9, 143.1, 128.2, 128.1, 125.4, 103.0, 59.7, 38.4, 33.2, 31.4, 19.6, 14.4.

**Diethyl 2,6-dimethyl-4-phenethyl-1,4-dihydropyridine-3,5-dicarboxylate (1t)**<sup>7</sup>

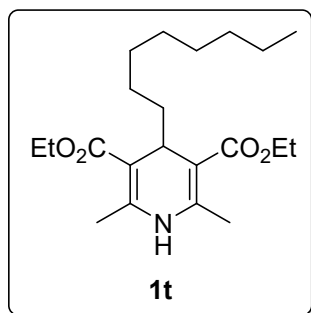

white solid.  $^1\text{H}$  NMR (400 MHz, Chloroform-*d*):  $\delta$  5.66 (br, 1H), 4.26-4.11 (m, 4H), 3.92 (t,  $J = 5.8$  Hz, 1H), 2.28 (s, 6H), 1.29 (t,  $J = 7.1$  Hz, 9H), 1.23-1.15 (m, 10H), 0.87 (t,  $J = 6.9$  Hz, 3H).  $^{13}\text{C}$  NMR (101 MHz, Chloroform-*d*)  $\delta$  168.2, 144.7, 103.3, 59.6, 36.9, 32.9, 31.9, 29.9, 29.7, 29.4, 24.9, 22.7, 19.4, 14.4, 14.1.

**Diethyl 2,6-dimethyl-4-((2,6,6-trimethylcyclohex-1-en-1-yl)methyl)-1,4-dihydropyridine-3,5-dicarboxylate (1u)**

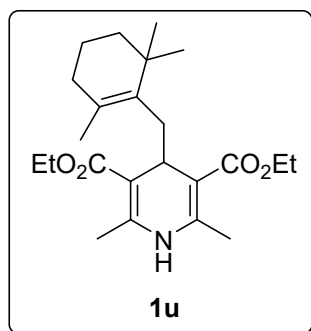

white solid.  $^1\text{H}$  NMR (400 MHz, Chloroform-*d*):  $\delta$  5.68 (br, 1H), 4.23-4.09 (m, 5H), 2.27 (s, 6H), 2.11-1.82 (m, 4H), 1.59 (s, 3H), 1.55-1.37 (m, 4H), 1.31 (t,  $J = 7.1$  Hz, 6H), 1.02-0.83 (m, 6H).  $^{13}\text{C}$  NMR (101 MHz, Chloroform-*d*)  $\delta$  168.2, 144.5, 133.0, 129.7, 103.9, 59.7, 40.1, 35.2, 33.6, 33.5, 33.1, 30.3, 20.6, 19.5, 19.4, 14.5. HRMS (ESI) calcd. for  $\text{C}_{23}\text{H}_{36}\text{ClNO}_4^+$   $[\text{M}+\text{H}]^+$  : 390.2639, found: 390.2638. IR (film,  $\nu$   $\text{cm}^{-1}$ ): 2929, 1720, 1600, 1444, 1285, 1223, 1105, 1004.

**Dimethyl 4-cyclohexyl-2,6-dimethyl-1,4-dihydropyridine-3,5-dicarboxylate (1v)**<sup>6</sup>

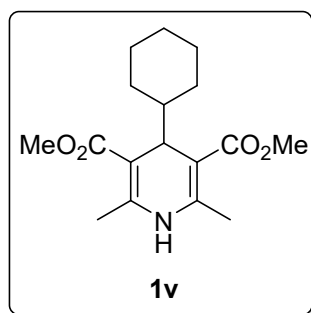

white solid.  $^1\text{H}$  NMR (400 MHz, Chloroform-*d*):  $\delta$  5.68 (br, 1H), 4.23-4.09 (m, 5H), 2.27 (s, 6H), 2.11-1.82 (m, 4H), 1.59 (s, 3H), 1.55-1.37 (m, 4H), 1.31 (t,  $J = 7.1$  Hz, 6H), 1.02-0.83 (m, 6H).  $^{13}\text{C}$  NMR (101 MHz, Chloroform-*d*)  $\delta$  169.1, 144.8, 101.6, 50.9, 45.6, 38.4, 28.6, 26.7, 26.6, 19.4.

**Di-*tert*-butyl 4-cyclohexyl-2,6-dimethyl-1,4-dihydropyridine-3,5-dicarboxylate (1w)**<sup>6</sup>

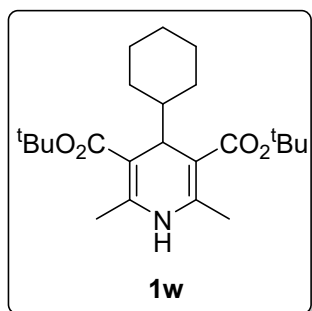

white solid. <sup>1</sup>H NMR (400 MHz, Chloroform-*d*): δ 5.53-5.42 (m, 1H), 3.84 (dd, *J* = 6.1, 1.7 Hz, 1H), 2.26 (s, 6H), 1.66-1.65 (m, 2H), 1.59-1.56 (m, 3H), 1.49 (s, 18H), 1.16-1.08 (s, 4H), 0.98-0.88 (m, 2H). <sup>13</sup>C NMR (101 MHz, Chloroform-*d*) δ 168.1, 143.3, 103.3, 79.3, 45.8, 39.0, 29.2, 28.3, 26.8, 26.7, 19.3.

**2-Cyclohexyl-4,4,5,5-tetramethyl-1,3,2-dioxaborolane (2a)**<sup>8</sup>

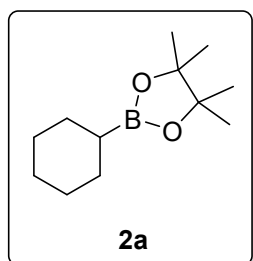

53 mg, 84% isolated yield, colorless oil. <sup>1</sup>H NMR (400 MHz, Chloroform-*d*): δ 1.67-1.58 (m, 5H), 1.38 1.27 (m, 5H), 1.23 (s, 12H), 1.00-0.97 (m, 1H). <sup>13</sup>C NMR (101 MHz, Chloroform-*d*) δ 82.7, 27.9, 27.1, 26.7, 24.7.

**2-Cyclopentyl-4,4,5,5-tetramethyl-1,3,2-dioxaborolane (2b)**<sup>8</sup>

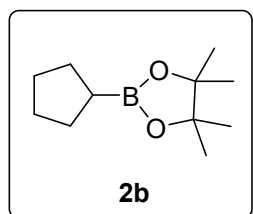

35 mg, 60% isolated yield, colorless oil. <sup>1</sup>H NMR (400 MHz, Chloroform-*d*): δ 1.74 (dd, *J* = 12.0, 7.5 Hz, 2H), 1.61-1.57 (m, 2H), 1.54-1.39 (m, 4H), 1.24 (s, 12H), 1.19-1.15 (m, 1H). <sup>13</sup>C NMR (101 MHz, Chloroform-*d*) δ 82.8, 28.5, 26.8, 24.7.

**2-(*sec*-Butyl)-4,4,5,5-tetramethyl-1,3,2-dioxaborolane (2c)**<sup>8</sup>

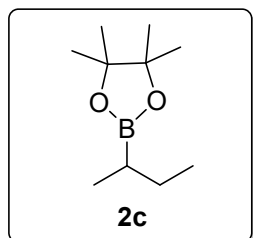

86% GC-FID yield, colorless oil. <sup>1</sup>H NMR (400 MHz, Chloroform-*d*): δ 1.24 (s, 12H), 0.96 (s, 3H), 0.92-0.90 (m, 2H), 0.89-0.83 (m, 1H). <sup>13</sup>C NMR (101 MHz, Chloroform-*d*) δ 82.7, 26.1, 24.7, 24.7, 15.2, 13.4.

**4,4,5,5-Tetramethyl-2-(pentan-2-yl)-1,3,2-dioxaborolane (2d)**<sup>9</sup>

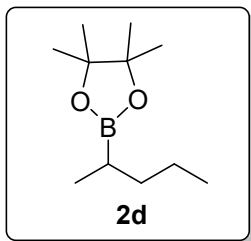

38 mg, 64% isolated yield, yellow oil.  $^1\text{H}$  NMR (400 MHz, Chloroform-*d*):  $\delta$  1.45-1.39 (m, 1H), 1.35-1.29 (m, 4H), 1.24 (s, 12H), 0.96 (d,  $J = 6.5$  Hz, 3H), 0.87 (d,  $J = 7.1$  Hz, 3H).  $^{13}\text{C}$  NMR (101 MHz, Chloroform-*d*)  $\delta$  82.8, 35.5, 24.7 (d,  $J = 3.0$  Hz), 22.2, 15.5, 14.3.

**4,4,5,5-Tetramethyl-2-(pentan-3-yl)-1,3,2-dioxaborolane (2e)<sup>9</sup>**

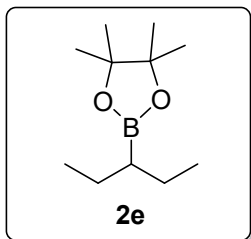

40 mg, 68% isolated yield, yellow oil.  $^1\text{H}$  NMR (400 MHz, Chloroform-*d*):  $\delta$  1.42 (dq,  $J = 13.5, 6.9, 6.3$  Hz, 4H), 1.25 (s, 12H), 0.90 (t,  $J = 7.4$  Hz, 6H).  $^{13}\text{C}$  NMR (101 MHz, Chloroform-*d*)  $\delta$  82.8, 24.8, 24.0, 13.7.

**2-(Heptan-3-yl)-4,4,5,5-tetramethyl-1,3,2-dioxaborolane (2f)<sup>10</sup>**

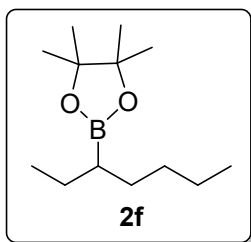

57 mg, 90% isolated yield, colorless oil.  $^1\text{H}$  NMR (400 MHz, Chloroform-*d*):  $\delta$  1.46-1.27 (m, 8H), 1.25 (s, 12H), 0.91-0.86 (m, 6H).  $^{13}\text{C}$  NMR (101 MHz, Chloroform-*d*)  $\delta$  82.8, 31.5, 30.8, 24.8 (d,  $J = 1.6$  Hz), 24.3, 23.0, 14.1, 13.0.

**4,4,5,5-Tetramethyl-2-(undecan-2-yl)-1,3,2-dioxaborolane (2g)<sup>11</sup>**

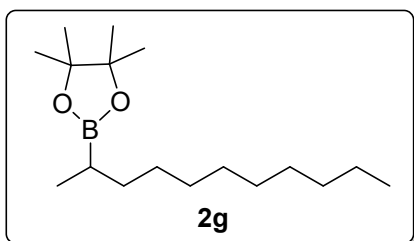

76 mg, 90% isolated yield, colorless oil.  $^1\text{H}$  NMR (400 MHz, Chloroform-*d*):  $\delta$  1.46-1.39 (m, 1H), 1.26 (s, 15H), 1.24 (s, 12H), 0.95 (d,  $J = 5.2$  Hz, 3H), 0.88 (t,  $J = 6.7$  Hz, 3H).  $^{13}\text{C}$  NMR (101 MHz, Chloroform-*d*)  $\delta$  82.7, 33.3, 31.9, 29.9, 29.6 (d,  $J = 4.0$  Hz), 29.3, 29.0, 26.9, 24.7 (d,  $J = 3.3$

Hz), 22.7, 15.5, 14.1.

**2-(Cyclohex-3-en-1-yl)-4,4,5,5-tetramethyl-1,3,2-dioxaborolane (2h)<sup>12</sup>**

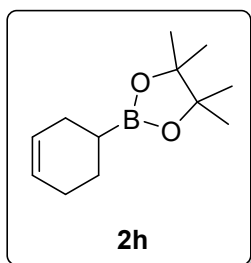

22 mg, 35% isolated yield, colorless oil.  $^1\text{H}$  NMR (400 MHz, Chloroform-

*d*):  $\delta$  5.73-5.65 (m, 2H), 2.06-1.98 (m, 4H), 1.79 (dq,  $J = 12.7, 4.5$  Hz, 1H), 1.59-1.49 (m, 2H), 1.24 (s, 12H).  $^{13}\text{C}$  NMR (101 MHz, Chloroform-*d*)  $\delta$  127.6, 127.0, 82.9, 26.3, 25.3, 24.8 (d,  $J = 4.4$  Hz), 23.9.

**4,4,5,5-Tetramethyl-2-(6-methylhept-5-en-2-yl)-1,3,2-dioxaborolane (2i)<sup>13</sup>**

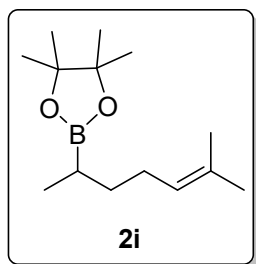

44 mg, 62% isolated yield, colorless oil.  $^1\text{H}$  NMR (400 MHz, Chloroform-*d*):  $\delta$  5.12 (ddd,  $J = 7.2, 5.7, 1.5$  Hz, 1H), 1.98 (q,  $J = 7.7$  Hz, 2H), 1.67 (s, 3H), 1.60 (s, 3H), 1.53-1.44 (m, 1H), 1.31 (dd,  $J = 13.5, 7.4$  Hz, 1H), 1.24 (s, 12H), 1.08-1.00 (m, 1H), 0.97 (d,  $J = 6.2$  Hz, 3H).  $^{13}\text{C}$  NMR (101 MHz, Chloroform-*d*)  $\delta$  131.1, 125.0, 82.8, 33.4, 27.4, 25.7, 24.7 (d,  $J = 6.1$  Hz),

17.6, 15.5.

**4,4,5,5-Tetramethyl-2-(4-(4-methylpent-3-en-1-yl)cyclohex-3-en-1-yl)-1,3,2-dioxaborolane**

(2j)<sup>14</sup>

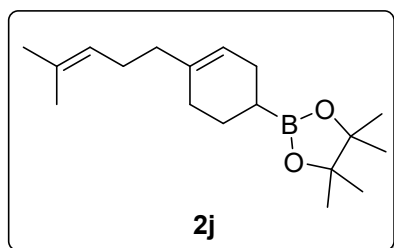

44 mg, 62% isolated yield, colorless oil.  $^1\text{H}$  NMR (400 MHz, Chloroform-*d*):  $\delta$  5.12 (ddd,  $J = 7.2, 5.7, 1.5$  Hz, 1H), 1.98 (q,  $J = 7.7$  Hz, 2H), 1.67 (s, 3H), 1.60 (s, 3H), 1.53-1.44 (m, 1H), 1.31 (dd,  $J = 13.5, 7.4$  Hz, 1H), 1.24 (s, 12H), 1.08-1.00 (m, 1H), 0.97 (d,  $J = 6.2$  Hz, 3H).  $^{13}\text{C}$  NMR (101 MHz,

Chloroform-*d*)  $\delta$  131.1, 125.0, 82.8, 33.4, 27.4, 25.7, 24.7 (d,  $J = 6.1$  Hz), 17.6, 15.5.

**2-((1R,2R,4R)-Bicyclo[2.2.1]heptan-2-yl)-4,4,5,5-tetramethyl-1,3,2-dioxaborolane (2k)<sup>8</sup>**

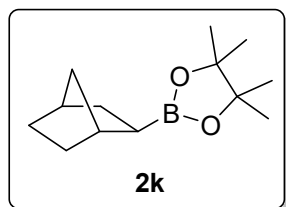

44 mg, 66% isolated yield, colorless oil.  $^1\text{H}$  NMR (400 MHz, Chloroform-*d*):  $\delta$  2.29-2.28 (m, 1H), 2.22 (s, 1H), 1.57-1.43 (m, 3H), 1.38-1.31 (m, 1H), 1.26-1.25 (m, 1H), 1.23 (s, 12H), 1.15 (dt,  $J = 9.4, 1.9$  Hz, 1H), 0.88 (dd,  $J = 9.4, 6.8$  Hz, 1H).  $^{13}\text{C}$  NMR (101 MHz,

Chloroform-*d*)  $\delta$  82.8, 38.7, 38.1, 36.6, 32.2, 32.2, 29.3, 24.7.

**2-(1-(4-Isopropylphenyl)propan-2-yl)-4,4,5,5-tetramethyl-1,3,2-dioxaborolane (2l)**

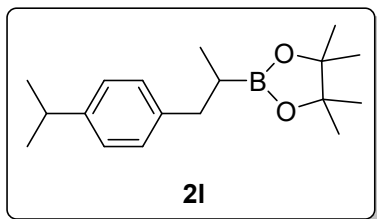

74 mg, 86% isolated yield, colorless oil. <sup>1</sup>H NMR (400 MHz, Chloroform-*d*): δ 7.11 (d, *J* = 1.5 Hz, 4H), 2.85 (p, *J* = 6.9 Hz, 1H), 2.76 (dd, *J* = 13.6, 7.5 Hz, 1H), 2.51 (dd, *J* = 13.6, 8.4 Hz, 1H), 1.36 (q, *J* = 7.6 Hz, 1H), 1.22 (d, *J* = 7.0 Hz, 6H), 1.17 (d, *J* = 8.0 Hz, 12H), 0.96 (dd, *J* = 7.4, 1.0 Hz, 3H). <sup>13</sup>C NMR (101 MHz, Chloroform-*d*) δ 146.0, 139.6, 128.8, 126.0, 82.9, 38.6, 33.7, 24.7 (d, *J* = 3.7 Hz), 24.1 (d, *J* = 1.4 Hz), 15.3. HRMS (ESI) calcd. for C<sub>18</sub>H<sub>30</sub>BO<sub>2</sub><sup>+</sup> [M+H]<sup>+</sup> : 289.2339, found: 289.2330. IR (film, ν cm<sup>-1</sup>): 2958, 1459, 1370, 1316, 1231, 1142, 857, 804.

**2-(1-(4-(*tert*-Butyl)phenyl)propan-2-yl)-4,4,5,5-tetramethyl-1,3,2-dioxaborolane (2m)<sup>15</sup>**

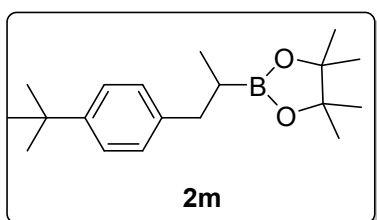

80 mg, 88% isolated yield, colorless oil. <sup>1</sup>H NMR (400 MHz, Chloroform-*d*): δ 7.26 (d, *J* = 8.3 Hz, 2H), 7.12 (d, *J* = 8.3 Hz, 2H), 2.76 (dd, *J* = 13.6, 7.5 Hz, 1H), 2.52 (dd, *J* = 13.6, 8.4 Hz, 1H), 1.36 (q, *J* = 7.6 Hz, 1H), 1.29 (s, 9H), 1.17 (d, *J* = 9.0 Hz, 12H), 0.97 (d, *J* = 7.4 Hz, 3H). <sup>13</sup>C NMR (101 MHz, Chloroform-*d*) δ 148.3, 139.2, 128.6, 124.9, 82.9, 38.5, 34.3, 31.5, 24.7 (d, *J* = 5.0 Hz), 15.3.

**2-(1-(Benzo[*d*][1,3]dioxol-5-yl)propan-2-yl)-4,4,5,5-tetramethyl-1,3,2-dioxaborolane (2n)<sup>16</sup>**

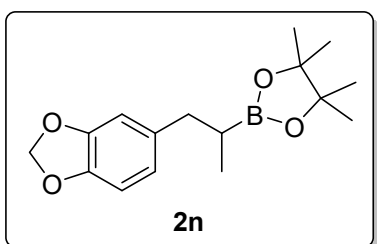

78 mg, 90% isolated yield, yellow oil. <sup>1</sup>H NMR (400 MHz, Chloroform-*d*): δ 6.69 (d, *J* = 7.8 Hz, 2H), 6.64 (dd, *J* = 7.9, 1.7 Hz, 1H), 5.89 (s, 2H), 2.72 (dd, *J* = 13.6, 7.6 Hz, 1H), 2.46 (dd, *J* = 13.6, 8.2 Hz, 1H), 1.30 (q, *J* = 7.6 Hz, 1H), 1.20 (d, *J* = 3.4 Hz, 12H), 0.95 (d, *J* = 7.4 Hz, 3H). <sup>13</sup>C NMR (101 MHz, Chloroform-*d*) δ 147.3, 145.4, 136.2, 121.6, 109.4, 107.8, 100.6, 83.0, 38.7, 24.7 (d, *J* = 3.4 Hz), 15.1.

***tert*-Butyl 4-(4,4,5,5-tetramethyl-1,3,2-dioxaborolan-2-yl)piperidine-1-carboxylate (2o)<sup>10</sup>**

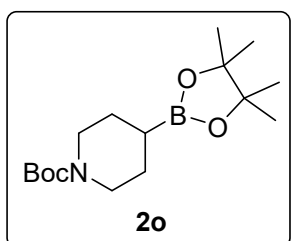

65 mg, 70% isolated yield, colorless oil. <sup>1</sup>H NMR (400 MHz, Chloroform-*d*): δ 3.78 (d, *J* = 13.3 Hz, 2H), 2.96-2.89 (m, 2H), 1.63-

1.61 (m, 2H), 1.46 (s, 1H), 1.44 (s, 9H), 1.27-1.25 (m, 2H), 1.23 (s, 12H).  $^{13}\text{C}$  NMR (101 MHz, Chloroform-*d*)  $\delta$  154.9, 83.1, 79.0, 29.7, 28.5, 27.0, 24.8.

### 2-Methyl-5-(4-(4,4,5,5-tetramethyl-1,3,2-dioxaborolan-2-yl)cyclohex-1-en-1-yl)pentan-2-ol

(2p)

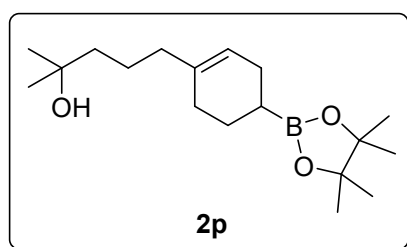

19 mg, 21% isolated yield, yellow oil.  $^1\text{H}$  NMR (400 MHz, Chloroform-*d*):  $\delta$  2.29-2.28 (m, 1H), 2.22 (s, 1H), 1.57-1.43 (m, 3H), 1.38-1.31 (m, 1H), 1.26-1.25 (m, 1H), 1.23 (s, 12H), 1.15 (dt,  $J = 9.4, 1.9$  Hz, 1H), 0.88 (dd,  $J = 9.4, 6.8$  Hz, 1H).  $^{13}\text{C}$  NMR (101 MHz, Chloroform-*d*)  $\delta$  138.13,

137.46 (d,  $J = 4.8$  Hz), 124.59 (d,  $J = 9.3$  Hz), 120.96 (dd,  $J = 52.4, 14.0$  Hz), 109.61 (d,  $J = 2.9$  Hz), 82.86, 38.13, 37.71 (d,  $J = 5.7$  Hz), 37.51 (d,  $J = 9.8$  Hz), 28.94 (dd,  $J = 105.7, 10.8$  Hz), 26.17 (dd,  $J = 81.1, 11.8$  Hz), 24.75 (d,  $J = 2.7$  Hz), 22.47 (d,  $J = 4.0$  Hz), 17.70 (d,  $J = 3.3$  Hz). HRMS (ESI) calcd. for  $\text{C}_{18}\text{H}_{34}\text{BO}_3^+$   $[\text{M}+\text{H}]^+$  : 309.2596, found: 309.2595. IR (film,  $\nu$   $\text{cm}^{-1}$ ): 2922, 2852, 1729, 1457, 1377, 1072, 720.

### 2-(4,4-Difluorocyclohexyl)-4,4,5,5-tetramethyl-1,3,2-dioxaborolane (2q)<sup>10</sup>

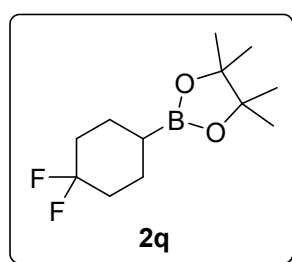

52 mg, 71% isolated yield, colorless oil.  $^1\text{H}$  NMR (400 MHz, Chloroform-*d*):  $\delta$  2.05-1.93 (m, 2H), 1.84-1.58 (m, 6H), 1.24 (s, 12H), 1.04-0.93 (m, 1H).  $^{13}\text{C}$  NMR (101 MHz, Chloroform-*d*)  $\delta$  123.7 (t,  $J = 240.6$  Hz), 83.2, 34.4 (t,  $J = 23.4$  Hz), 24.7, 24.3.

### 2-(4-Chlorobutan-2-yl)-4,4,5,5-tetramethyl-1,3,2-dioxaborolane (2r)

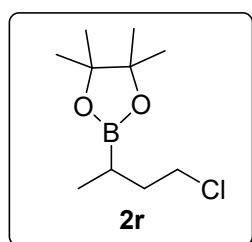

51 mg, 76% isolated yield, colorless oil.  $^1\text{H}$  NMR (400 MHz, Chloroform-*d*):  $\delta$  3.51 (t,  $J = 7.1$  Hz, 2H), 1.93-1.81 (m, 1H), 1.67 (dq,  $J = 14.0, 7.0$  Hz, 1H), 1.17 (s, 12H), 0.93 (d,  $J = 7.5$  Hz, 3H).  $^{13}\text{C}$  NMR (101 MHz, Chloroform-*d*)  $\delta$  83.1, 44.5, 35.9, 24.8 (d,  $J = 8.2$  Hz), 15.0. HRMS (ESI) calcd. for  $\text{C}_{10}\text{H}_{21}\text{BclO}_2^+$   $[\text{M}+\text{H}]^+$  : 219.1319, found: 219.1317. IR (film,  $\nu$



cm<sup>-1</sup>): 2922, 2853, 1727, 1464, 1259, 1093, 1023, 798.

**4,4,5,5-Tetramethyl-2-phenethyl-1,3,2-dioxaborolane (2s)<sup>8</sup>**

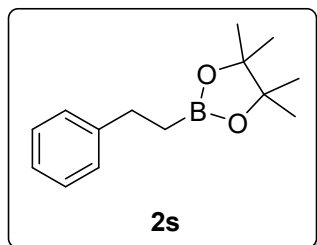

19 mg, 27% isolated yield, yellow oil. <sup>1</sup>H NMR (400 MHz, Chloroform-*d*): δ 7.23 (dd, *J* = 14.6, 7.2 Hz, 4H), 7.17-7.13 (m, 1H), 2.77-2.73 (m, 2H), 1.22 (s, 12H), 1.16-1.12 (m, 2H). <sup>13</sup>C NMR (101 MHz, Chloroform-*d*) δ 144.4, 128.2, 128.0, 125.5, 83.1, 30.0, 24.8.

**4,4,5,5-Tetramethyl-2-octyl-1,3,2-dioxaborolane (2t)<sup>8</sup>**

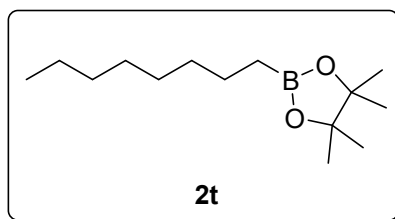

31% GC-FID yield, colorless oil. <sup>1</sup>H NMR (400 MHz, Chloroform-*d*): δ 1.41-1.26 (m, 12H), 1.24 (s, 12H), 0.87 (t, *J* = 6.3 Hz, 3H), 0.76 (t, *J* = 7.6 Hz, 2H). <sup>13</sup>C NMR (101 MHz, Chloroform-*d*) δ 82.8, 32.4, 31.9, 29.4, 29.3, 24.8, 24.0, 22.7,

14.1.

**4,4,5,5-Tetramethyl-2-((2,6,6-trimethylcyclohex-1-en-1-yl)methyl)-1,3,2-dioxaborolane (2u)<sup>17</sup>**

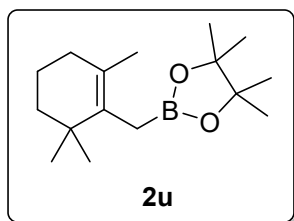

20 mg, 25% isolated yield, colorless oil. <sup>1</sup>H NMR (400 MHz, Chloroform-*d*): δ 1.94 (t, *J* = 6.2 Hz, 2H), 1.59-1.56 (m, 4H), 1.54 (s, 3H), 1.44-1.41 (m, 2H), 1.22 (s, 12H), 0.96 (s, 6H). <sup>13</sup>C NMR (101 MHz, Chloroform-*d*) δ 133.7, 124.6, 82.8, 39.6, 34.8, 32.7, 28.2, 24.7,

20.3, 19.7.

**1,2-Bis(2,6,6-trimethylcyclohex-1-en-1-yl)ethane (2u')<sup>18</sup>**

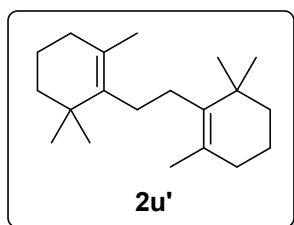

25 mg, 61% isolated yield, white solid. <sup>1</sup>H NMR (400 MHz, Chloroform-*d*): δ 2.06 (s, 4H), 1.94 (t, *J* = 6.3 Hz, 4H), 1.71 (s, 6H), 1.57 (tq, *J* = 6.3, 2.8 Hz, 4H), 1.43-1.40 (m, 4H), 1.05 (s, 12H). <sup>13</sup>C NMR (101 MHz, Chloroform-*d*) δ 137.9, 127.3, 40.4, 35.0, 33.3, 29.1, 29.0, 20.6, 19.6.

---

**1,2-Bis(2,6,6-trimethylcyclohex-1-en-1-yl)ethane (4)<sup>19</sup>**

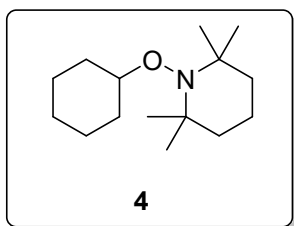

20 mg, 28% isolated yield, colorless oil. <sup>1</sup>H NMR (400 MHz, Chloroform-*d*): δ 2.05-1.93 (m, 2H), 1.84-1.58 (m, 6H), 1.24 (s, 12H), 1.04-0.93 (m, 1H).

## 2 Additional mechanism explorations

$\Delta G$  kcal/mol (opt & freq B3LYP/6-31+g\* // sp M062X/6-311++g\*\* scrf (SMD, solvent=DMF))

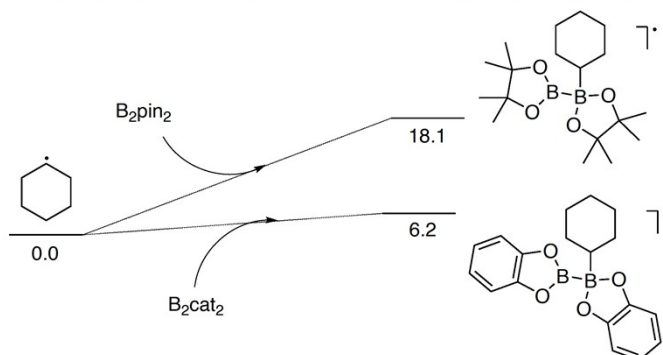

**Scheme S1.** DFT calculated Gibbs energy change of the reaction between cyclohexyl radical and different diboron reagents.

<sup>a</sup> Conditions: the Gibbs free energies were calculated under B3LYP/6-31+g\* level for optimization and frequency analysis and M062x/6-311++g\*\* level with an implicit solvation model SMD (solvent = DMF) for single point calculations.

a. from esters

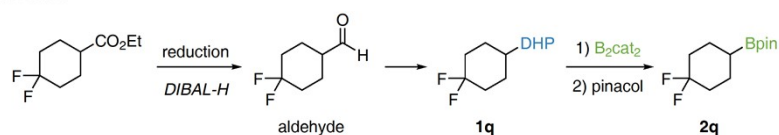

b. from lactones

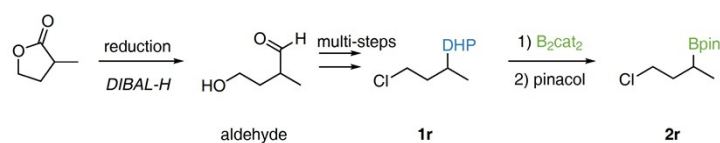

**Scheme S2.** The pre-conversion of this borylation reaction from (a) esters and (b) lactones.

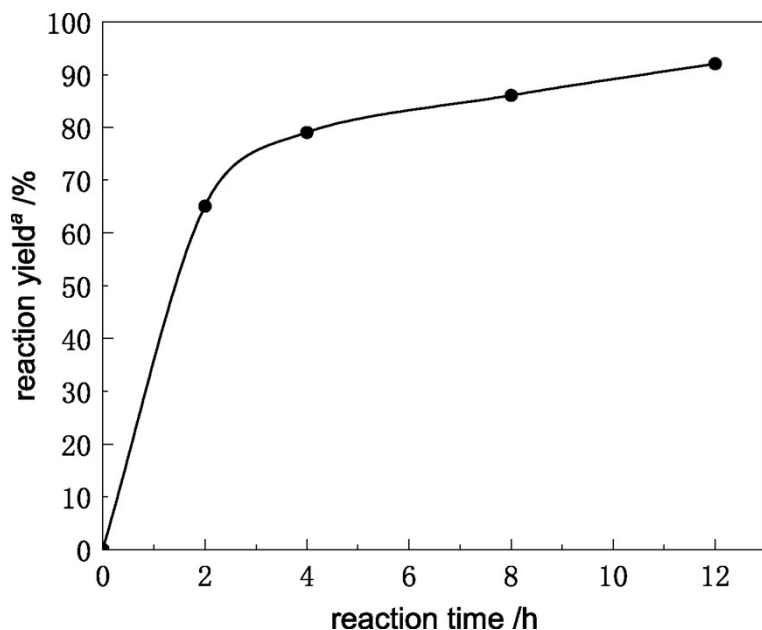

**Scheme S3.** The control experiment of reaction time.

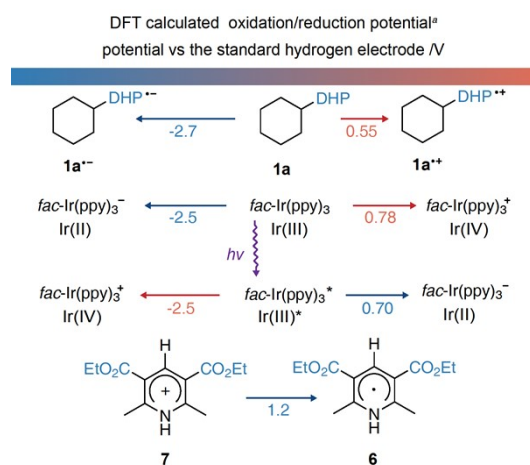

**Scheme S4.** DFT calculated redox potentials.

<sup>a</sup> Conditions: the Gibbs free energies were calculated under B3LYP/6-31+g\* level for optimization and frequency analysis and M062x/6-311++g\*\* level with an implicit solvation model SMD (solvent = DMF) for single point calculations.

## Peking University Mass Spectrometry Sample Analysis Report

### Analysis Info

Analysis Name FTMS-23090132\_Pos\_20230919\_000010.d  
Sample lc-730  
Comment

Acquisition Date 9/19/2023 2:32:50 PM  
Instrument Bruker Solarix XR FTMS  
Operator Peking University

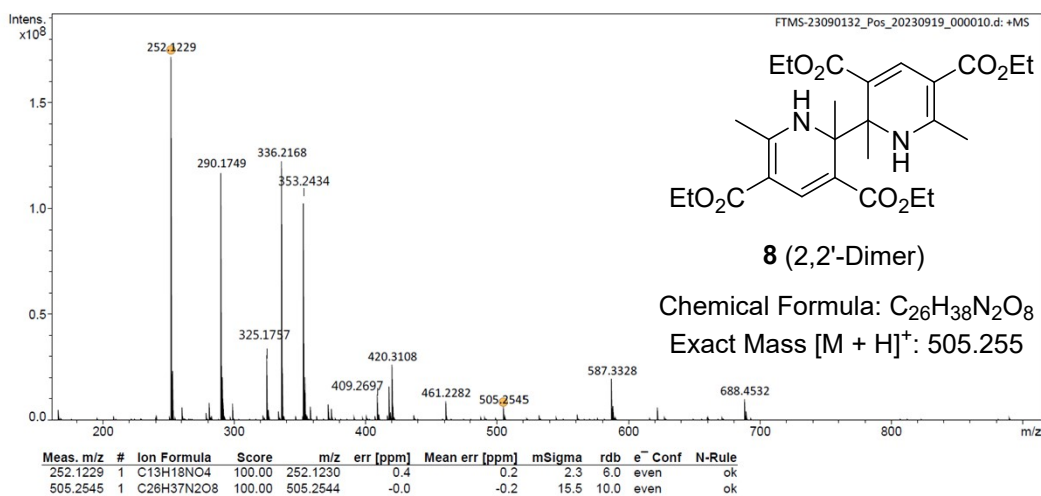

**Scheme S5.** Mass spectrometry of the reaction systems.

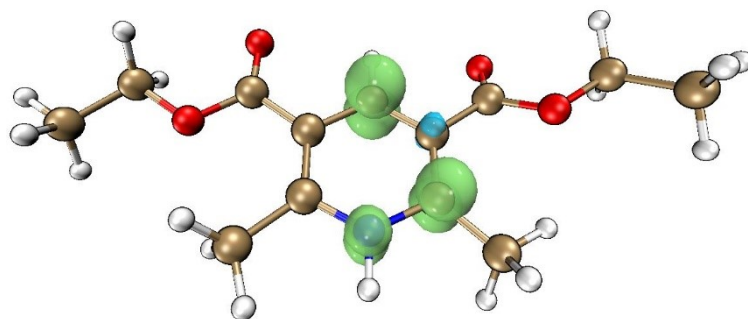

**Scheme S6.** The spin density of **6**.

### 3 DFT calculations

All density functional theory (DFT) calculations were performed with Gaussian 09w<sup>20</sup> and supported by National Supercomputing Center in Shenzhen. All geometry optimizations and vibrational frequency analysis were computed at the B3LYP level of theory with 6-31+G\* basis set.

On the basis of the gas phase optimized structures, the single point (SP) energies were calculated with the M062X functional and basis set of 6-311++G\*\* basis set, and solvent energy corrections were calculated using the SMD model with DMF as the solvent. All time dependent DFT (TD-DFT) calculations were completed at the B3LYP /6-311+G\*\* level with a SMD solvation model. For iridium atoms, a basis set of SDD potential function was applied.

**Table S1.** Energies and lowest frequencies.

| species                                                | TCG      | sp           | G            | lowest Freq/nm |
|--------------------------------------------------------|----------|--------------|--------------|----------------|
| <b>1a</b>                                              | 0.403875 | -1097.011032 | -1096.607157 | 20.19          |
| <b>1a<sup>•+</sup></b>                                 | 0.401816 | -1096.825547 | -1096.423731 | 16.78          |
| <b>cyclohexyl radical</b>                              | 0.124925 | -235.149328  | -235.024403  | 73.34          |
| <b>7</b>                                               | 0.250578 | -861.658481  | -861.407903  | 17.37          |
| <b>B2cat2</b>                                          | 0.146094 | -812.80245   | -812.656356  | 23.17          |
| <b>cyclohexyl B<sub>2</sub>CAT<sub>2</sub> radical</b> | 0.294709 | -1047.965446 | -1047.670737 | 14.79          |
| <b>cyclohexyl Bcat</b>                                 | 0.214056 | -641.629342  | -641.415286  | 22.36          |
| <b>BcatDMF radical</b>                                 | 0.156213 | -654.859956  | -654.703743  | 29.03          |
| <b>DMF</b>                                             | 0.07346  | -248.482303  | -248.408843  | 106.86         |
| <b>6</b>                                               | 0.244092 | -861.771323  | -861.527231  | 19.22          |
| <b>8</b>                                               | 0.525904 | -1723.610699 | -1723.084795 | 13.76          |
| <b>Ir(III)</b>                                         | 0.422268 | -1540.370405 | -1539.948137 | 33.38          |
| <b>Ir(III)*</b>                                        | 0.420909 | -1540.249792 | -1539.828883 | 19.74          |
| <b>Ir(II)</b>                                          | 0.414269 | -1540.432067 | -1540.017798 | 27.74          |
| <b>TS_B2cat2cyDMF_rad</b>                              | 0.390785 | -1296.474188 | -1296.083403 | -390.05        |
| <b>B<sub>2</sub>pin<sub>2</sub></b>                    | 0.316703 | -822.44382   | -822.127117  | 12.50          |
| <b>cyclohexyl B<sub>2</sub>pin<sub>2</sub> radical</b> | 0.467012 | -1057.589652 | -1057.12264  | 13.80          |

**Table S2.** Energies and lowest frequencies (Scheme S4).

| species               | TCG      | sp           | G            | lowest Freq |
|-----------------------|----------|--------------|--------------|-------------|
| <b>Ir(IV)</b>         | 0.421076 | -1540.177123 | -1539.756047 | 23.97       |
| <b>1a<sup>-</sup></b> | 0.397795 | -1097.068934 | -1096.671139 | 27.38       |

---

**Table S3.** TD-DFT energies (Scheme 6b).

| species | T1/eV  | S1/eV  |
|---------|--------|--------|
| Ir(III) | 2.7205 | 3.0167 |
| 1a      | 3.1446 | 4.1939 |

**Cartesian coordinates of the structures**

**1a**

|   |             |             |             |
|---|-------------|-------------|-------------|
| C | -1.91354500 | -1.48864600 | -0.95118900 |
| C | -1.31186000 | -0.35566900 | -0.47251500 |
| C | 0.16278900  | -0.23941500 | -0.88639500 |
| H | 0.12573900  | -0.35215000 | -1.98551600 |
| C | 0.84510900  | -1.54224500 | -0.43817900 |
| C | 0.22467800  | -2.66065500 | -0.90098000 |
| N | -1.05396100 | -2.47212200 | -1.45494400 |
| H | -1.50202500 | -3.30793900 | -1.80945900 |
| C | -1.95171000 | 0.57983900  | 0.46679200  |
| C | 2.00102600  | -1.65360900 | 0.47884100  |
| O | -1.35011500 | 1.33554900  | 1.21416300  |
| O | 2.88985600  | -2.49197500 | 0.41906600  |
| O | -3.31646400 | 0.53039400  | 0.45756200  |
| O | 1.95586700  | -0.71675800 | 1.45548800  |
| C | -3.98600100 | 1.40465000  | 1.39492200  |
| H | -3.65111800 | 1.15834200  | 2.40792500  |
| H | -3.68805200 | 2.43769300  | 1.18857800  |

---

|   |             |             |             |
|---|-------------|-------------|-------------|
| C | -5.48158800 | 1.20354700  | 1.22646500  |
| H | -5.76946100 | 0.16816400  | 1.44020200  |
| H | -6.02137500 | 1.85844600  | 1.92067300  |
| H | -5.80083200 | 1.44859300  | 0.20736800  |
| C | 3.03634300  | -0.73202200 | 2.41727700  |
| H | 3.98282300  | -0.58855400 | 1.88430800  |
| H | 3.06824100  | -1.71756200 | 2.89324600  |
| C | 2.77119500  | 0.37627100  | 3.42011000  |
| H | 3.56796700  | 0.38853300  | 4.17343000  |
| H | 2.74455300  | 1.35497300  | 2.92966200  |
| H | 1.81412500  | 0.22338900  | 3.92984800  |
| C | 0.90545200  | 1.10144700  | -0.69165500 |
| H | 0.93953700  | 1.35094100  | 0.37064400  |
| C | 2.35884800  | 1.00793400  | -1.24601400 |
| H | 3.02145800  | 0.61161300  | -0.46901400 |
| H | 2.39494600  | 0.28921200  | -2.07739800 |
| C | 0.18313000  | 2.24637200  | -1.43226000 |
| H | 0.25340000  | 2.06237300  | -2.51547600 |
| H | -0.88422000 | 2.27008100  | -1.19565500 |
| C | 2.91726800  | 2.36937900  | -1.72962700 |
| H | 2.66374900  | 2.52866500  | -2.78734300 |
| H | 4.01362100  | 2.35800300  | -1.67865900 |
| C | 0.80913300  | 3.61667900  | -1.08915400 |
| H | 0.57102600  | 4.33000500  | -1.88998700 |
| H | 0.34782600  | 4.00935800  | -0.17412300 |
| C | 2.34342200  | 3.52645600  | -0.90203400 |
| H | 2.81959400  | 4.47654200  | -1.17632000 |
| H | 2.58188100  | 3.35760300  | 0.15764400  |
| C | 0.66649800  | -4.09539900 | -0.82214100 |



---

|   |             |             |             |
|---|-------------|-------------|-------------|
| H | 1.67991500  | -4.16839600 | -0.42986200 |
| H | -0.01139100 | -4.68566600 | -0.18972400 |
| H | 0.65651500  | -4.54447700 | -1.82557900 |
| C | -3.36957400 | -1.88069900 | -0.94962400 |
| H | -3.67645400 | -2.26036900 | 0.03332500  |
| H | -4.01617400 | -1.03797600 | -1.19088300 |
| H | -3.54490700 | -2.67755100 | -1.68331800 |

**1a<sup>+</sup>**

|   |             |             |             |
|---|-------------|-------------|-------------|
| C | 0.92646400  | 2.07529100  | 1.28484800  |
| C | 1.24326200  | 1.14986700  | 0.30554400  |
| C | 0.20628700  | 0.19288200  | -0.16053600 |
| H | 0.39871400  | -0.14183300 | -1.18133500 |
| C | -1.18445900 | 0.71159100  | -0.03206300 |
| C | -1.47630100 | 1.64241700  | 0.94593300  |
| N | -0.40242700 | 2.18463200  | 1.61935700  |
| H | -0.62397200 | 2.85714100  | 2.34888700  |
| C | 2.63170500  | 1.10774700  | -0.25418400 |
| C | -2.17703100 | 0.20265000  | -1.03388900 |
| O | 3.59064500  | 1.63674900  | 0.27910600  |
| O | -1.81189900 | -0.24864500 | -2.10337900 |
| O | 2.67015500  | 0.44949800  | -1.41606400 |
| O | -3.45158000 | 0.30965500  | -0.64697400 |
| C | 3.97015600  | 0.37538200  | -2.08967800 |
| H | 4.33002700  | 1.39832700  | -2.23061600 |
| H | 4.66240800  | -0.14312600 | -1.41998000 |
| C | 3.76575800  | -0.35533100 | -3.40030800 |
| H | 3.05868400  | 0.17602300  | -4.04536500 |

---

|   |             |             |             |
|---|-------------|-------------|-------------|
| H | 4.72443600  | -0.42176700 | -3.92638800 |
| H | 3.39635600  | -1.37300800 | -3.23709200 |
| C | -4.46476000 | -0.15338800 | -1.60454100 |
| H | -4.24933800 | -1.20031600 | -1.83433600 |
| H | -4.34675000 | 0.43145500  | -2.52086000 |
| C | -5.82388300 | 0.03296200  | -0.96314500 |
| H | -6.59716600 | -0.31154600 | -1.65843600 |
| H | -5.91325300 | -0.55058900 | -0.04097700 |
| H | -6.01926000 | 1.08621500  | -0.73618500 |
| C | 0.30943300  | -1.19456900 | 0.76333000  |
| H | 0.05110900  | -0.85214900 | 1.77424500  |
| C | -0.72066000 | -2.24123500 | 0.28137700  |
| H | -1.70671700 | -1.99460900 | 0.69588400  |
| H | -0.81733000 | -2.20243900 | -0.80892300 |
| C | 1.71544800  | -1.80277300 | 0.79758100  |
| H | 1.95661400  | -2.20951800 | -0.19203000 |
| H | 2.48569200  | -1.06243400 | 1.03155500  |
| C | -0.32733000 | -3.68386500 | 0.69510000  |
| H | 0.29314400  | -4.13720700 | -0.08878300 |
| H | -1.23460100 | -4.29550300 | 0.75824700  |
| C | 1.77384200  | -2.92412600 | 1.87497100  |
| H | 2.58206300  | -3.61150300 | 1.59818500  |
| H | 2.05746500  | -2.48655400 | 2.83997900  |
| C | 0.44283500  | -3.69613800 | 2.01854100  |
| H | 0.63725900  | -4.72445800 | 2.34244500  |
| H | -0.17799000 | -3.24207600 | 2.80370700  |
| C | -2.82259400 | 2.18393100  | 1.34413200  |
| H | -3.32008600 | 2.65465700  | 0.49126400  |
| H | -3.47941500 | 1.38453600  | 1.69525300  |

---

|   |             |            |            |
|---|-------------|------------|------------|
| H | -2.72596400 | 2.93218700 | 2.13746800 |
| C | 1.85949500  | 3.01152900 | 1.99964000 |
| H | 2.64843100  | 2.46002500 | 2.51663500 |
| H | 2.36454900  | 3.67349300 | 1.28938200 |
| H | 1.31730500  | 3.62715400 | 2.72524200 |

**cyclohexyl radical**

|   |             |             |             |
|---|-------------|-------------|-------------|
| C | 0.39025100  | -1.37807200 | 0.26930000  |
| H | 0.61683000  | -2.36233900 | 0.67288900  |
| C | 1.48849500  | -0.36824700 | 0.11714300  |
| H | 1.98161600  | -0.19792200 | 1.09024400  |
| H | 2.28900400  | -0.74770200 | -0.54417600 |
| C | -0.95696200 | -1.08422900 | -0.31011200 |
| H | -0.90090400 | -1.13541000 | -1.41495700 |
| H | -1.68467400 | -1.85126300 | -0.02009200 |
| C | 0.94791200  | 0.97095000  | -0.42093400 |
| H | 0.74457600  | 0.88738100  | -1.49840700 |
| H | 1.70608600  | 1.75611900  | -0.30825700 |
| C | -1.48153100 | 0.33025900  | 0.07868000  |
| H | -2.14723300 | 0.68964000  | -0.71710000 |
| H | -2.09605700 | 0.25278900  | 0.98409100  |
| C | -0.34202200 | 1.35372000  | 0.32107200  |
| H | -0.67201800 | 2.35880200  | 0.02945500  |
| H | -0.11407800 | 1.40361600  | 1.39541200  |

7

|   |            |             |            |
|---|------------|-------------|------------|
| C | 1.22492800 | 1.35515600  | 0.00016300 |
| C | 1.23010900 | -0.04415100 | 0.00026200 |

---

|   |             |             |             |
|---|-------------|-------------|-------------|
| C | -0.00001000 | -0.71140200 | 0.00023900  |
| H | -0.00003000 | -1.79789200 | 0.00021800  |
| C | -1.23011100 | -0.04416700 | 0.00021300  |
| C | -1.22492900 | 1.35514300  | 0.00021100  |
| N | -0.00000200 | 1.95442200  | 0.00020100  |
| H | 0.00000200  | 2.97186600  | 0.00020100  |
| C | 2.45964200  | -0.92775100 | 0.00024700  |
| C | -2.45963700 | -0.92776300 | 0.00019100  |
| O | 2.36149300  | -2.13520400 | -0.00003500 |
| O | -2.36147800 | -2.13521500 | 0.00061000  |
| O | 3.60497500  | -0.24443900 | 0.00056700  |
| O | -3.60496200 | -0.24444600 | -0.00040200 |
| C | 4.83956700  | -1.04733000 | 0.00028100  |
| H | 4.81581000  | -1.68462500 | 0.88793600  |
| H | 4.81460800  | -1.68607100 | -0.88628100 |
| C | 6.01161900  | -0.08935600 | -0.00124000 |
| H | 6.01020000  | 0.54741100  | 0.88962000  |
| H | 6.94261800  | -0.66659800 | -0.00130300 |
| H | 6.00911100  | 0.54587100  | -0.89319800 |
| C | -4.83956600 | -1.04732300 | -0.00054800 |
| H | -4.81529700 | -1.68540200 | 0.88652000  |
| H | -4.81512300 | -1.68528900 | -0.88769500 |
| C | -6.01160700 | -0.08934200 | -0.00059600 |
| H | -6.94260900 | -0.66658100 | -0.00073500 |
| H | -6.00973100 | 0.54658000  | 0.89086800  |
| H | -6.00955600 | 0.54673300  | -0.89194900 |
| C | -2.40538900 | 2.27969700  | 0.00041600  |
| H | -3.03322900 | 2.10203600  | -0.87703600 |
| H | -3.03383600 | 2.10087200  | 0.87716700  |

---

|   |             |            |             |
|---|-------------|------------|-------------|
| H | -2.08838600 | 3.32730300 | 0.00119000  |
| C | 2.40536600  | 2.27974000 | -0.00016900 |
| H | 3.03353400  | 2.10186900 | 0.87697500  |
| H | 3.03349700  | 2.10115800 | -0.87722800 |
| H | 2.08833200  | 3.32733500 | -0.00061400 |

B<sub>2</sub>cat<sub>2</sub>

|   |             |             |             |
|---|-------------|-------------|-------------|
| C | -2.94143900 | 0.69761900  | -0.00047100 |
| C | -2.94143800 | -0.69761900 | -0.00052500 |
| C | -4.11511900 | -1.43445900 | -0.00074600 |
| C | -5.31160500 | -0.70157500 | -0.00091200 |
| C | -5.31160600 | 0.70157300  | -0.00085800 |
| C | -4.11512000 | 1.43445900  | -0.00063400 |
| H | -4.10272600 | -2.51972500 | -0.00078600 |
| H | -6.25829000 | -1.23447700 | -0.00108800 |
| H | -6.25829200 | 1.23447300  | -0.00099300 |
| H | -4.10272900 | 2.51972400  | -0.00059100 |
| C | 2.94143900  | -0.69761900 | 0.00046900  |
| C | 2.94143800  | 0.69761900  | 0.00052300  |
| C | 4.11512000  | -1.43445900 | 0.00064000  |
| C | 4.11511900  | 1.43445900  | 0.00075000  |
| C | 5.31160600  | -0.70157300 | 0.00086900  |
| H | 4.10272900  | -2.51972400 | 0.00059700  |
| C | 5.31160500  | 0.70157500  | 0.00092300  |
| H | 4.10272600  | 2.51972500  | 0.00079000  |
| H | 6.25829200  | -1.23447300 | 0.00100900  |
| H | 6.25829000  | 1.23447700  | 0.00110400  |
| B | -0.84340400 | 0.00000300  | -0.00014900 |
| B | 0.84340400  | -0.00000300 | 0.00012700  |

---

|   |             |             |             |
|---|-------------|-------------|-------------|
| O | 1.63583300  | -1.14455800 | 0.00023200  |
| O | 1.63583200  | 1.14455500  | 0.00032100  |
| O | -1.63583200 | -1.14455500 | -0.00032700 |
| O | -1.63583300 | 1.14455800  | -0.00023800 |

**cyclohexyl B<sub>2</sub>cat<sub>2</sub> radical**

|   |             |             |             |
|---|-------------|-------------|-------------|
| C | 3.15697100  | -0.57863500 | 0.67275200  |
| C | 3.30922500  | -0.12132100 | -0.63644000 |
| C | 4.55367800  | -0.00121900 | -1.23317500 |
| C | 5.66202500  | -0.36310700 | -0.45045300 |
| C | 5.50911200  | -0.82108100 | 0.86580500  |
| C | 4.24075100  | -0.93818500 | 1.45705400  |
| H | 4.66056300  | 0.35482400  | -2.25302700 |
| H | 6.65865800  | -0.28532000 | -0.87610400 |
| H | 6.38919800  | -1.09215400 | 1.44240600  |
| H | 4.11024700  | -1.29183900 | 2.47499500  |
| C | -1.96092300 | -1.70420000 | -0.76649700 |
| C | -2.08022500 | -1.39189900 | 0.62079100  |
| C | -2.69512000 | -2.75061000 | -1.34269500 |
| C | -2.93809700 | -2.11807200 | 1.45895400  |
| C | -3.54327700 | -3.46341100 | -0.50259700 |
| H | -2.59539600 | -2.98149100 | -2.39835300 |
| C | -3.66250900 | -3.15227500 | 0.87683400  |
| H | -3.02002500 | -1.87415300 | 2.51318800  |
| H | -4.13119400 | -4.28185600 | -0.90851900 |
| H | -4.33813000 | -3.74112000 | 1.49086800  |
| B | 1.14547900  | -0.13611700 | -0.14927200 |
| B | -0.57040700 | 0.06460900  | -0.30812700 |

---

|   |             |             |             |
|---|-------------|-------------|-------------|
| O | -1.09587300 | -0.89243600 | -1.35068700 |
| O | -1.29284600 | -0.37753600 | 0.93567400  |
| O | 2.06314800  | 0.16033300  | -1.15970600 |
| O | 1.81262000  | -0.59389700 | 0.98839500  |
| C | -0.93822300 | 1.63364200  | -0.70634500 |
| H | -0.48578300 | 1.77099000  | -1.69877200 |
| C | -0.27773400 | 2.64033500  | 0.26547400  |
| H | -0.36757500 | 2.29349000  | 1.30504300  |
| H | 0.79752500  | 2.70569300  | 0.05473000  |
| C | -2.47174700 | 1.87496900  | -0.82246800 |
| H | -2.67376800 | 2.48669200  | -1.71503100 |
| H | -3.01456100 | 0.93498600  | -0.98901800 |
| C | -3.03812100 | 2.59330700  | 0.41132500  |
| H | -4.13056500 | 2.67396800  | 0.33698100  |
| H | -2.83520000 | 1.98164800  | 1.30025800  |
| C | -0.92795300 | 4.02865300  | 0.14554600  |
| H | -0.85491000 | 4.35850400  | -0.90053600 |
| H | -0.37030100 | 4.76523500  | 0.73833700  |
| C | -2.41265000 | 3.99566100  | 0.58805900  |
| H | -2.98360200 | 4.73361200  | 0.00849300  |
| H | -2.49804100 | 4.29879900  | 1.64010000  |

**cyclohexyl Bcat**

|   |             |             |             |
|---|-------------|-------------|-------------|
| B | -0.05805300 | -0.12804300 | -0.24115300 |
| C | 3.09556800  | 1.38500700  | 0.50534000  |
| C | 4.34297700  | 0.75295900  | 0.37408100  |
| C | 4.44789100  | -0.56982900 | -0.07725300 |
| C | 3.31013100  | -1.31976700 | -0.41749100 |

---

|   |             |             |             |
|---|-------------|-------------|-------------|
| C | 2.08719800  | -0.68408300 | -0.28223500 |
| C | 1.98297800  | 0.63316600  | 0.16696400  |
| H | 3.00273900  | 2.40894500  | 0.85335800  |
| H | 5.24439300  | 1.30345300  | 0.62847000  |
| H | 5.42932000  | -1.02708000 | -0.16690900 |
| H | 3.37966600  | -2.34445800 | -0.76874300 |
| O | 0.82179800  | -1.17023100 | -0.54319200 |
| O | 0.65032900  | 0.99305500  | 0.19566200  |
| C | -1.61644300 | -0.23144900 | -0.33859200 |
| H | -1.83863900 | -1.00004100 | -1.09451900 |
| C | -2.29977800 | 1.10317200  | -0.76102600 |
| H | -1.74102800 | 1.95641300  | -0.35700600 |
| H | -2.24879900 | 1.19320100  | -1.85459200 |
| C | -2.22931900 | -0.73462800 | 0.99838600  |
| H | -1.68773000 | -1.61214300 | 1.37347200  |
| H | -2.10591700 | 0.05015100  | 1.75729600  |
| C | -3.73012600 | -1.07919700 | 0.83058800  |
| H | -3.83763900 | -2.13691300 | 0.55604700  |
| H | -4.23437600 | -0.95888200 | 1.79895200  |
| C | -3.77559200 | 1.19264300  | -0.29981000 |
| H | -3.82867500 | 1.65604800  | 0.69574500  |
| H | -4.33704500 | 1.85274700  | -0.97300100 |
| C | -4.42274100 | -0.19695800 | -0.23542100 |
| H | -5.49572900 | -0.11788800 | -0.02008400 |
| H | -4.34374700 | -0.67215000 | -1.22367600 |

**BcatDMF radical**

|   |             |            |             |
|---|-------------|------------|-------------|
| C | -2.87676600 | 1.52563300 | -0.10991900 |
|---|-------------|------------|-------------|



---

|   |             |             |             |
|---|-------------|-------------|-------------|
| C | -1.81154000 | 0.64563900  | -0.04322900 |
| C | -1.99453500 | -0.73649100 | 0.05434200  |
| C | -3.25508100 | -1.30671100 | 0.09000300  |
| C | -4.34748800 | -0.42497200 | 0.02334500  |
| C | -4.16294800 | 0.95970500  | -0.07439800 |
| H | -2.72137700 | 2.59718400  | -0.18581800 |
| H | -3.38647000 | -2.38146400 | 0.16541000  |
| H | -5.35547100 | -0.82945300 | 0.04804400  |
| H | -5.02958700 | 1.61290700  | -0.12405800 |
| O | -0.76372600 | -1.36074500 | 0.10226400  |
| O | -0.45637200 | 0.92530400  | -0.05780600 |
| B | 0.16481100  | -0.32245600 | 0.03506700  |
| O | 1.49469400  | -0.54165400 | 0.06845900  |
| C | 2.43141400  | 0.47289200  | -0.10568600 |
| N | 3.72718000  | 0.08656900  | 0.22259100  |
| C | 4.71126700  | 1.15834200  | 0.15138000  |
| H | 5.62123000  | 0.84475100  | 0.67248200  |
| H | 4.97281500  | 1.41899300  | -0.88846100 |
| H | 4.32183300  | 2.05285100  | 0.64756900  |
| C | 4.19964400  | -1.19069600 | -0.30693800 |
| H | 3.44137500  | -1.95789000 | -0.14483300 |
| H | 4.41913400  | -1.12906800 | -1.38719900 |
| H | 5.11282700  | -1.47789100 | 0.22354800  |
| H | 2.12880100  | 1.45208200  | 0.26310500  |

**DMF**

|   |            |             |            |
|---|------------|-------------|------------|
| O | 1.95781700 | -0.09395200 | 0.00001100 |
| C | 0.86558600 | -0.64685800 | 0.00001300 |

---

|   |             |             |             |
|---|-------------|-------------|-------------|
| N | -0.34550600 | -0.01996800 | -0.00019100 |
| C | -1.59158100 | -0.76503000 | 0.00002700  |
| H | -2.18889500 | -0.52809200 | 0.89070700  |
| H | -2.18929700 | -0.52803700 | -0.89036800 |
| H | -1.37962300 | -1.83823200 | -0.00008400 |
| C | -0.42702700 | 1.43269600  | 0.00004600  |
| H | 0.58674100  | 1.83568300  | 0.00097200  |
| H | -0.96033100 | 1.78726700  | -0.89177400 |
| H | -0.96191600 | 1.78678100  | 0.89110500  |
| H | 0.76745900  | -1.74882600 | 0.00018300  |

**6**

|   |             |             |             |
|---|-------------|-------------|-------------|
| C | -1.23994600 | 1.37317300  | -0.22133300 |
| C | -1.24774700 | -0.01695700 | -0.24036200 |
| C | -0.04577600 | -0.74107100 | -0.17174800 |
| H | -0.05788900 | -1.82114500 | -0.20773400 |
| C | 1.22749400  | -0.05736200 | -0.05019800 |
| C | 1.23955400  | 1.32206500  | -0.01828900 |
| N | 0.03408600  | 1.98144700  | -0.11049700 |
| H | 0.05527000  | 2.99160400  | -0.09239000 |
| C | -2.49320900 | -0.84496300 | -0.34253900 |
| C | 2.42204500  | -0.91979500 | 0.03526300  |
| O | -2.52623000 | -1.95299000 | -0.84097700 |
| O | 2.36880800  | -2.14024900 | 0.03908700  |
| O | -3.58154800 | -0.26444000 | 0.21832900  |
| O | 3.60912900  | -0.25099800 | 0.10666500  |
| C | -4.80460600 | -1.04307600 | 0.18364700  |
| H | -5.05567400 | -1.25314800 | -0.86111100 |

---

|   |             |             |             |
|---|-------------|-------------|-------------|
| H | -4.61958300 | -1.99963000 | 0.68204100  |
| C | -5.88367600 | -0.23571900 | 0.88156500  |
| H | -6.06252500 | 0.71623600  | 0.36951800  |
| H | -6.82175100 | -0.80310400 | 0.88481800  |
| H | -5.60688500 | -0.02380800 | 1.91995400  |
| C | 4.79140000  | -1.08000000 | 0.18856000  |
| H | 4.81840100  | -1.74075000 | -0.68380400 |
| H | 4.71792300  | -1.71016300 | 1.08088200  |
| C | 5.99753400  | -0.15927200 | 0.24126900  |
| H | 6.91440000  | -0.75709900 | 0.30462200  |
| H | 6.05817700  | 0.46498000  | -0.65717800 |
| H | 5.95702100  | 0.49741600  | 1.11752300  |
| C | 2.43232900  | 2.23471800  | 0.10542000  |
| H | 3.00712500  | 2.01536600  | 1.00856900  |
| H | 3.11429200  | 2.11082900  | -0.74040000 |
| H | 2.11391100  | 3.28279200  | 0.14308700  |
| C | -2.35906600 | 2.35856200  | -0.34805800 |
| H | -3.30757600 | 1.86634600  | -0.55138500 |
| H | -2.48453300 | 2.94801000  | 0.57498800  |
| H | -2.15796300 | 3.07273900  | -1.16252700 |

**8**

|   |             |             |             |
|---|-------------|-------------|-------------|
| C | -0.24711600 | 1.70167400  | -1.38407700 |
| C | -0.98112300 | 0.65130700  | -1.93382800 |
| C | -0.27553100 | -0.57756100 | -2.14322500 |
| H | -0.77622800 | -1.34105800 | -2.73045600 |
| C | 0.97590300  | -0.84128200 | -1.67097300 |
| C | 1.72414700  | 0.18905200  | -0.81711700 |

---

|   |             |             |             |
|---|-------------|-------------|-------------|
| N | 1.02316800  | 1.47490200  | -0.99836000 |
| H | 1.52922600  | 2.26117900  | -0.60782100 |
| C | -2.38109600 | 0.69006300  | -2.37674000 |
| C | 1.53741400  | -2.15209500 | -2.04771000 |
| O | -2.95804500 | -0.26052600 | -2.88680000 |
| O | 1.11462200  | -2.87977600 | -2.93038600 |
| O | -3.00914500 | 1.87827200  | -2.15897400 |
| O | 2.60179200  | -2.53981000 | -1.26298800 |
| C | -4.40065100 | 1.94068600  | -2.54998800 |
| H | -4.47304500 | 1.74598500  | -3.62502100 |
| H | -4.94695400 | 1.14778000  | -2.02956900 |
| C | -4.91961300 | 3.32005100  | -2.18509400 |
| H | -4.36428300 | 4.10469500  | -2.71108200 |
| H | -5.97595400 | 3.40197100  | -2.46725500 |
| H | -4.83827200 | 3.49989400  | -1.10755000 |
| C | 3.23084300  | -3.79349400 | -1.63309300 |
| H | 3.54594600  | -3.72625700 | -2.67892800 |
| H | 2.48805500  | -4.59434600 | -1.56277800 |
| C | 4.40601900  | -4.02302100 | -0.69973300 |
| H | 4.90243100  | -4.96433400 | -0.96289100 |
| H | 5.14271700  | -3.21621900 | -0.78050700 |
| H | 4.08233800  | -4.09342300 | 0.34499600  |
| C | 3.15109200  | 0.43081600  | -1.36353900 |
| H | 3.62160700  | 1.28232700  | -0.86294900 |
| H | 3.79116200  | -0.44128000 | -1.23763800 |
| H | 3.08427300  | 0.65624500  | -2.43276200 |
| C | -0.71785800 | 3.12111100  | -1.20458900 |
| H | -1.15516300 | 3.51331800  | -2.12467100 |
| H | -1.49633900 | 3.16630900  | -0.43656600 |

---

|   |             |             |             |
|---|-------------|-------------|-------------|
| H | 0.10953900  | 3.76885900  | -0.89661000 |
| C | 1.72370000  | -0.18913100 | 0.81731500  |
| C | 0.97525100  | 0.84135400  | 1.67081400  |
| C | -0.27630000 | 0.57773600  | 2.14283500  |
| H | -0.77707600 | 1.34130600  | 2.72990100  |
| C | -0.98192100 | -0.65111400 | 1.93345900  |
| C | -0.24794900 | -1.70151800 | 1.38374200  |
| N | 1.02236700  | -1.47485100 | 0.99810800  |
| H | 1.52842300  | -2.26119700 | 0.60770400  |
| C | 1.53676000  | 2.15214400  | 2.04764100  |
| C | -2.38188000 | -0.68987600 | 2.37641200  |
| O | 1.11353200  | 2.88009500  | 2.92988700  |
| O | -2.95882800 | 0.26064900  | 2.88657700  |
| O | 2.60178300  | 2.53945700  | 1.26359300  |
| O | -3.00995200 | -1.87805400 | 2.15847400  |
| C | 3.23089100  | 3.79304500  | 1.63393800  |
| H | 2.48826600  | 4.59402400  | 1.56335400  |
| H | 3.54558100  | 3.72574300  | 2.67989400  |
| C | 4.40647700  | 4.02238200  | 0.70104600  |
| H | 4.08321500  | 4.09286100  | -0.34380700 |
| H | 4.90295400  | 4.96360200  | 0.96441200  |
| H | 5.14300000  | 3.21544700  | 0.78208900  |
| C | -4.40144700 | -1.94047600 | 2.54953200  |
| H | -4.94779200 | -1.14765100 | 2.02903500  |
| H | -4.47381700 | -1.74566700 | 3.62454900  |
| C | -4.92035500 | -3.31990200 | 2.18479200  |
| H | -5.97670100 | -3.40181700 | 2.46693800  |
| H | -4.83898100 | -3.49987100 | 1.10727300  |
| H | -4.36501300 | -4.10446300 | 2.71089200  |

---

|   |             |             |            |
|---|-------------|-------------|------------|
| C | -0.71886800 | -3.12087300 | 1.20405400 |
| H | -1.15605900 | -3.51320500 | 2.12414500 |
| H | -1.49750200 | -3.16583300 | 0.43617400 |
| H | 0.10839300  | -3.76865900 | 0.89580100 |
| C | 3.15033200  | -0.43116700 | 1.36443500 |
| H | 3.62100900  | -1.28264500 | 0.86393500 |
| H | 3.79056300  | 0.44088200  | 1.23902800 |
| H | 3.08293800  | -0.65678100 | 2.43358300 |

### **Ir(III)**

|    |             |             |             |
|----|-------------|-------------|-------------|
| Ir | 0.00000000  | 0.00000000  | 0.02331900  |
| C  | -0.87359000 | 2.81896200  | -0.59332000 |
| C  | 0.00000000  | 2.89924300  | 0.58252800  |
| C  | 0.52569200  | 1.66503500  | 1.07082500  |
| C  | -1.51551200 | 3.90988800  | -1.21005900 |
| N  | -1.05300600 | 1.56163100  | -1.09388700 |
| C  | 0.29972800  | 4.12379200  | 1.21271300  |
| C  | 1.35465900  | 1.74157900  | 2.20907900  |
| C  | 1.12162600  | 4.15797300  | 2.33390800  |
| C  | -3.38429000 | -0.05141400 | 2.83069800  |
| C  | -2.51081800 | -1.44962100 | 0.58252800  |
| C  | -2.18558100 | 0.30237900  | 2.20907900  |
| C  | -1.70480900 | -0.37725500 | 1.07082500  |
| N  | 1.87891500  | 0.13111400  | -1.09388700 |
| C  | 2.87808700  | -0.65293000 | -0.59332000 |
| C  | 0.83092200  | -2.04395900 | 2.20907900  |
| C  | 1.17911600  | -1.28778000 | 1.07082500  |
| C  | 2.51081800  | -1.44962100 | 0.58252800  |

---

|   |             |             |             |
|---|-------------|-------------|-------------|
| C | -3.72117200 | -1.80232400 | 1.21271300  |
| C | -4.16172300 | -1.10762900 | 2.33390800  |
| C | 1.73667100  | -2.90517400 | 2.83069800  |
| C | 3.42144400  | -2.32146800 | 1.21271300  |
| C | 3.04009700  | -3.05034300 | 2.33390800  |
| C | 1.64761900  | 2.95658800  | 2.83069800  |
| C | -2.32782800 | 3.70908000  | -2.31881700 |
| C | -1.84609000 | 1.37199000  | -2.16322200 |
| C | -2.00449800 | -2.16603200 | -0.59332000 |
| C | 2.11122300  | 0.91276600  | -2.16322200 |
| C | 4.14381800  | -0.64247300 | -1.21005900 |
| C | -2.50143200 | 2.41111700  | -2.81281200 |
| C | -2.62830700 | -3.26741600 | -1.21005900 |
| N | -0.82590900 | -1.69274500 | -1.09388700 |
| C | 3.33880500  | 0.96074500  | -2.81281200 |
| C | 4.37607100  | 0.16141800  | -2.31881700 |
| C | -2.04824300 | -3.87049800 | -2.31881700 |
| C | -0.26513300 | -2.28475600 | -2.16322200 |
| C | -0.83737300 | -3.37186200 | -2.81281200 |
| H | -1.37900700 | 4.90948900  | -0.81315000 |
| H | -0.10759800 | 5.05720700  | 0.83159500  |
| H | 1.77361700  | 0.82872400  | 2.62266700  |
| H | 1.34975400  | 5.10441400  | 2.81738500  |
| H | -3.71726600 | 0.49798400  | 3.70946000  |
| H | -1.60450400 | 1.12163500  | 2.62266700  |
| H | -0.16911300 | -1.95035900 | 2.62266700  |
| H | -4.32587100 | -2.62178600 | 0.83159500  |
| H | -5.09542900 | -1.38328600 | 2.81738500  |
| H | 1.42736600  | -3.46823900 | 3.70946000  |

---

|   |             |             |             |
|---|-------------|-------------|-------------|
| H | 4.43346900  | -2.43542100 | 0.83159500  |
| H | 3.74567500  | -3.72112800 | 2.81738500  |
| H | 2.28990000  | 2.97025500  | 3.70946000  |
| H | -2.82456300 | 4.55231700  | -2.79170200 |
| H | -1.95138400 | 0.34391900  | -2.49491900 |
| H | 1.27353500  | 1.51798800  | -2.49491900 |
| H | 4.94124600  | -1.26049000 | -0.81315000 |
| H | -3.13208700 | 2.20508800  | -3.67178600 |
| H | -3.56223900 | -3.64900000 | -0.81315000 |
| H | 3.47570500  | 1.60992300  | -3.67178600 |
| H | 5.35470300  | 0.16998500  | -2.79170200 |
| H | -2.53014000 | -4.72230200 | -2.79170200 |
| H | 0.67784900  | -1.86190800 | -2.49491900 |
| H | -0.34361900 | -3.81501000 | -3.67178600 |

**Ir(III)\***

|    |             |             |             |
|----|-------------|-------------|-------------|
| Ir | -0.00873400 | -0.00553800 | -0.09791200 |
| C  | 2.89893900  | -0.43704300 | 0.58424600  |
| C  | 2.87179200  | 0.41050500  | -0.59857100 |
| C  | 1.57849900  | 0.79033000  | -1.09400700 |
| C  | 4.06249700  | -0.86975300 | 1.25801800  |
| N  | 1.66116600  | -0.81574300 | 1.06219300  |
| C  | 4.04081200  | 0.88949800  | -1.23604300 |
| C  | 1.52600800  | 1.67287900  | -2.18878000 |
| C  | 3.94912800  | 1.73801200  | -2.33585600 |
| C  | 0.48206600  | -3.39664900 | -2.83734000 |
| C  | -1.09073000 | -2.70289800 | -0.60969800 |
| C  | 0.67063400  | -2.16277200 | -2.20283600 |



---

|   |             |             |             |
|---|-------------|-------------|-------------|
| C | -0.11302800 | -1.77176600 | -1.10111700 |
| N | -0.12831500 | 1.85207700  | 1.05359100  |
| C | -1.06245700 | 2.74150400  | 0.56569600  |
| C | -2.22827200 | 0.48927100  | -2.19059800 |
| C | -1.48250400 | 0.97548600  | -1.10046300 |
| C | -1.78071200 | 2.29544800  | -0.61826800 |
| C | -1.27199700 | -3.94720700 | -1.25755200 |
| C | -0.49664300 | -4.28707600 | -2.36254800 |
| C | -3.19663800 | 1.27556700  | -2.82656100 |
| C | -2.75964300 | 3.08157400  | -1.26991500 |
| C | -3.45579600 | 2.57788500  | -2.36508000 |
| C | 2.68958400  | 2.13713600  | -2.81455900 |
| C | 3.96267700  | -1.68979800 | 2.37004000  |
| C | 1.57341600  | -1.62022900 | 2.13884400  |
| C | -1.83165600 | -2.31016200 | 0.57829900  |
| C | 0.60896400  | 2.17734100  | 2.13247500  |
| C | -1.26192200 | 3.97184900  | 1.22973400  |
| C | 2.68622200  | -2.08543100 | 2.82337000  |
| C | -2.77014000 | -3.11318000 | 1.26306500  |
| N | -1.55040400 | -1.04533400 | 1.05059800  |
| C | 0.46565800  | 3.38122500  | 2.80668700  |
| C | -0.50325900 | 4.29580600  | 2.34265300  |
| C | -3.42537600 | -2.62281400 | 2.38078800  |
| C | -2.19733800 | -0.57334300 | 2.13356000  |
| C | -3.14224000 | -1.31441000 | 2.82771700  |
| H | 5.03887400  | -0.55880700 | 0.90204200  |
| H | 5.02383300  | 0.59922500  | -0.87531800 |
| H | 0.56131400  | 1.98484100  | -2.57968300 |
| H | 4.85576600  | 2.09399200  | -2.81975500 |

---

|   |             |             |             |
|---|-------------|-------------|-------------|
| H | 1.08950500  | -3.66253000 | -3.69980400 |
| H | 1.42176400  | -1.48217700 | -2.59398200 |
| H | -2.03102200 | -0.50906000 | -2.57137300 |
| H | -2.02097600 | -4.64890600 | -0.90016000 |
| H | -0.64934500 | -5.24450100 | -2.85547400 |
| H | -3.74353400 | 0.87973800  | -3.67962200 |
| H | -2.97651100 | 4.08800500  | -0.92206700 |
| H | -4.20335000 | 3.19427600  | -2.85909700 |
| H | 2.61675200  | 2.80296500  | -3.67186700 |
| H | 4.85934400  | -2.02330200 | 2.88541300  |
| H | 0.56952600  | -1.88746700 | 2.45273000  |
| H | 1.33119600  | 1.43557200  | 2.45761500  |
| H | -2.01381600 | 4.66397100  | 0.86564300  |
| H | 2.56154000  | -2.73484900 | 3.68382700  |
| H | -2.97332500 | -4.11956100 | 0.91250900  |
| H | 1.08838100  | 3.59733400  | 3.66883900  |
| H | -0.65540600 | 5.24381900  | 2.85160800  |
| H | -4.14787400 | -3.24137000 | 2.90635800  |
| H | -1.93384800 | 0.43262100  | 2.44413800  |
| H | -3.63904700 | -0.88607600 | 3.69229900  |

### **Ir(II)**

|    |            |             |             |
|----|------------|-------------|-------------|
| Ir | 0.00101400 | -0.00199400 | -0.05256600 |
| C  | 0.90588800 | -2.79943600 | 0.60528300  |
| C  | 1.62184400 | -2.40456100 | -0.59893100 |
| C  | 1.35440500 | -1.08831000 | -1.10148200 |
| C  | 1.05813400 | -4.01846900 | 1.29625500  |
| N  | 0.01702100 | -1.85826500 | 1.08871600  |

---

|   |             |             |             |
|---|-------------|-------------|-------------|
| C | 2.53485200  | -3.25845100 | -1.25638800 |
| C | 2.06002700  | -0.70328800 | -2.25761600 |
| C | 3.20345600  | -2.83954300 | -2.39893900 |
| C | -2.83557700 | -1.76744500 | -2.90433800 |
| C | -2.89251600 | -0.19151700 | -0.59389100 |
| C | -1.64570100 | -1.41824500 | -2.26076100 |
| C | -1.62125200 | -0.62115600 | -1.10013900 |
| N | 1.59754500  | 0.93845800  | 1.09339900  |
| C | 1.97088800  | 2.17916400  | 0.61318300  |
| C | -0.41668300 | 2.13906600  | -2.25335500 |
| C | 0.26844100  | 1.71671600  | -1.09808500 |
| C | 1.27531500  | 2.60395100  | -0.59256000 |
| C | -4.09055900 | -0.54287100 | -1.25438200 |
| C | -4.06681600 | -1.32340200 | -2.40256500 |
| C | -0.13252000 | 3.34880600  | -2.89201400 |
| C | 1.56122900  | 3.82221700  | -1.24759900 |
| C | 0.86581800  | 4.19511600  | -2.39015100 |
| C | 2.96635100  | -1.55147300 | -2.89861300 |
| C | 0.31184600  | -4.29163700 | 2.43069400  |
| C | -0.71142900 | -2.13706200 | 2.18412800  |
| C | -2.87193200 | 0.61432000  | 0.61808500  |
| C | 2.19716200  | 0.44635800  | 2.19204100  |
| C | 2.94747000  | 2.91976600  | 1.30936000  |
| C | -0.61051900 | -3.32635900 | 2.88900300  |
| C | -4.00101000 | 1.08449600  | 1.31879000  |
| N | -1.61056700 | 0.90775000  | 1.09939200  |
| C | 3.17246300  | 1.12805500  | 2.90291200  |
| C | 3.55050200  | 2.40959200  | 2.44710600  |
| C | -3.85930200 | 1.85492400  | 2.46106700  |

---

|   |             |             |             |
|---|-------------|-------------|-------------|
| C | -1.48264000 | 1.66685300  | 2.20199800  |
| C | -2.56006800 | 2.16657900  | 2.91675200  |
| H | 1.77174800  | -4.74983800 | 0.92999000  |
| H | 2.71715400  | -4.26250100 | -0.87772000 |
| H | 1.88555000  | 0.28638100  | -2.66988500 |
| H | 3.90348700  | -3.50733800 | -2.89795400 |
| H | -2.80542600 | -2.38525100 | -3.80102800 |
| H | -0.70388900 | -1.76696100 | -2.67483800 |
| H | -1.18874500 | 1.49646600  | -2.66651300 |
| H | -5.04905900 | -0.19427700 | -0.87407400 |
| H | -4.99671800 | -1.58559200 | -2.90411600 |
| H | -0.68816000 | 3.63400100  | -3.78452400 |
| H | 2.34018700  | 4.48022400  | -0.86668800 |
| H | 1.09632600  | 5.13579600  | -2.88716100 |
| H | 3.48875300  | -1.21076300 | -3.79172500 |
| H | 0.43646000  | -5.23545000 | 2.95624000  |
| H | -1.40036500 | -1.35644700 | 2.49258600  |
| H | 1.86426000  | -0.54087500 | 2.49820700  |
| H | 3.22553900  | 3.90365800  | 0.94485200  |
| H | -1.23277600 | -3.49690700 | 3.76201200  |
| H | -4.99252300 | 0.83489700  | 0.95430400  |
| H | 3.62617100  | 0.67404900  | 3.77841200  |
| H | 4.30270600  | 2.98895900  | 2.97722800  |
| H | -4.73653500 | 2.21286800  | 2.99478300  |
| H | -0.46071400 | 1.87037500  | 2.50799000  |
| H | -2.39301800 | 2.78155200  | 3.79559900  |

**TS1**

---

|   |             |             |             |
|---|-------------|-------------|-------------|
| C | -2.49747900 | -1.78458200 | 1.01321500  |
| C | -2.58036000 | -1.72627100 | -0.38525400 |
| C | -3.78046600 | -1.89586100 | -1.05481400 |
| C | -4.92188100 | -2.13477600 | -0.26808400 |
| C | -4.84098700 | -2.19256000 | 1.12773700  |
| C | -3.61709200 | -2.01493200 | 1.79704100  |
| H | -3.83154800 | -1.84514700 | -2.13822300 |
| H | -5.88264300 | -2.27339200 | -0.75641100 |
| H | -5.74044200 | -2.37608200 | 1.70926800  |
| H | -3.54371200 | -2.05573600 | 2.87946900  |
| C | 2.17599100  | 0.99586500  | 1.26777600  |
| C | 2.35255500  | 1.01567200  | -0.12415900 |
| C | 3.25899300  | 1.00170300  | 2.13652100  |
| C | 3.61440100  | 1.05807700  | -0.69967000 |
| C | 4.54220300  | 1.04024800  | 1.56311900  |
| H | 3.11230700  | 0.98925000  | 3.21228200  |
| C | 4.71804100  | 1.07200200  | 0.17336300  |
| H | 3.73769100  | 1.10165200  | -1.77832400 |
| H | 5.41314100  | 1.05912800  | 2.21307800  |
| H | 5.72246900  | 1.12406800  | -0.23911600 |
| B | -0.48247000 | -1.31347500 | 0.22270400  |
| B | 0.14814800  | 0.95809700  | 0.31061700  |
| O | 0.84856400  | 0.99194100  | 1.56284300  |
| O | 1.13317700  | 1.00146000  | -0.74070900 |
| O | -1.33178700 | -1.48825000 | -0.91356300 |
| O | -1.20266600 | -1.58436200 | 1.41777400  |
| C | -1.27695500 | 1.65084900  | 0.14746900  |
| H | -2.02745800 | 1.07995300  | 0.71005100  |
| C | -1.76284000 | 1.75743800  | -1.33286200 |

---

|   |             |             |             |
|---|-------------|-------------|-------------|
| H | -1.29639900 | 0.98261800  | -1.94979800 |
| H | -2.84483300 | 1.56837900  | -1.37857300 |
| C | -1.22521100 | 3.06250700  | 0.82047500  |
| H | -1.25455500 | 2.94407900  | 1.90963800  |
| H | -0.27454700 | 3.56864600  | 0.59635900  |
| C | -2.38359400 | 3.94256200  | 0.33061200  |
| H | -3.32891300 | 3.41444900  | 0.52071300  |
| H | -2.43144100 | 4.87470700  | 0.90923600  |
| C | -1.48141700 | 3.14326700  | -1.93319600 |
| H | -1.74988100 | 3.15715200  | -2.99797400 |
| H | -0.40105900 | 3.33560200  | -1.88947000 |
| C | -2.24669700 | 4.25594700  | -1.18035300 |
| H | -3.24568500 | 4.38444700  | -1.61914800 |
| H | -1.72552200 | 5.21318700  | -1.31832800 |
| O | 0.84553500  | -1.84230400 | 0.13334000  |
| C | 1.44754100  | -2.10047300 | -0.98744800 |
| H | 0.91750400  | -1.99083400 | -1.92794000 |
| N | 2.74353800  | -2.42653200 | -1.00278500 |
| C | 3.45170200  | -2.57008200 | -2.26708900 |
| H | 3.86288000  | -3.58285900 | -2.35752100 |
| H | 2.76898000  | -2.38894100 | -3.10033500 |
| H | 4.27486900  | -1.84780400 | -2.32193900 |
| C | 3.51428500  | -2.62282000 | 0.22237400  |
| H | 4.20506000  | -1.78520600 | 0.37454900  |
| H | 2.83780600  | -2.68451600 | 1.07429400  |
| H | 4.08579700  | -3.55474300 | 0.13893200  |

**B<sub>2</sub>pin<sub>2</sub>**

---

|   |             |             |             |
|---|-------------|-------------|-------------|
| B | 0.85207300  | -0.00000800 | -0.00021100 |
| B | -0.85205500 | 0.00006500  | -0.00024100 |
| O | -1.61787000 | -1.00570600 | -0.54397400 |
| O | -1.61776800 | 1.00581700  | 0.54362400  |
| O | 1.61774400  | -0.54496600 | 1.00501400  |
| O | 1.61793500  | 0.54503100  | -1.00522600 |
| C | 3.01113400  | 0.55154300  | -0.56389600 |
| C | 3.29709500  | 1.96643900  | -0.04169400 |
| H | 4.34368800  | 2.07949500  | 0.26272400  |
| H | 3.09131300  | 2.68669900  | -0.84024900 |
| H | 2.65711200  | 2.21762400  | 0.81029700  |
| C | 3.89983800  | 0.25006700  | -1.76946100 |
| H | 3.80311900  | 1.05521700  | -2.50551200 |
| H | 4.95348100  | 0.18791800  | -1.47114400 |
| H | 3.61912000  | -0.68649200 | -2.25719800 |
| C | 3.01101600  | -0.55156800 | 0.56393100  |
| C | 3.29698300  | -1.96645600 | 0.04172000  |
| H | 4.34358800  | -2.07953900 | -0.26267500 |
| H | 3.09118500  | -2.68671900 | 0.84026300  |
| H | 2.65701500  | -2.21762200 | -0.81028400 |
| C | 3.89951600  | -0.25017300 | 1.76967900  |
| H | 3.61881600  | 0.68643500  | 2.25732600  |
| H | 3.80253000  | -1.05527900 | 2.50574500  |
| H | 4.95323700  | -0.18817700 | 1.47159400  |
| C | -3.01099700 | 0.56456300  | 0.55094500  |
| C | -3.89968200 | 1.76983300  | 0.24824600  |
| H | -4.95329600 | 1.47138800  | 0.18626800  |
| H | -3.80309300 | 2.50667900  | 1.05268100  |
| H | -3.61888700 | 2.25670400  | -0.68874400 |

---

|   |             |             |             |
|---|-------------|-------------|-------------|
| C | -3.29679700 | 0.04385200  | 1.96647300  |
| H | -2.65686000 | -0.80795300 | 2.21837800  |
| H | -3.09082700 | 0.84307700  | 2.68592200  |
| H | -4.34340200 | -0.26037200 | 2.08002700  |
| C | -3.01114600 | -0.56448600 | -0.55090100 |
| C | -3.29736300 | -0.04391600 | -1.96640900 |
| H | -4.34402800 | 0.26024800  | -2.07973500 |
| H | -2.65752600 | 0.80788900  | -2.21853800 |
| H | -3.09152100 | -0.84318800 | -2.68584000 |
| C | -3.89964100 | -1.76983800 | -0.24790000 |
| H | -4.95326100 | -1.47155900 | -0.18546900 |
| H | -3.80328300 | -2.50660900 | -1.05244300 |
| H | -3.61838100 | -2.25671900 | 0.68895800  |

**cyclohexyl B<sub>2</sub>pin<sub>2</sub> radical**

|   |             |             |             |
|---|-------------|-------------|-------------|
| B | -1.06518500 | 0.10799000  | 0.08598100  |
| B | 0.77673700  | -0.08372300 | 0.25392600  |
| O | 0.94483500  | -1.08387200 | 1.25847500  |
| O | 1.33522500  | -0.55515800 | -0.96182500 |
| O | -1.82910700 | 0.77865900  | 0.99633700  |
| O | -1.78053900 | -0.46916400 | -0.92447300 |
| C | 1.11844800  | 1.50551200  | 0.69300000  |
| H | 0.49063400  | 1.72899200  | 1.56231500  |
| C | 0.80470000  | 2.52204400  | -0.42795500 |
| H | 1.04302900  | 2.09156600  | -1.41031700 |
| H | -0.26994100 | 2.74472600  | -0.43732400 |
| C | 2.61426800  | 1.59759300  | 1.13446600  |
| H | 2.67574600  | 2.28497800  | 1.99302600  |



---

|   |             |             |             |
|---|-------------|-------------|-------------|
| H | 2.97392300  | 0.63220000  | 1.50598300  |
| C | 3.51524500  | 2.12599800  | 0.01066100  |
| H | 4.56922900  | 2.08809900  | 0.31714200  |
| H | 3.42223600  | 1.46306200  | -0.85835200 |
| C | 1.60736000  | 3.82105300  | -0.24276000 |
| H | 1.38836100  | 4.23078500  | 0.75366600  |
| H | 1.27804500  | 4.58029600  | -0.96424900 |
| C | 3.12861000  | 3.56946800  | -0.38821100 |
| H | 3.67871200  | 4.28984300  | 0.23243900  |
| H | 3.44129100  | 3.75481800  | -1.42459300 |
| C | -3.23287400 | 0.46317900  | 0.70732600  |
| C | -3.16755900 | 0.00168600  | -0.80267400 |
| C | -4.06735100 | 1.71483300  | 0.96859200  |
| H | -5.11908600 | 1.54035200  | 0.71113300  |
| H | -4.01713800 | 1.97255900  | 2.03162800  |
| H | -3.70600000 | 2.57253500  | 0.39645900  |
| C | -3.63743700 | -0.65327500 | 1.67800600  |
| H | -3.03549600 | -1.55517900 | 1.52950000  |
| H | -3.47449900 | -0.30713600 | 2.70364900  |
| H | -4.69513600 | -0.91683900 | 1.56671600  |
| C | -3.32721000 | 1.14850500  | -1.80816200 |
| H | -4.35575700 | 1.52597900  | -1.82446700 |
| H | -2.65456200 | 1.98152100  | -1.58132100 |
| H | -3.07938200 | 0.78002300  | -2.80873700 |
| C | -4.09714400 | -1.15224900 | -1.17047900 |
| H | -3.90592800 | -2.04004200 | -0.56304400 |
| H | -5.14653000 | -0.86053100 | -1.04174700 |
| H | -3.94741700 | -1.42226800 | -2.22109400 |
| C | 1.33997700  | -2.32636600 | 0.63457000  |

---

|   |             |             |             |
|---|-------------|-------------|-------------|
| C | 1.92319900  | -1.86075800 | -0.76867700 |
| C | 2.35131800  | -3.01629000 | 1.55606600  |
| H | 1.86558400  | -3.26352900 | 2.50614500  |
| H | 2.71794400  | -3.94835800 | 1.10899600  |
| H | 3.20784300  | -2.37425000 | 1.77518800  |
| C | 0.08563700  | -3.21040100 | 0.52090900  |
| H | -0.67616000 | -2.75357700 | -0.11623600 |
| H | 0.32806100  | -4.19973600 | 0.11620800  |
| H | -0.33980300 | -3.34576800 | 1.52142000  |
| C | 1.52673300  | -2.74605900 | -1.95490800 |
| H | 1.91493000  | -3.76491700 | -1.83388500 |
| H | 0.44236600  | -2.79415000 | -2.07801000 |
| H | 1.95026300  | -2.32911000 | -2.87504400 |
| C | 3.44963000  | -1.67277500 | -0.77066000 |
| H | 3.74774800  | -1.20957900 | -1.71701900 |
| H | 3.78115300  | -1.02009800 | 0.04128300  |
| H | 3.97136100  | -2.63250100 | -0.67977000 |

#### **Ir(IV)**

|    |             |            |             |
|----|-------------|------------|-------------|
| Ir | 0.00000000  | 0.00000000 | 0.06276100  |
| C  | -0.88630200 | 2.80704700 | -0.59098200 |
| C  | 0.00000000  | 2.89838200 | 0.57498100  |
| C  | 0.56518100  | 1.67561500 | 1.05211200  |
| C  | -1.53828000 | 3.89290600 | -1.20189700 |
| N  | -1.06564300 | 1.54736200 | -1.08565500 |
| C  | 0.31567900  | 4.11920700 | 1.19561300  |
| C  | 1.46060600  | 1.74433300 | 2.13752100  |
| C  | 1.18486300  | 4.15162500 | 2.28350600  |

---

|   |             |             |             |
|---|-------------|-------------|-------------|
| C | -3.44181300 | 0.04046700  | 2.75368500  |
| C | -2.51007200 | -1.44919100 | 0.57498100  |
| C | -2.24094000 | 0.39275600  | 2.13752100  |
| C | -1.73371500 | -0.34834700 | 1.05211200  |
| N | 1.87287600  | 0.14919300  | -1.08565500 |
| C | 2.87412500  | -0.63596400 | -0.59098200 |
| C | 0.78033400  | -2.13708900 | 2.13752100  |
| C | 1.16853500  | -1.32726800 | 1.05211200  |
| C | 2.51007200  | -1.44919100 | 0.57498100  |
| C | -3.72517800 | -1.78621700 | 1.19561300  |
| C | -4.18784400 | -1.04969100 | 2.28350600  |
| C | 1.68586100  | -3.00093100 | 2.75368500  |
| C | 3.40949900  | -2.33299000 | 1.19561300  |
| C | 3.00298100  | -3.10193400 | 2.28350600  |
| C | 1.75595200  | 2.96046400  | 2.75368500  |
| C | -2.36807900 | 3.68073300  | -2.29540300 |
| C | -1.87754600 | 1.34416300  | -2.14033700 |
| C | -1.98782300 | -2.17108400 | -0.59098200 |
| C | 2.10285300  | 0.95392100  | -2.14033700 |
| C | 4.14049500  | -0.61426300 | -1.20189700 |
| C | -2.54621100 | 2.37926100  | -2.77940700 |
| C | -2.60221500 | -3.27864300 | -1.20189700 |
| N | -0.80723300 | -1.69655500 | -1.08565500 |
| C | 3.33360600  | 1.01545300  | -2.77940700 |
| C | 4.37164800  | 0.21045000  | -2.29540300 |
| C | -2.00356900 | -3.89118300 | -2.29540300 |
| C | -0.22530600 | -2.29808400 | -2.14033700 |
| C | -0.78739500 | -3.39471400 | -2.77940700 |
| H | -1.39622900 | 4.89587500  | -0.81671900 |

---

|   |             |             |             |
|---|-------------|-------------|-------------|
| H | -0.11029900 | 5.05143200  | 0.83651300  |
| H | 1.90690900  | 0.83399700  | 2.52473200  |
| H | 1.41939300  | 5.09806700  | 2.76189400  |
| H | -3.79930400 | 0.61379700  | 3.60531900  |
| H | -1.67571700 | 1.23443400  | 2.52473200  |
| H | -0.23119200 | -2.06843000 | 2.52473200  |
| H | -4.31951900 | -2.62123800 | 0.83651300  |
| H | -5.12475200 | -1.31980300 | 2.76189400  |
| H | 1.36808800  | -3.59719300 | 3.60531900  |
| H | 4.42981800  | -2.43019500 | 0.83651300  |
| H | 3.70535900  | -3.77826400 | 2.76189400  |
| H | 2.43121600  | 2.98339600  | 3.60531900  |
| H | -2.87519600 | 4.51829600  | -2.76570300 |
| H | -1.98500300 | 0.31525000  | -2.46706800 |
| H | 1.26551600  | 1.56143800  | -2.46706800 |
| H | 4.93806700  | -1.23876800 | -0.81671900 |
| H | -3.19055000 | 2.16943800  | -3.62659400 |
| H | -3.54183800 | -3.65710700 | -0.81671900 |
| H | 3.47406300  | 1.67837900  | -3.62659400 |
| H | 5.35055700  | 0.23084500  | -2.76570300 |
| H | -2.47536100 | -4.74914100 | -2.76570300 |
| H | 0.71948700  | -1.87668800 | -2.46706800 |
| H | -0.28351300 | -3.84781700 | -3.62659400 |

**1a<sup>-</sup>**

|   |             |            |             |
|---|-------------|------------|-------------|
| C | 2.10782600  | 1.08174500 | -1.13272900 |
| C | 1.34871500  | 0.05162800 | -0.52863800 |
| C | -0.14866800 | 0.20364200 | -0.87554600 |

---

|   |             |             |             |
|---|-------------|-------------|-------------|
| H | -0.14775600 | 0.31764800  | -1.97644600 |
| C | -0.59094800 | 1.60090300  | -0.38843900 |
| C | 0.18273800  | 2.61335400  | -0.99246200 |
| N | 1.41565500  | 2.23405900  | -1.47810000 |
| H | 1.92906600  | 2.92997600  | -2.00547200 |
| C | 1.86230200  | -0.89710400 | 0.39607900  |
| C | -1.51855000 | 1.95926500  | 0.63785500  |
| O | 1.26276200  | -1.81833000 | 0.98313300  |
| O | -1.87741600 | 3.10935600  | 0.95964600  |
| O | 3.24331400  | -0.72062100 | 0.66919600  |
| O | -2.02155000 | 0.87402200  | 1.35660000  |
| C | 3.80811000  | -1.65845400 | 1.57541100  |
| H | 3.27810900  | -1.62189800 | 2.53631400  |
| H | 3.69172400  | -2.68011400 | 1.18774300  |
| C | 5.28050000  | -1.30613100 | 1.74945700  |
| H | 5.39418500  | -0.28895700 | 2.14341500  |
| H | 5.75852200  | -2.00422200 | 2.45044600  |
| H | 5.81305500  | -1.36003000 | 0.79208900  |
| C | -2.91234800 | 1.19205400  | 2.42165000  |
| H | -3.81749100 | 1.67264200  | 2.02413200  |
| H | -2.43925200 | 1.91315400  | 3.09976000  |
| C | -3.24791700 | -0.10611500 | 3.14389500  |
| H | -3.92317200 | 0.09461000  | 3.98705000  |
| H | -3.73949300 | -0.81741600 | 2.46984000  |
| H | -2.33873500 | -0.58077800 | 3.52981400  |
| C | -1.08554500 | -1.01081400 | -0.67912300 |
| H | -1.14471400 | -1.25906900 | 0.38297400  |
| C | -2.51384900 | -0.70496000 | -1.22148400 |
| H | -3.08314000 | -0.18007300 | -0.44978200 |

---

|   |             |             |             |
|---|-------------|-------------|-------------|
| H | -2.43729400 | -0.01455400 | -2.07472000 |
| C | -0.55855500 | -2.25146700 | -1.43029800 |
| H | -0.62748900 | -2.06145600 | -2.51450900 |
| H | 0.49405400  | -2.42506500 | -1.20273800 |
| C | -3.28986700 | -1.97221500 | -1.66480700 |
| H | -3.09557800 | -2.18820800 | -2.72674000 |
| H | -4.37278100 | -1.79704900 | -1.58404700 |
| C | -1.37463500 | -3.51222600 | -1.06551200 |
| H | -1.27343100 | -4.25897100 | -1.86830500 |
| H | -0.94910500 | -3.96388700 | -0.16003600 |
| C | -2.87260800 | -3.19386600 | -0.83501700 |
| H | -3.49654400 | -4.06712000 | -1.07694800 |
| H | -3.04726300 | -2.97339800 | 0.22770200  |
| C | -0.13017800 | 4.08131100  | -1.08837800 |
| H | -1.18853200 | 4.25444900  | -1.30369800 |
| H | 0.08219100  | 4.61207200  | -0.14872000 |
| H | 0.47095400  | 4.55127500  | -1.88423400 |
| C | 3.57577600  | 1.10630800  | -1.45618400 |
| H | 4.19592700  | 1.47878200  | -0.62518700 |
| H | 3.94588800  | 0.10564900  | -1.69962300 |
| H | 3.76782600  | 1.75703400  | -2.32635400 |

---

## 4 References

1. X. Wang, R. Liu, Q. Ding, W. Xiao and J. Wu, *Synergistic Photoredox and Tertiary Amine Catalysis: Generation of Allylic Sulfones from Morita–Baylis–Hillman Acetates and Sulfur Dioxide*, *Organic Chemistry Frontiers*, 2021, **8**, 3308-3313.
2. D. B. Dess and J. C. Martin, *Readily Accessible 12-I-5 Oxidant for the Conversion of Primary and Secondary Alcohols to Aldehydes and Ketones*, *The Journal of Organic Chemistry*, 1983, **48**, 4155-4156.
3. Y. Hu, C. F. Zorumski and D. F. Covey, *Neurosteroid Analogs: Structure-Activity Studies of Benz[E]Indene Modulators of Gabaa Receptor Function. 1. The Effect of 6-Methyl Substitution on the Electrophysiological Activity of 7-Substituted Benz[E]Indene-3-Carbonitriles*, *Journal of Medicinal Chemistry*, 1993, **36**, 3956-3967.
4. S. Liang, T. Kumon, R. A. Angnes, M. Sanchez, B. Xu and G. B. Hammond, *Synthesis of Alkyl Halides from Aldehydes Via Deformylative Halogenation*, *Organic Letters*, 2019, **21**, 3848-3854.
5. Á. Gutiérrez-Bonet, C. Remeur, J. K. Matsui and G. A. Molander, *Late-Stage C–H Alkylation of Heterocycles and 1,4-Quinones Via Oxidative Homolysis of 1,4-Dihydropyridines*, *Journal of the American Chemical Society*, 2017, **139**, 12251-12258.
6. L. Li, S.-q. Zhang, Y. Chen, X. Cui, G. Zhao, Z. Tang and G.-x. Li, *Photoredox Alkylation of Sulfinylamine Enables the Synthesis of Highly Functionalized Sulfinamides and S(VI) Derivatives*, *ACS Catalysis*, 2022, **12**, 15334-15340.
7. B. Chen, C. S. Kuai, J. X. Xu and X. F. Wu, *Manganese(III) - Promoted Double Carbonylation of Anilines toward  $\alpha$  - Ketoamides Synthesis*, *Advanced Synthesis and Catalysis*, 2022, **364**, 487-492.
8. M. L. Shegavi, A. Agarwal and S. K. Bose, *Efficient Synthesis of Alkylboronic Esters Via Magnetically Recoverable Copper Nanoparticle-Catalyzed Borylation of Alkyl Chlorides and Bromides*, *Green Chemistry*, 2020, **22**, 2799-2803.
9. C. Shu, A. Noble and V. K. Aggarwal, *Metal-Free Photoinduced C(Sp<sup>3</sup>)-H Borylation of Alkanes*, *Nature*, 2020, **586**, 714-719.
10. J. Wang, M. Shang, H. Lundberg, K. S. Feu, S. J. Hecker, T. Qin, D. G. Blackmond and P. S. Baran, *Cu-Catalyzed Decarboxylative Borylation*, *ACS Catalysis*, 2018, **8**, 9537-9542.
11. A. S. Dudnik and G. C. Fu, *Nickel-Catalyzed Coupling Reactions of Alkyl Electrophiles, Including Unactivated Tertiary Halides, to Generate Carbon–Boron Bonds*, *Journal of the American Chemical Society*, 2012, **134**, 10693-10697.
12. W. Chen, Y. Chen, X. Gu, Z. Chen and C.-Y. Ho, *(Nhc)Pd(II) Hydride-Catalyzed Dehydroaromatization by Olefin Chain-Walking Isomerization and Transfer-Dehydrogenation*, *Nature Communications*, 2022, **13**, 5507.
13. Y. Cheng, C. Mück-Lichtenfeld and A. Studer, *Metal-Free Radical Borylation of Alkyl and Aryl Iodides*, *Angewandte Chemie International Edition*, 2018, **57**, 16832-16836.
14. A. M. Sarotti, P. L. Pisano and S. C. Pellegrinet, *A Facile Microwave-Assisted Diels–Alder Reaction of Vinylboronates*, *Organic & Biomolecular Chemistry*, 2010, **8**, 5069-5073.
15. X. Chen, Z. Cheng and Z. Lu, *Cobalt-Catalyzed Asymmetric Markovnikov Hydroboration of Styrenes*, *ACS Catalysis*, 2019, **9**, 4025-4029.
16. Y. Wen, J. Xie, C. Deng and C. Li, *Selective Synthesis of Alkylboronates by Copper(I)-Catalyzed*

- 
- Borylation of Allyl or Vinyl Arenes, The Journal of Organic Chemistry, 2015, 80, 4142-4147.*
17. P. J. Chirik, T. Diao and R. Yu, *Hydroboration and Borylation with Cobalt Catalysts, Journal, 2018.*
18. A. R. Araujo, D. K. Ohira and P. M. Imamura, *Lda Promoted Coupling Reactions of B-Cyclohexenyl Bromide, Synthetic Communications, 1992, 22, 1409-1416.*
19. F.-T. Xiong, B.-H. He, Y. Liu, Q. Zhou and J.-H. Fan, *Iron-Promoted Oxidative Alkylation/Cyclization of Ynones with 4-Alkyl-1,4-Dihydropyridines: Access to 2-Alkylated Indenones, The Journal of Organic Chemistry, 2022, 87, 8599-8610.*
20. M. J. Frisch, G. W. Trucks, H. B. Schlegel, G. E. Scuseria, M. A. Robb, J. R. Cheeseman, G. Scalmani, V. Barone, G. A. Petersson, H. Nakatsuji, X. Li, M. Caricato, A. V. Marenich, J. Bloino, B. G. Janesko, R. Gomperts, B. Mennucci, H. P. Hratchian, J. V. Ortiz, A. F. Izmaylov, J. L. Sonnenberg, Williams, F. Ding, F. Lipparini, F. Egidi, J. Goings, B. Peng, A. Petrone, T. Henderson, D. Ranasinghe, V. G. Zakrzewski, J. Gao, N. Rega, G. Zheng, W. Liang, M. Hada, M. Ehara, K. Toyota, R. Fukuda, J. Hasegawa, M. Ishida, T. Nakajima, Y. Honda, O. Kitao, H. Nakai, T. Vreven, K. Throssell, J. A. Montgomery Jr., J. E. Peralta, F. Ogliaro, M. J. Bearpark, J. J. Heyd, E. N. Brothers, K. N. Kudin, V. N. Staroverov, T. A. Keith, R. Kobayashi, J. Normand, K. Raghavachari, A. P. Rendell, J. C. Burant, S. S. Iyengar, J. Tomasi, M. Cossi, J. M. Millam, M. Klene, C. Adamo, R. Cammi, J. W. Ochterski, R. L. Martin, K. Morokuma, O. Farkas, J. B. Foresman and D. J. Fox, *Gaussian 09 Rev. D.01, Journal, 2016.*



# <sup>1</sup>H, <sup>13</sup>C and <sup>19</sup>F NMR spectra of the prepared compounds

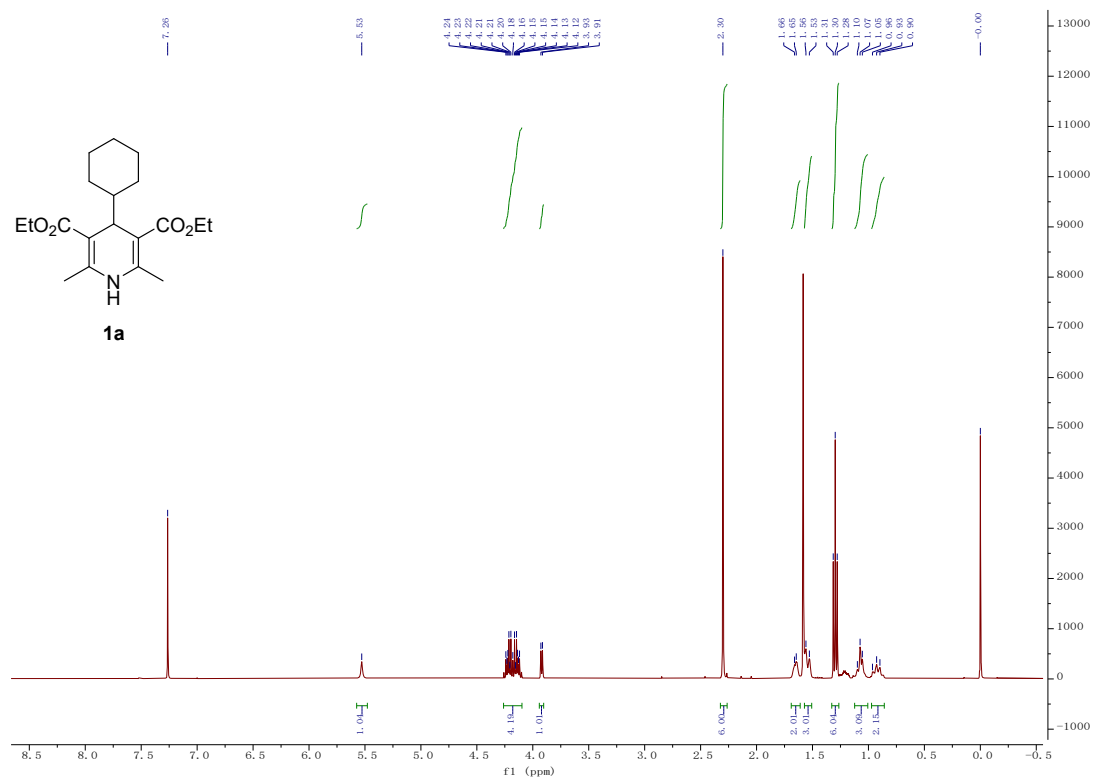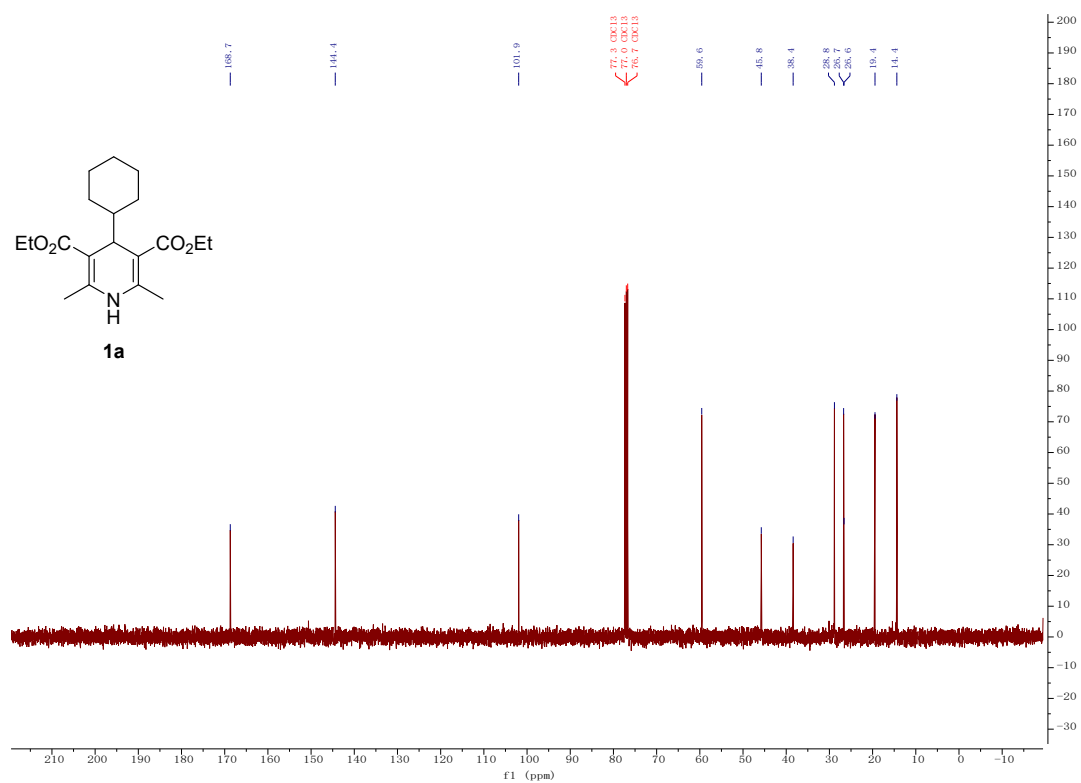

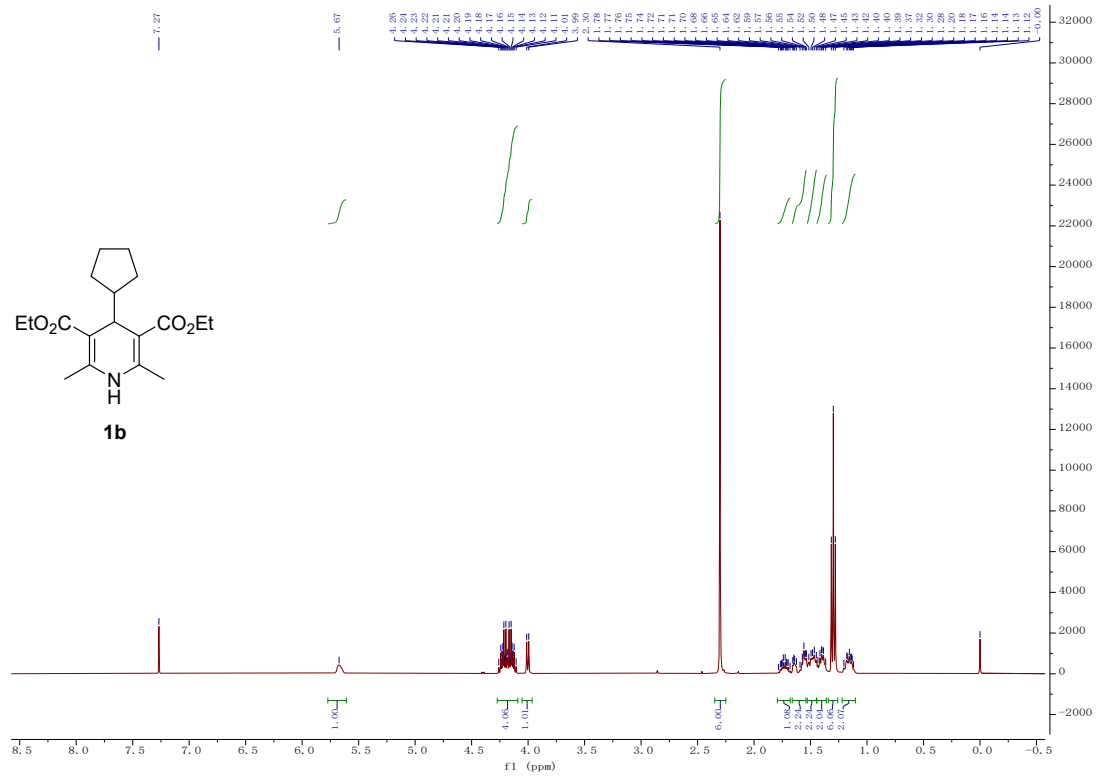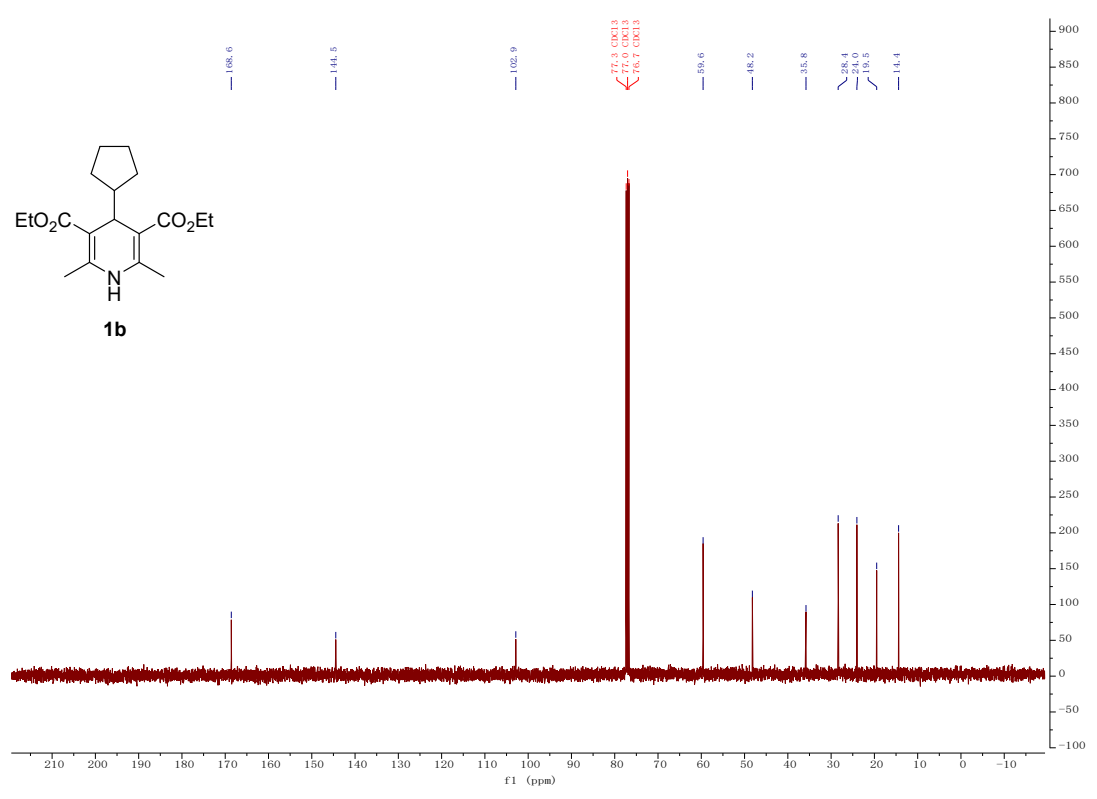

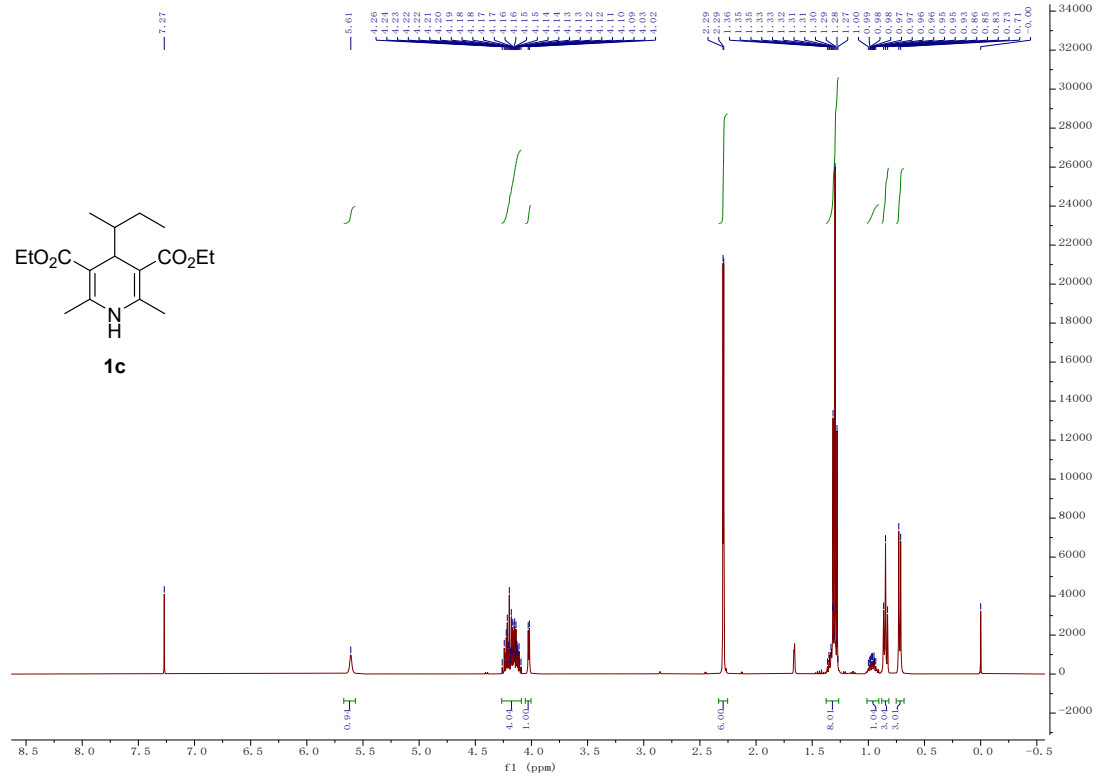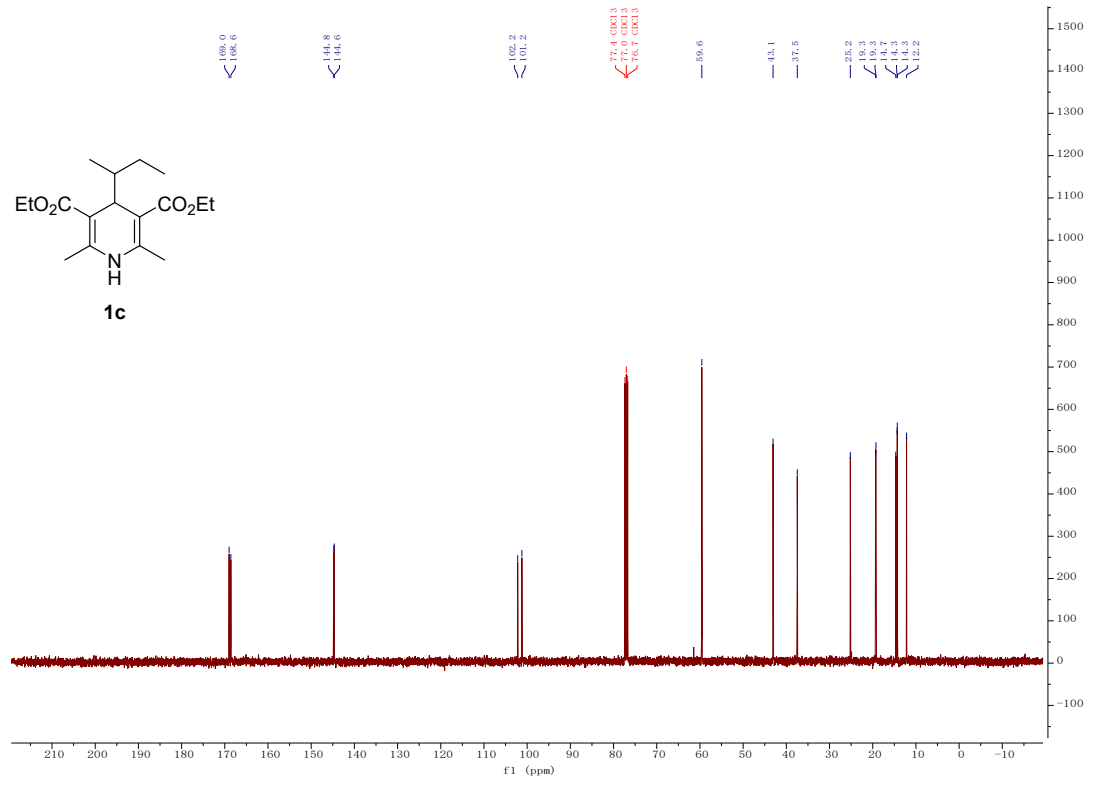

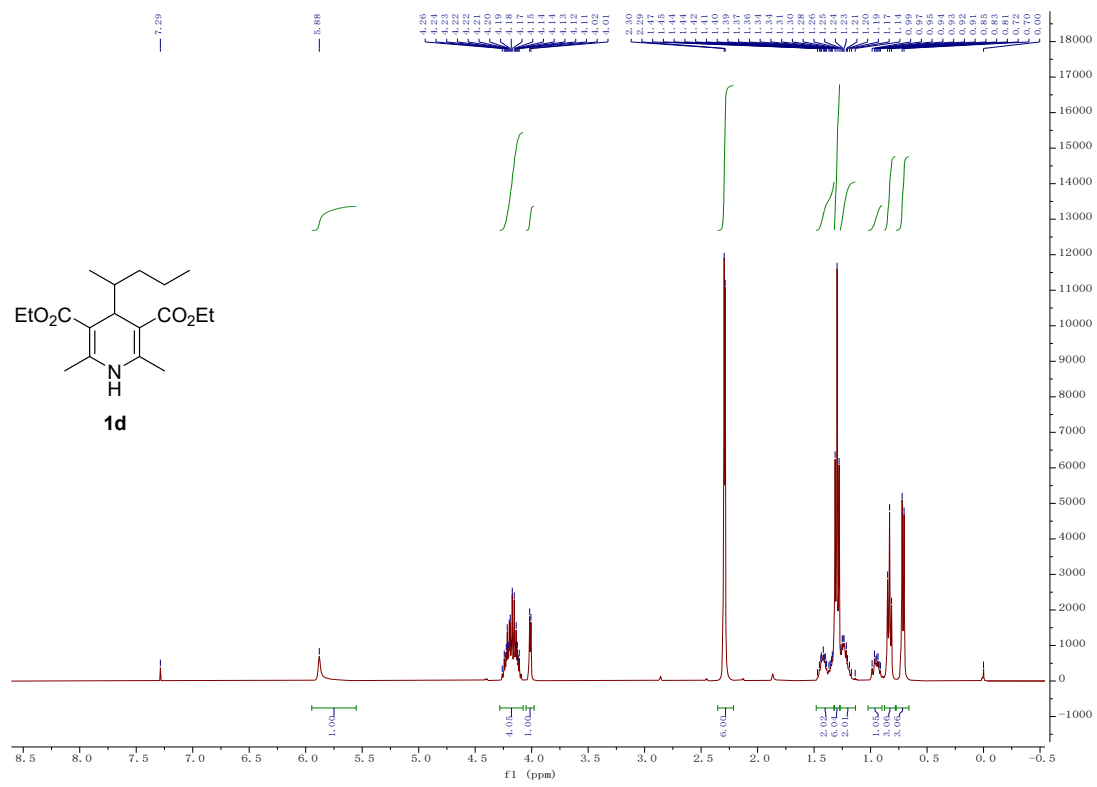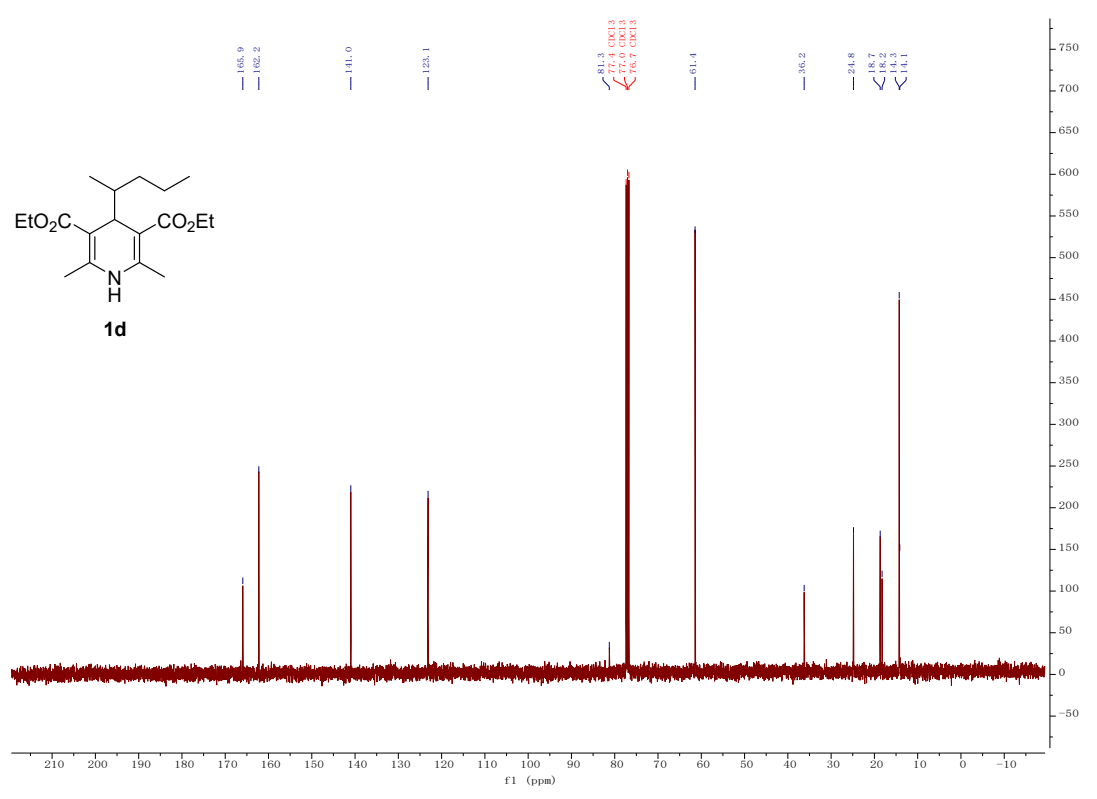

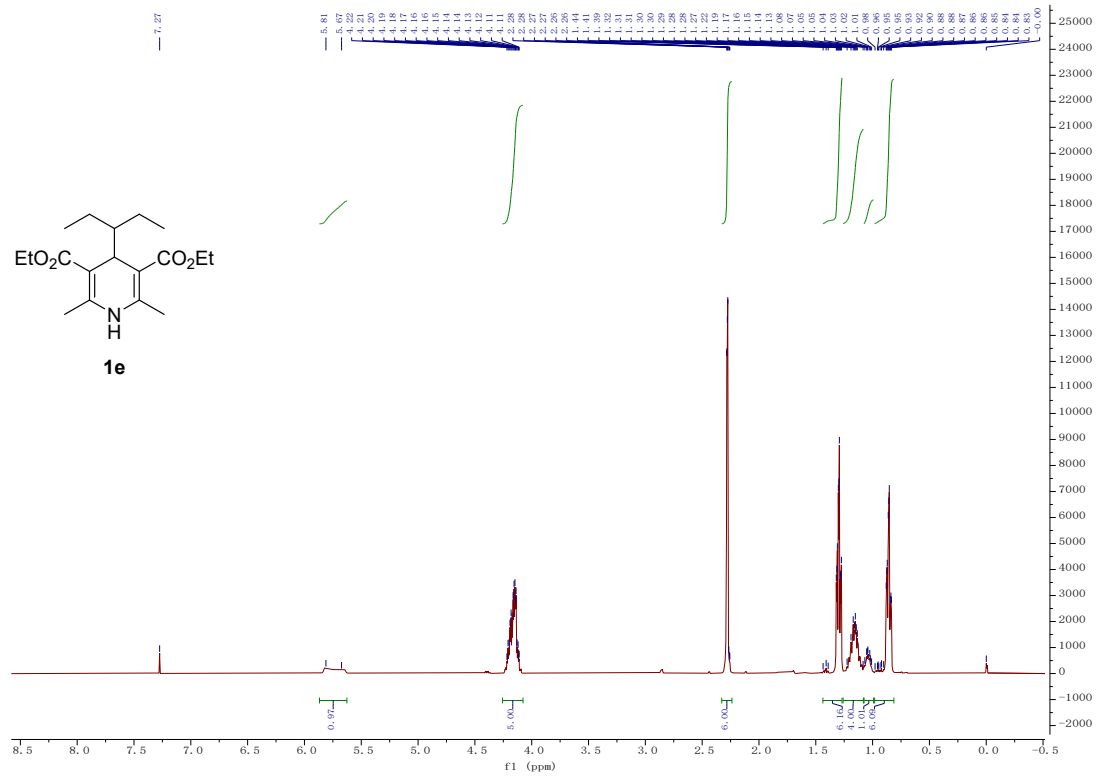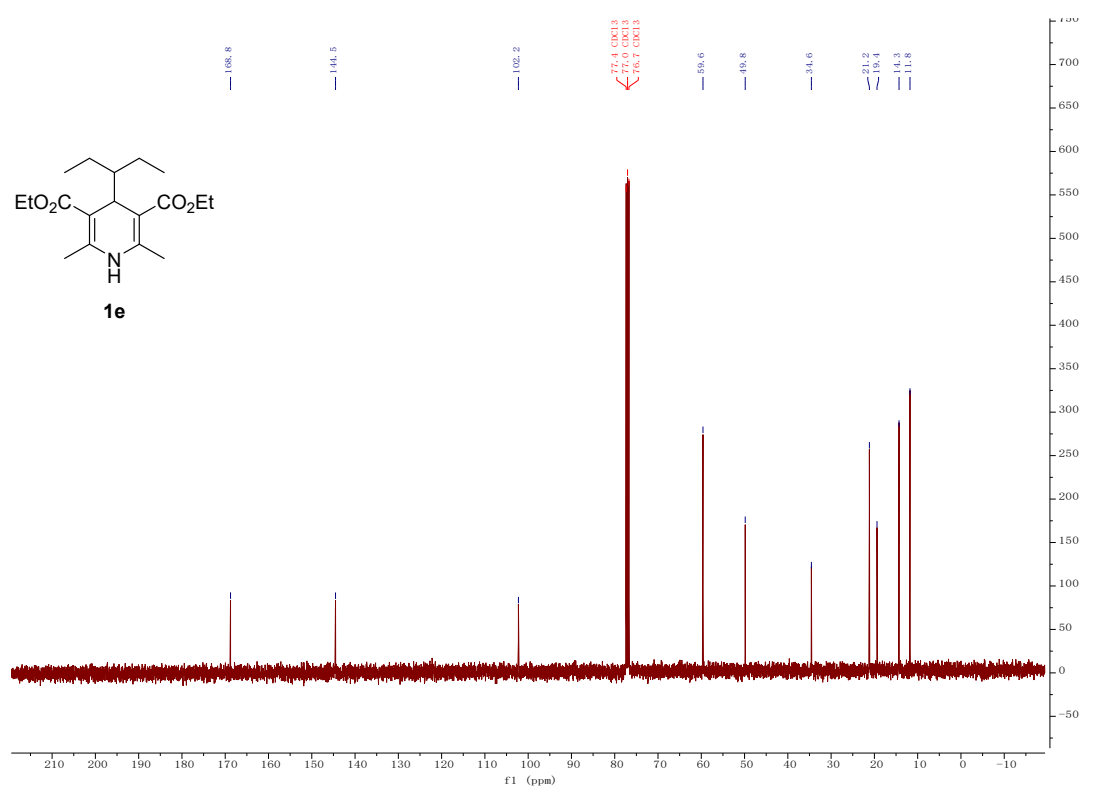

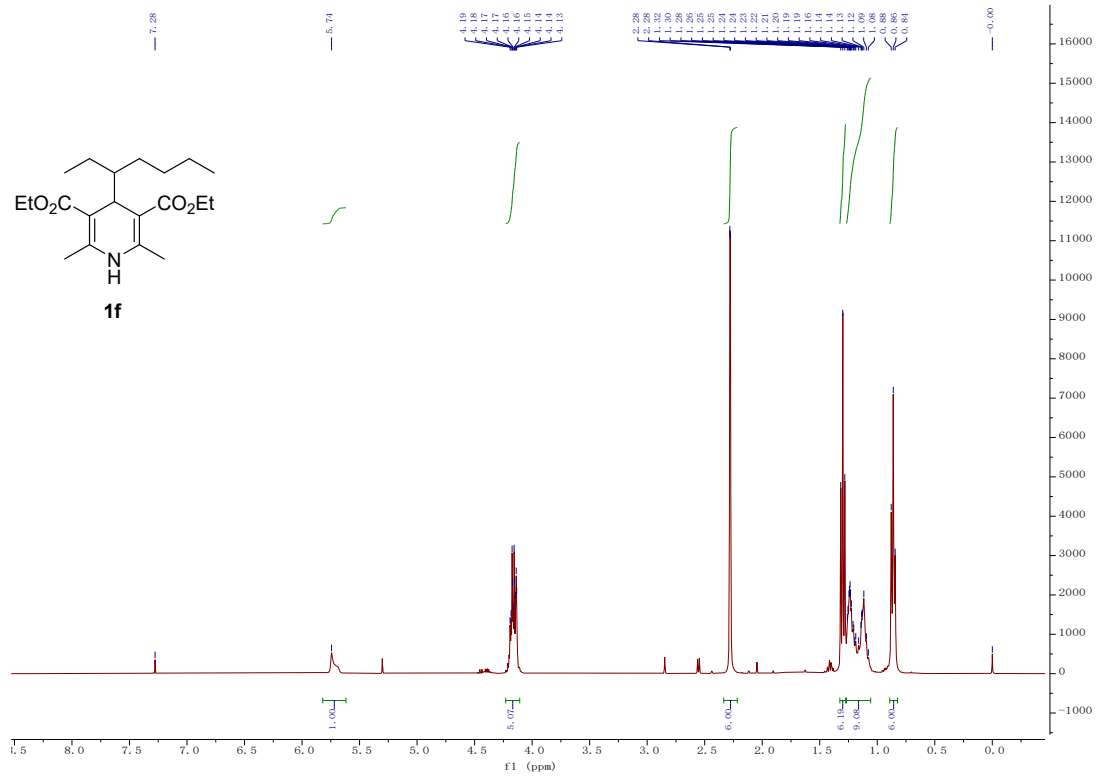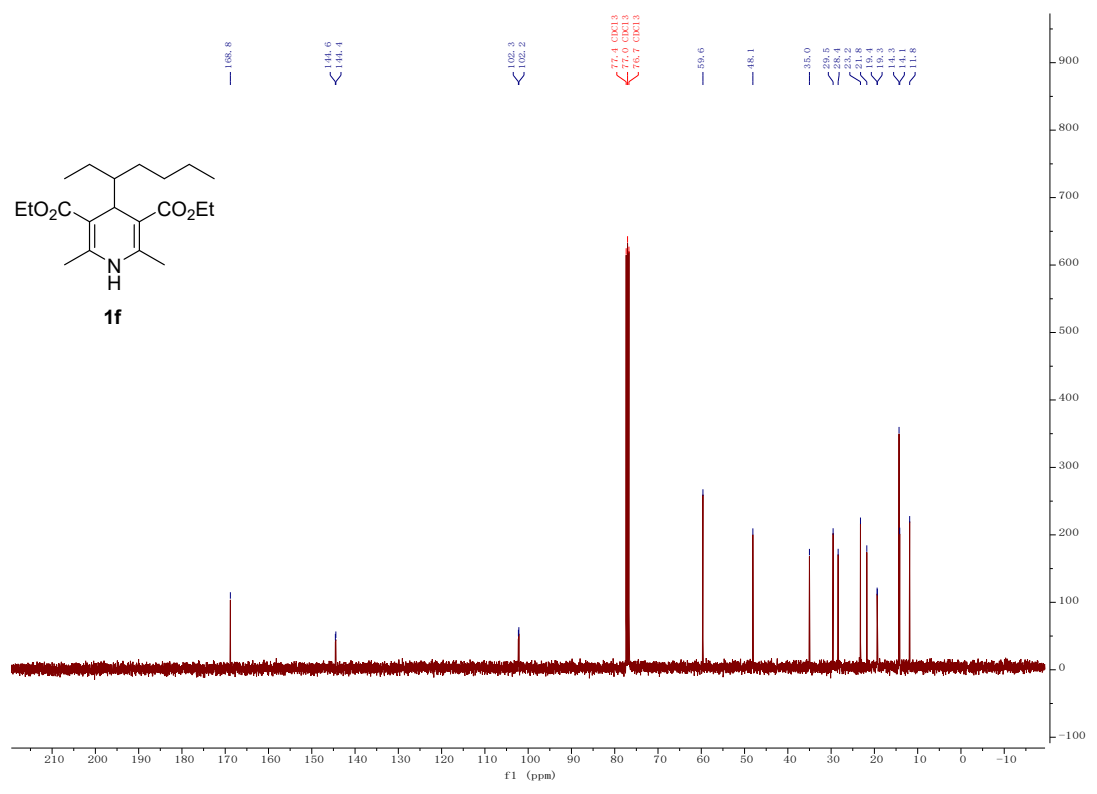

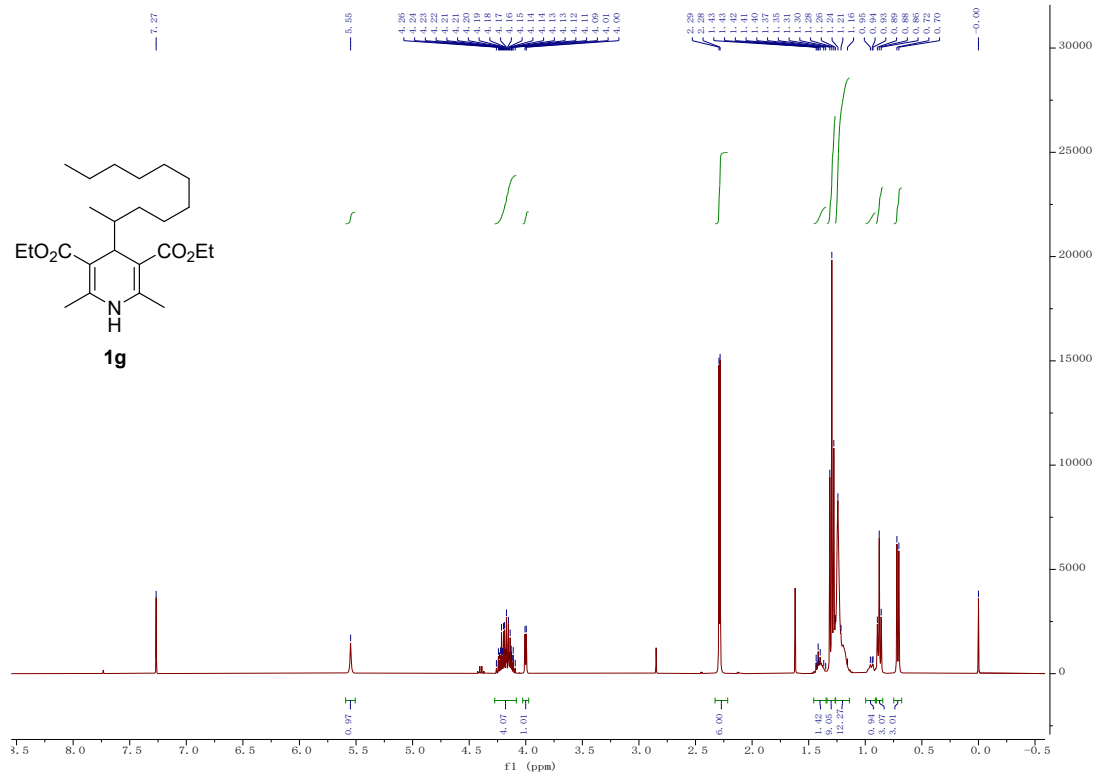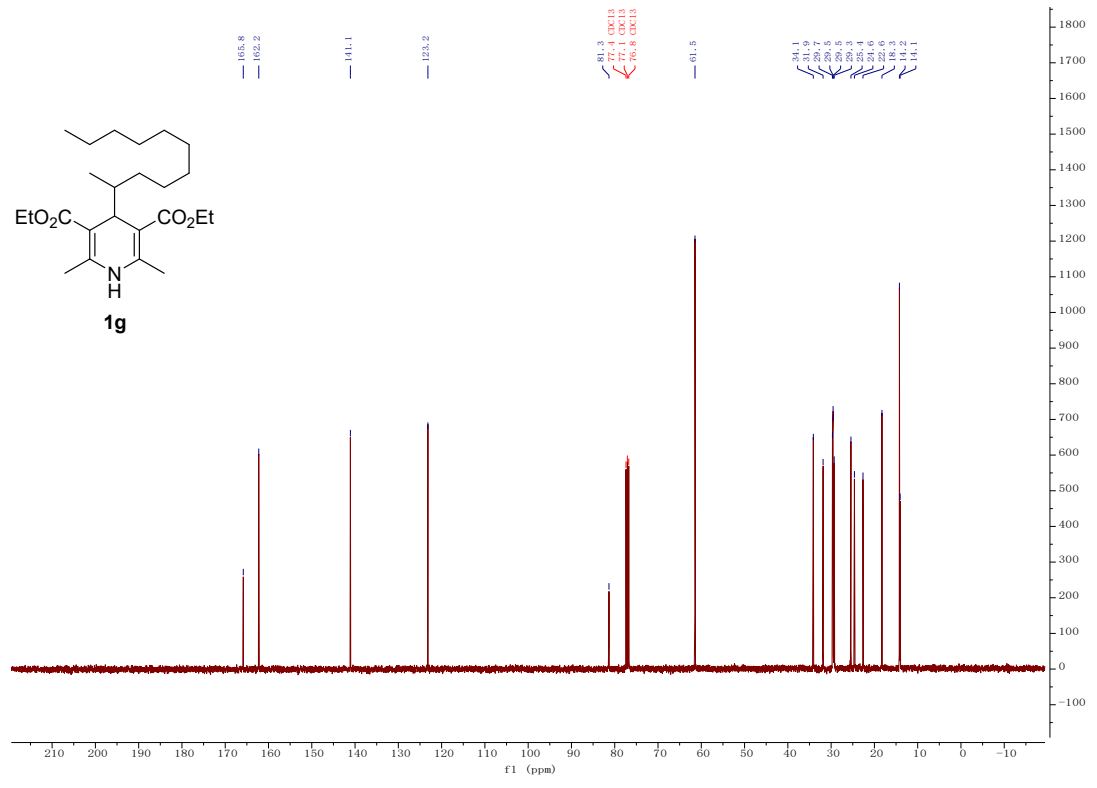

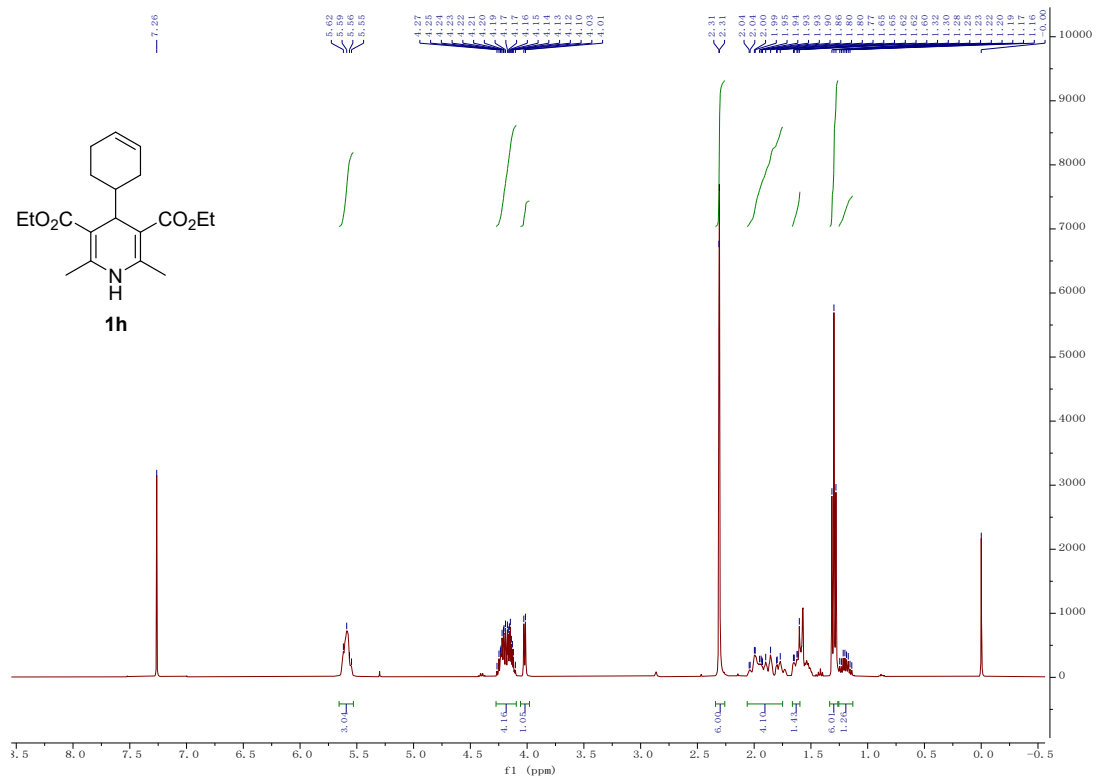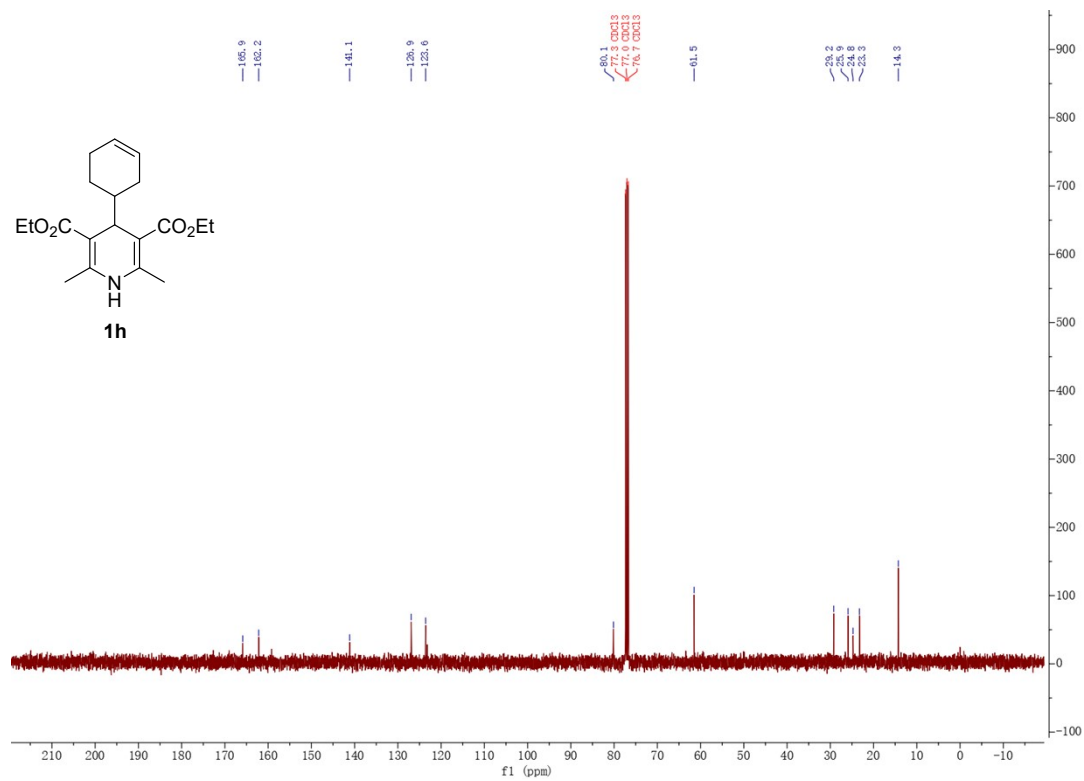



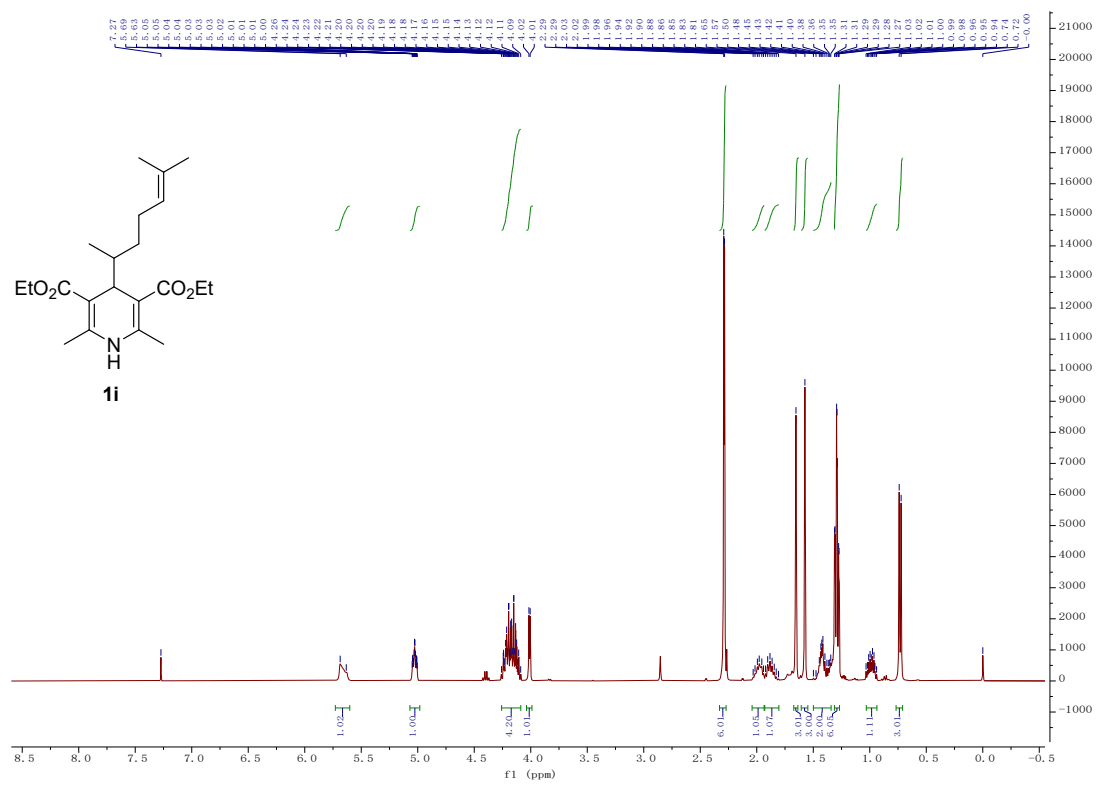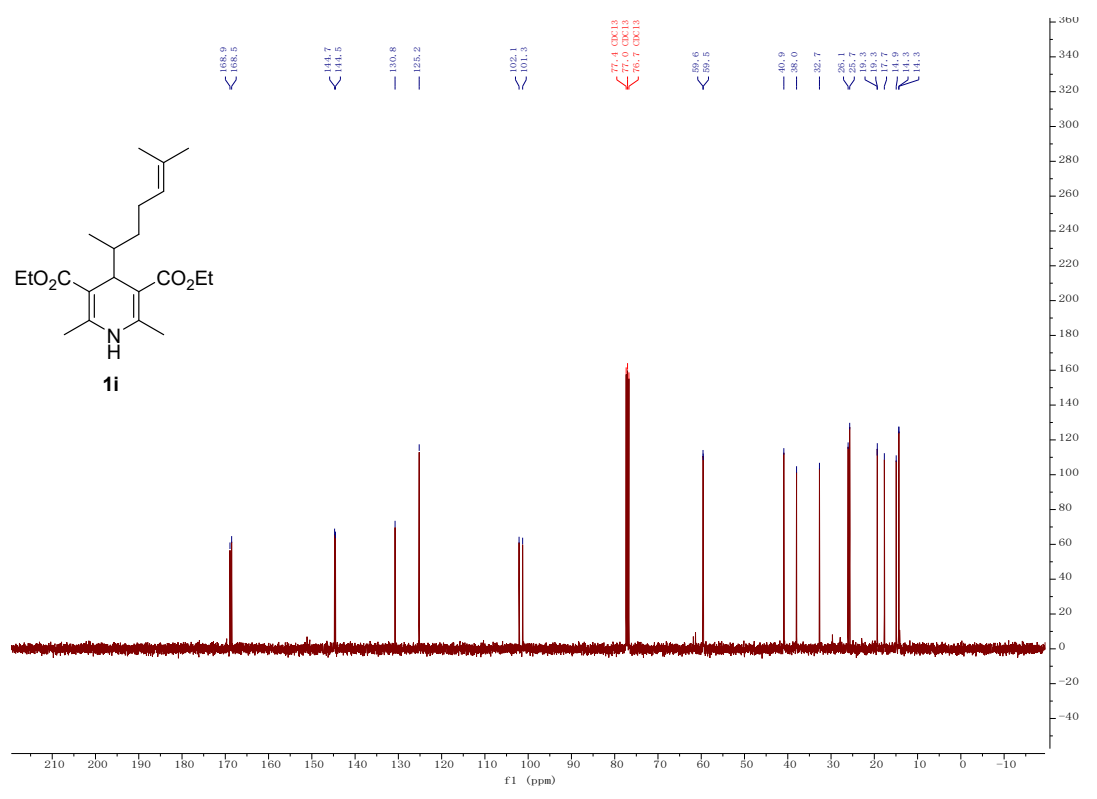

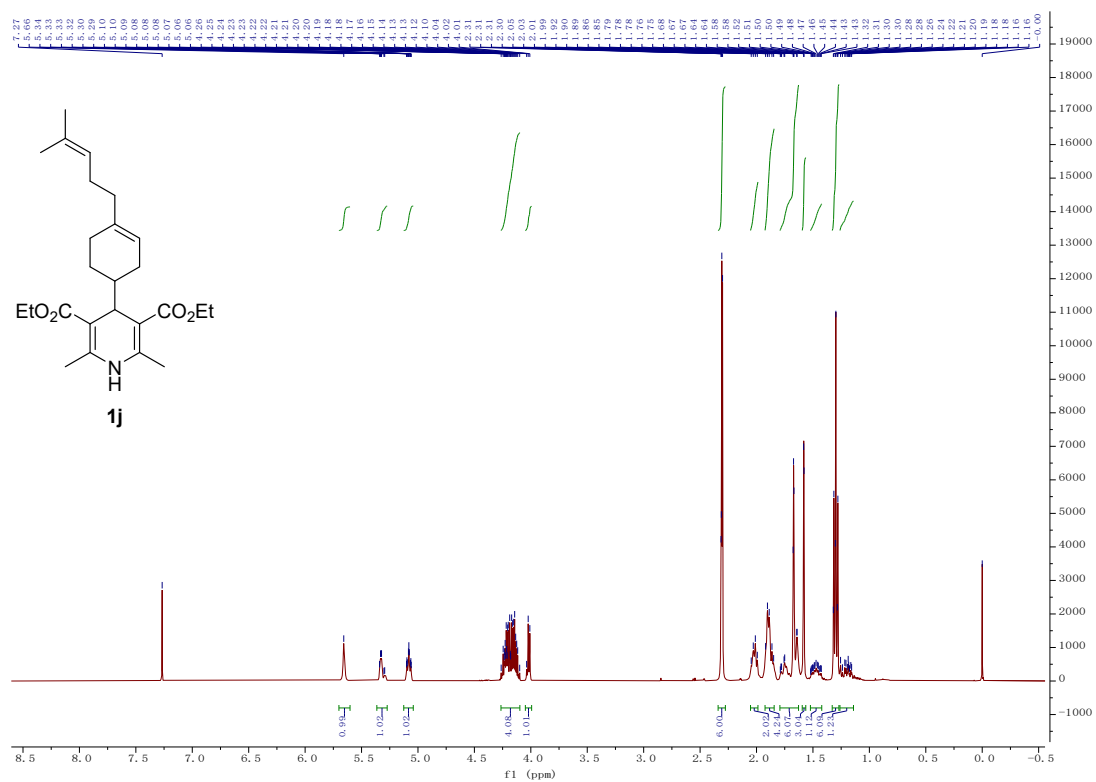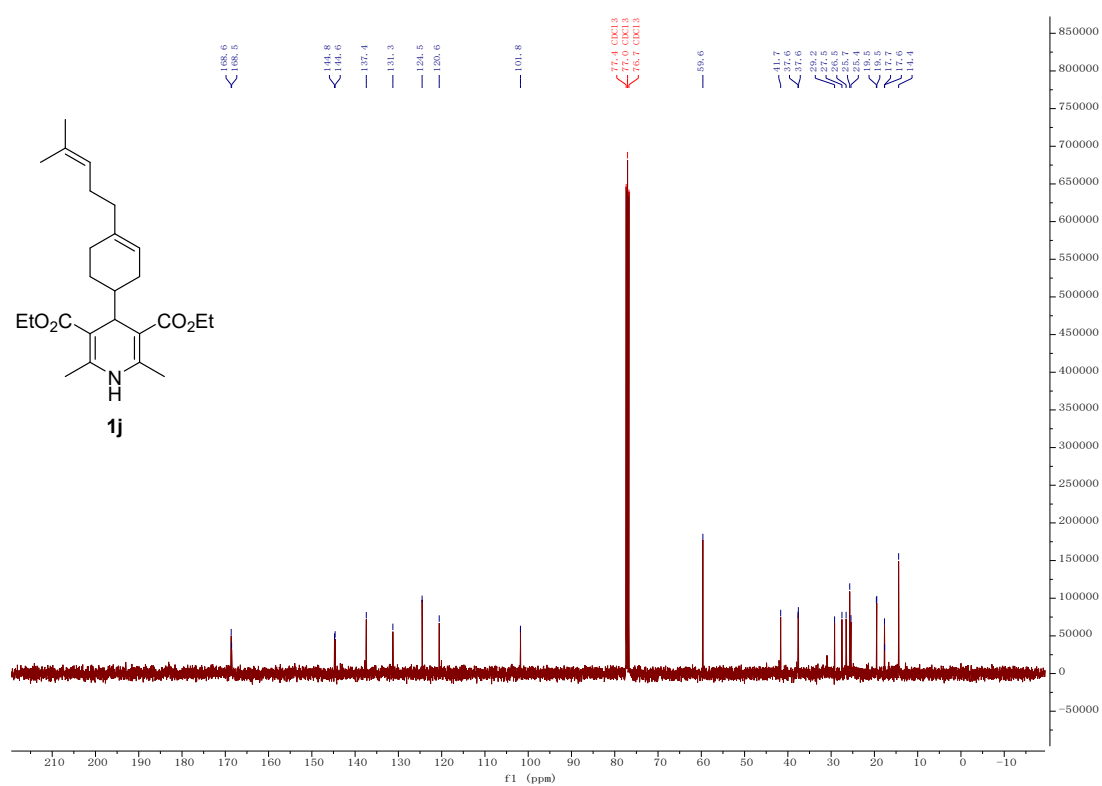

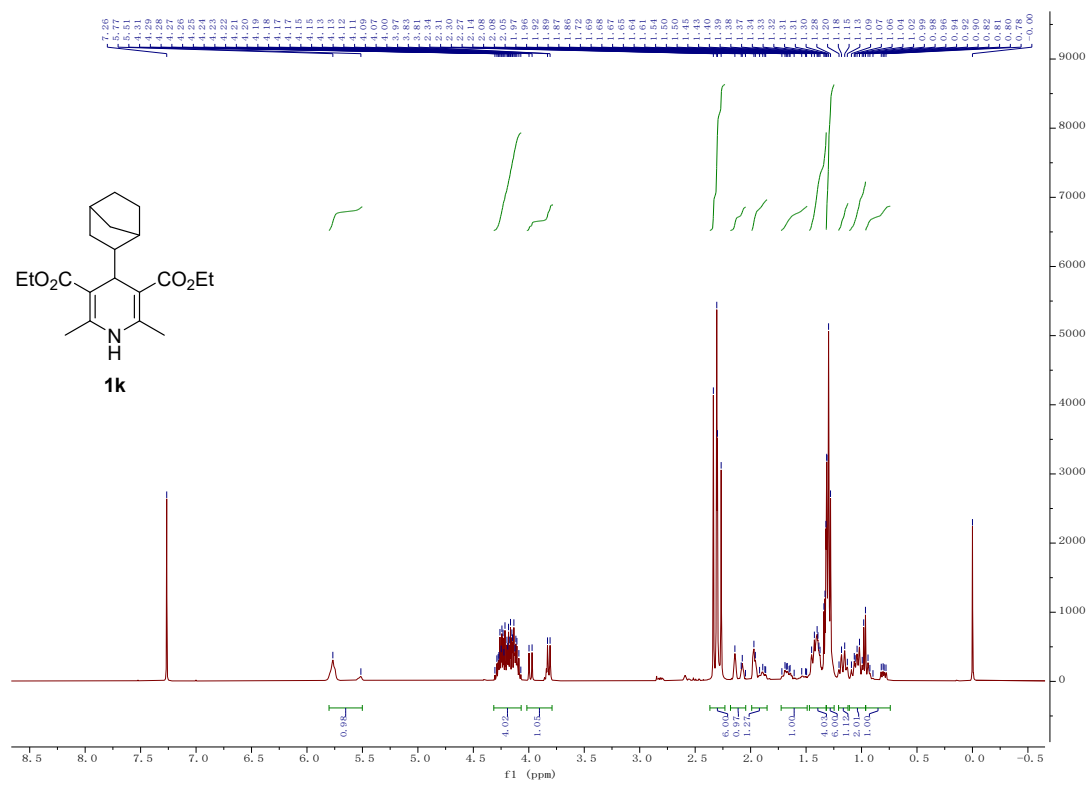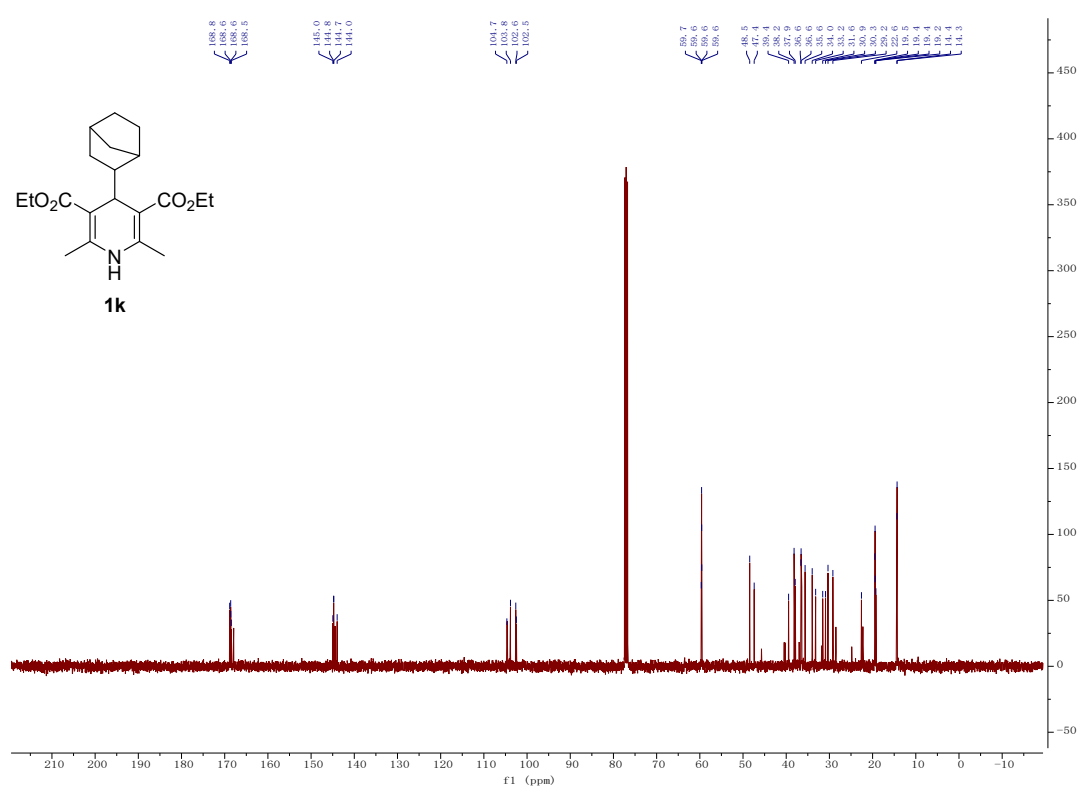

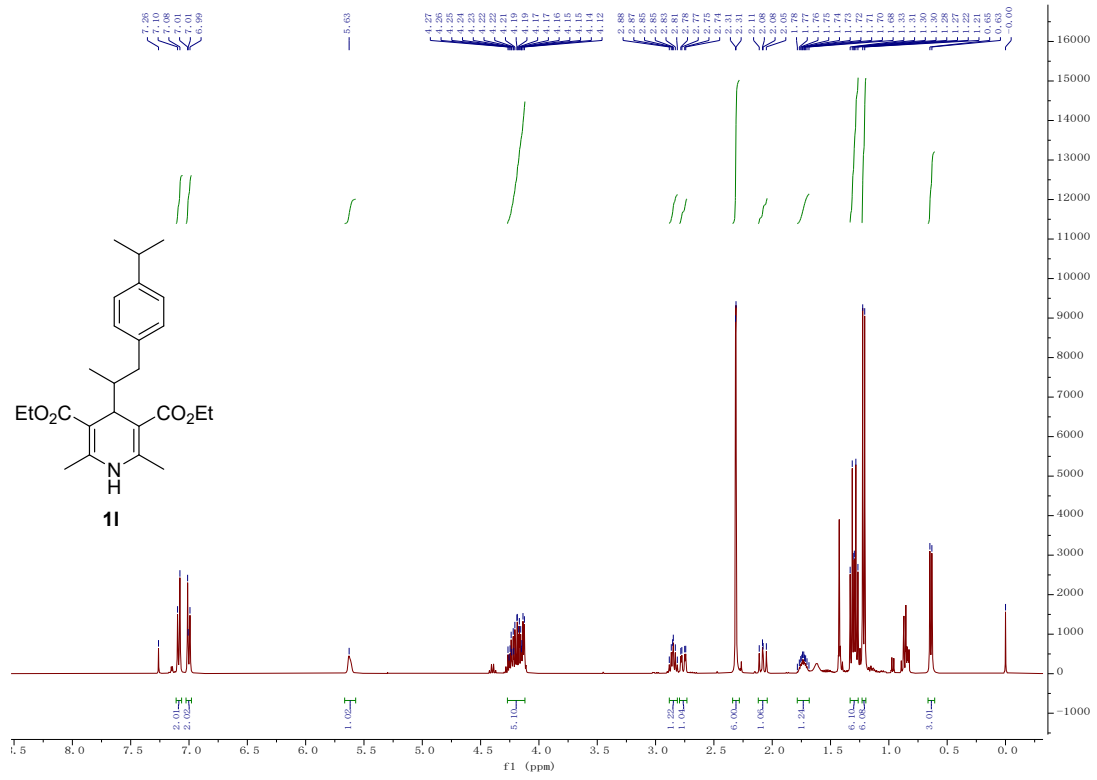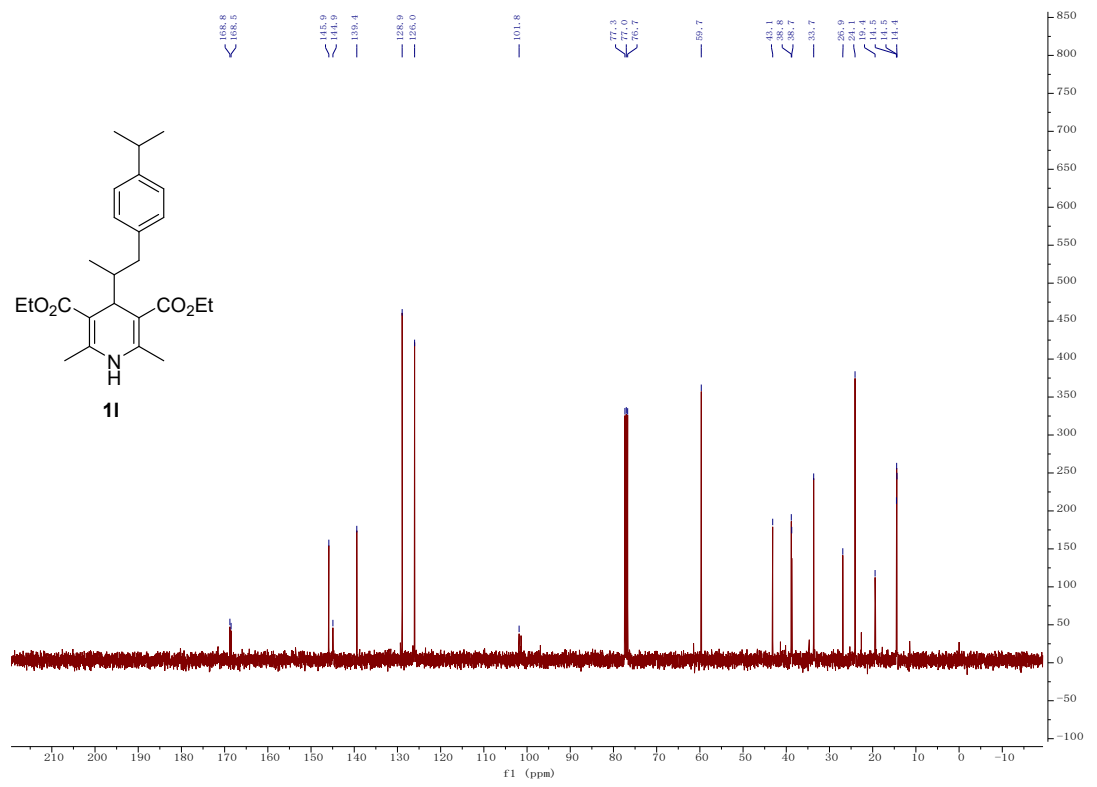

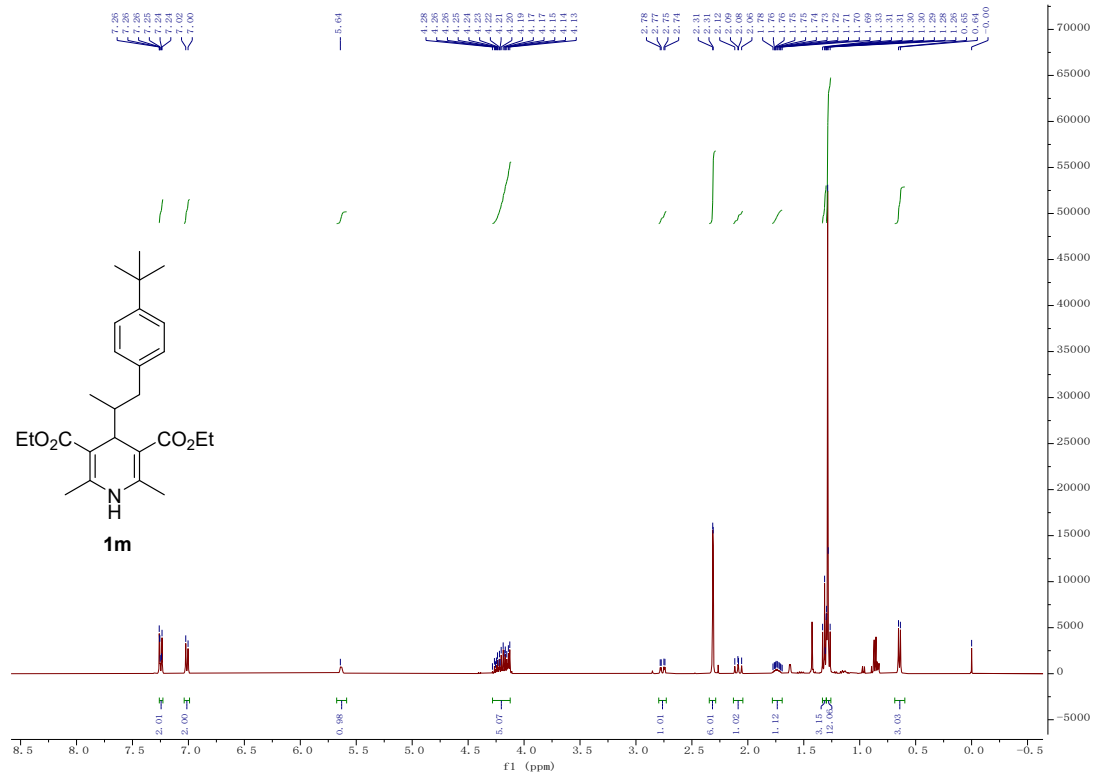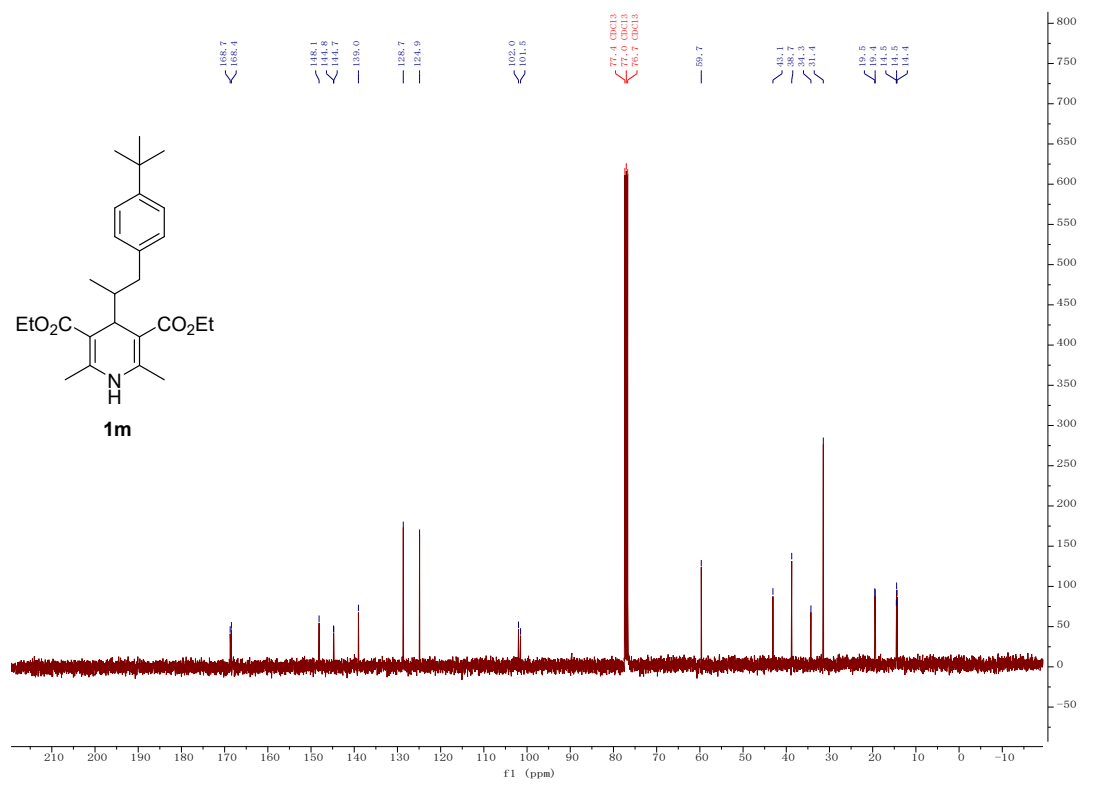

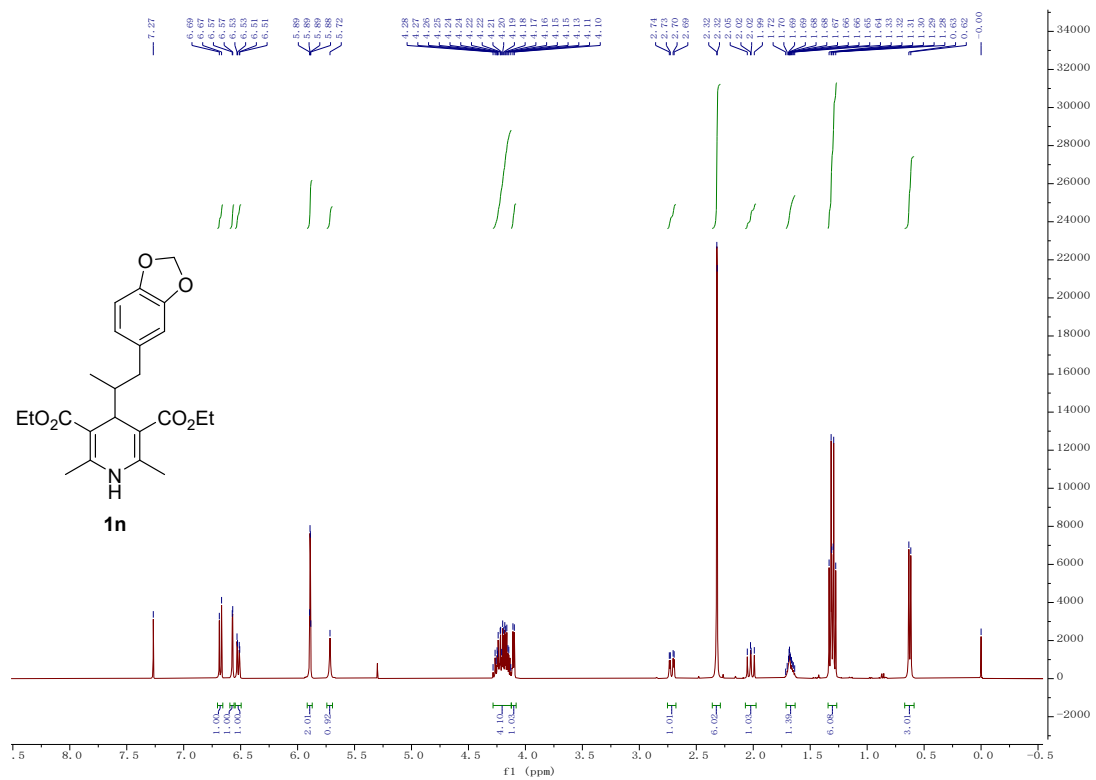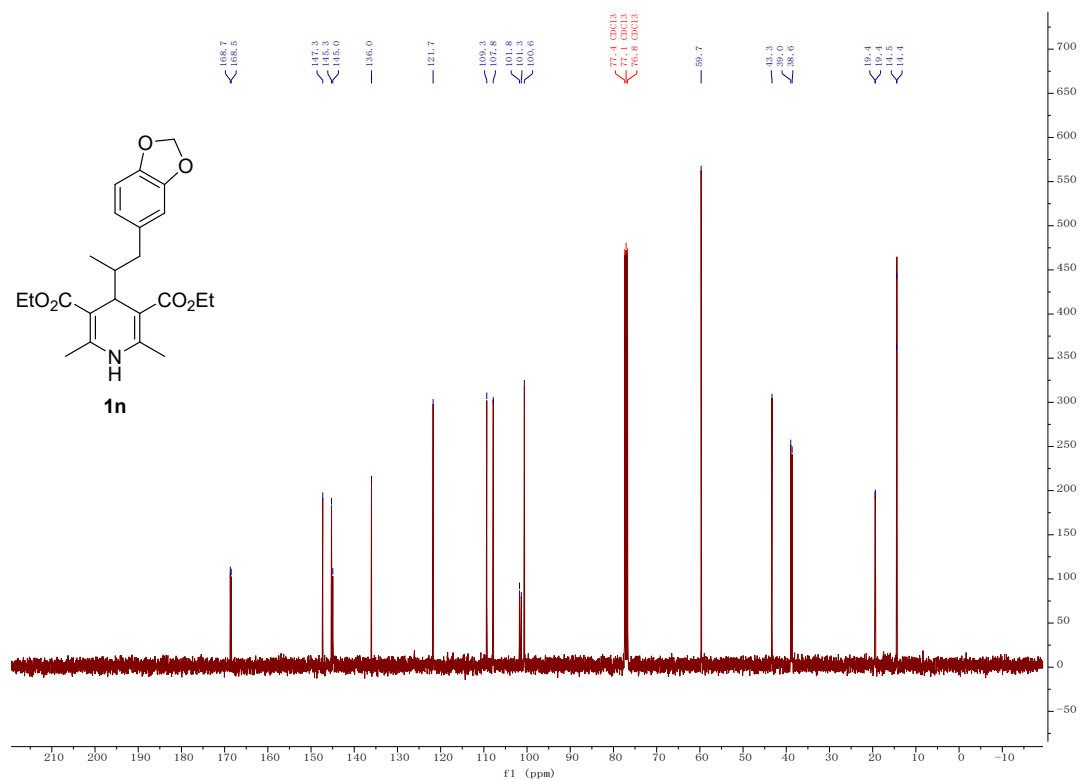

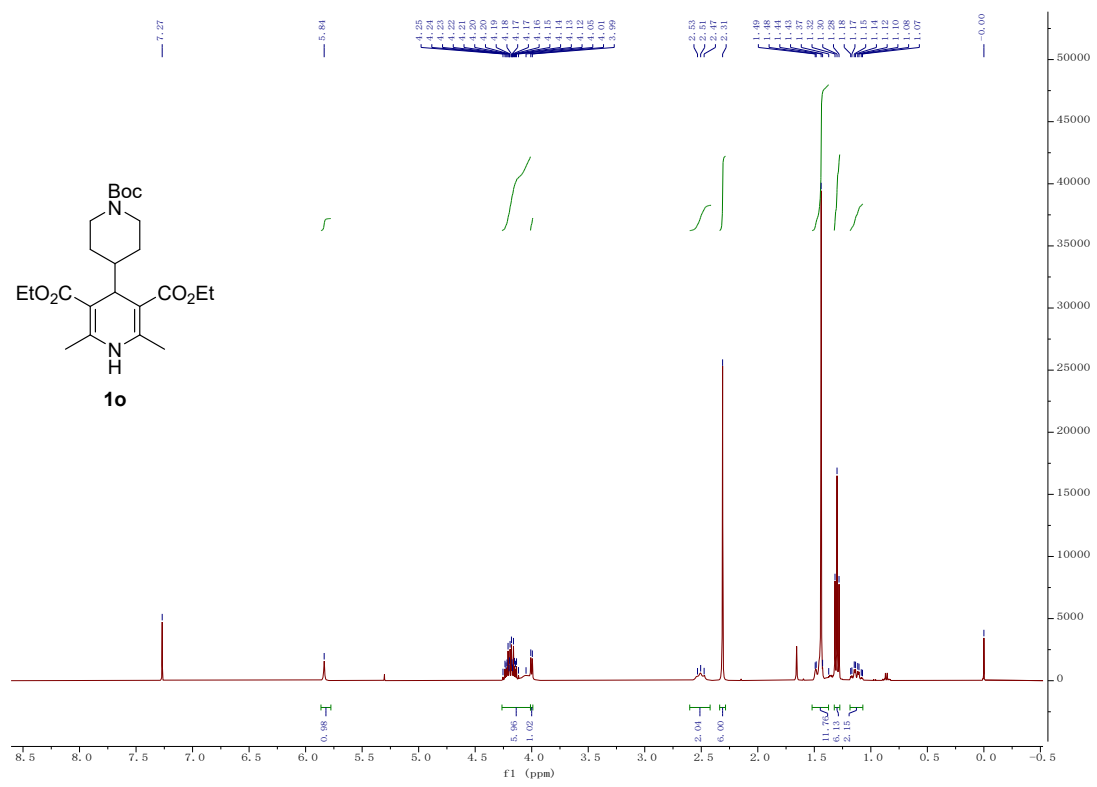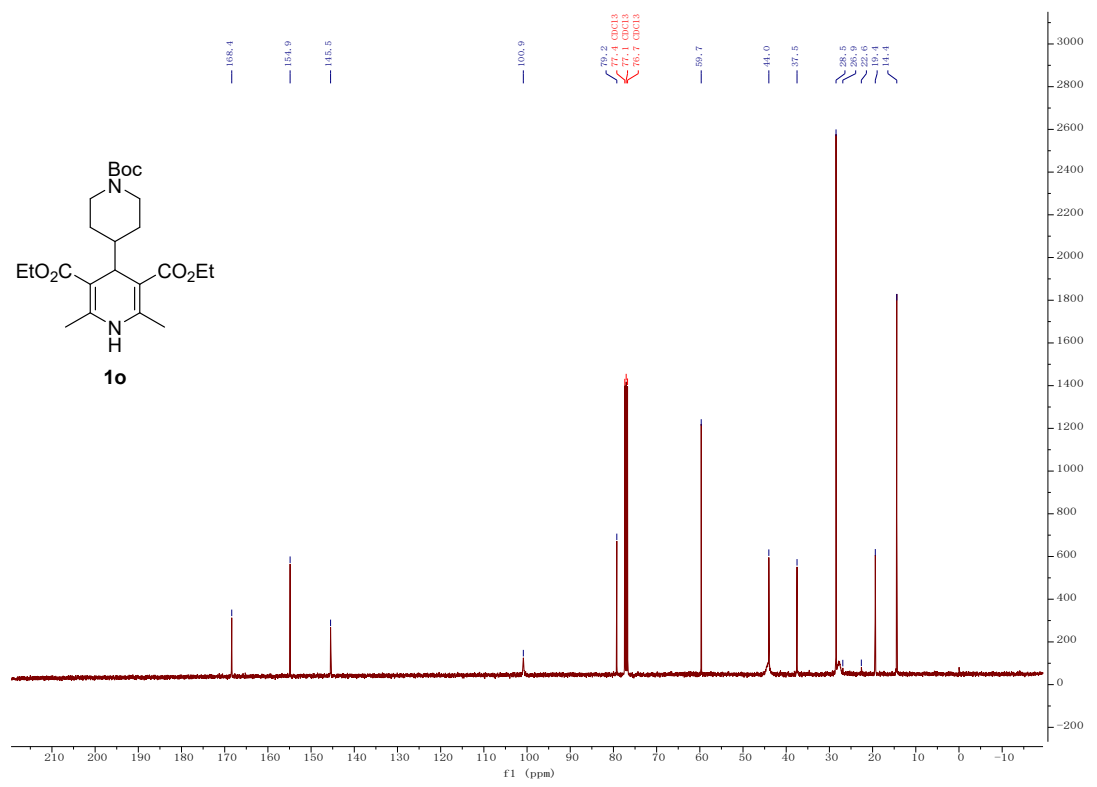

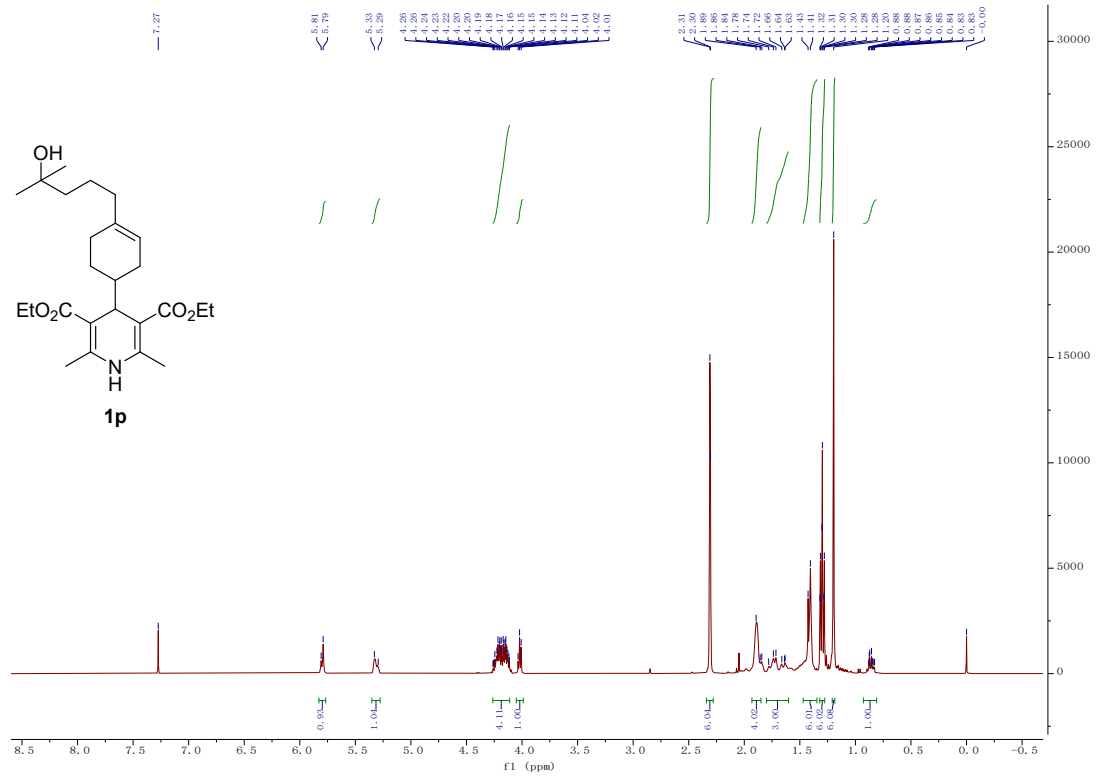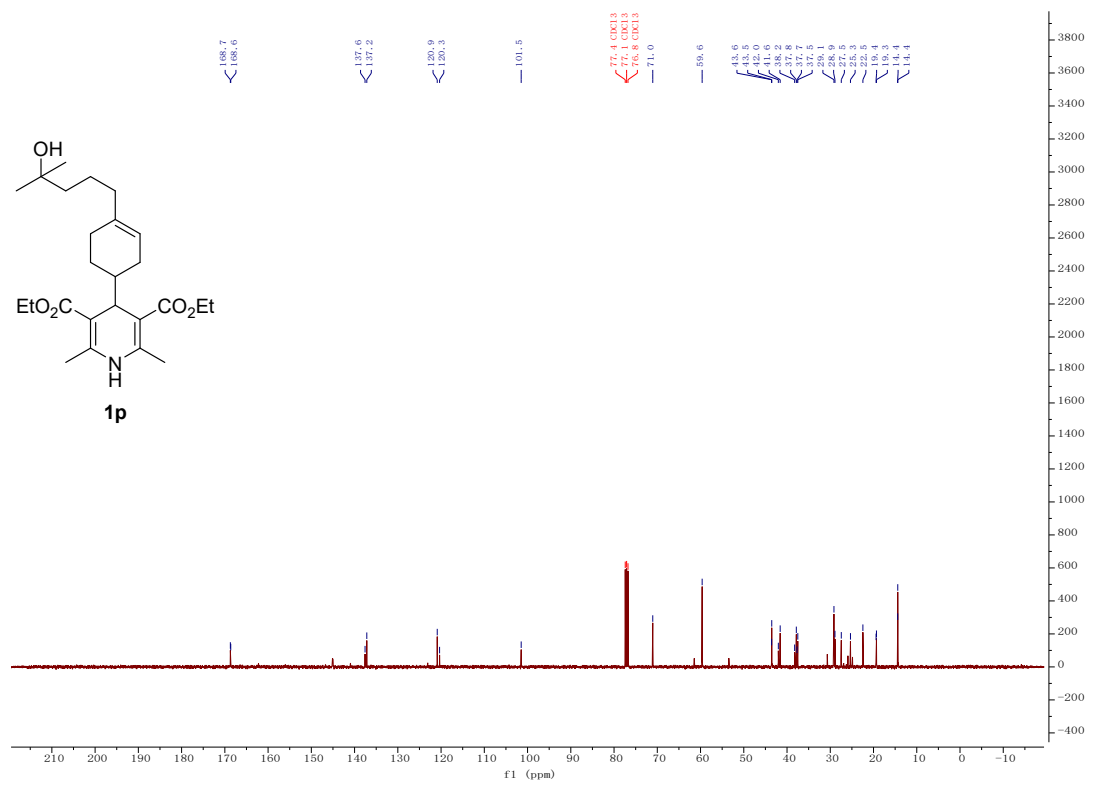



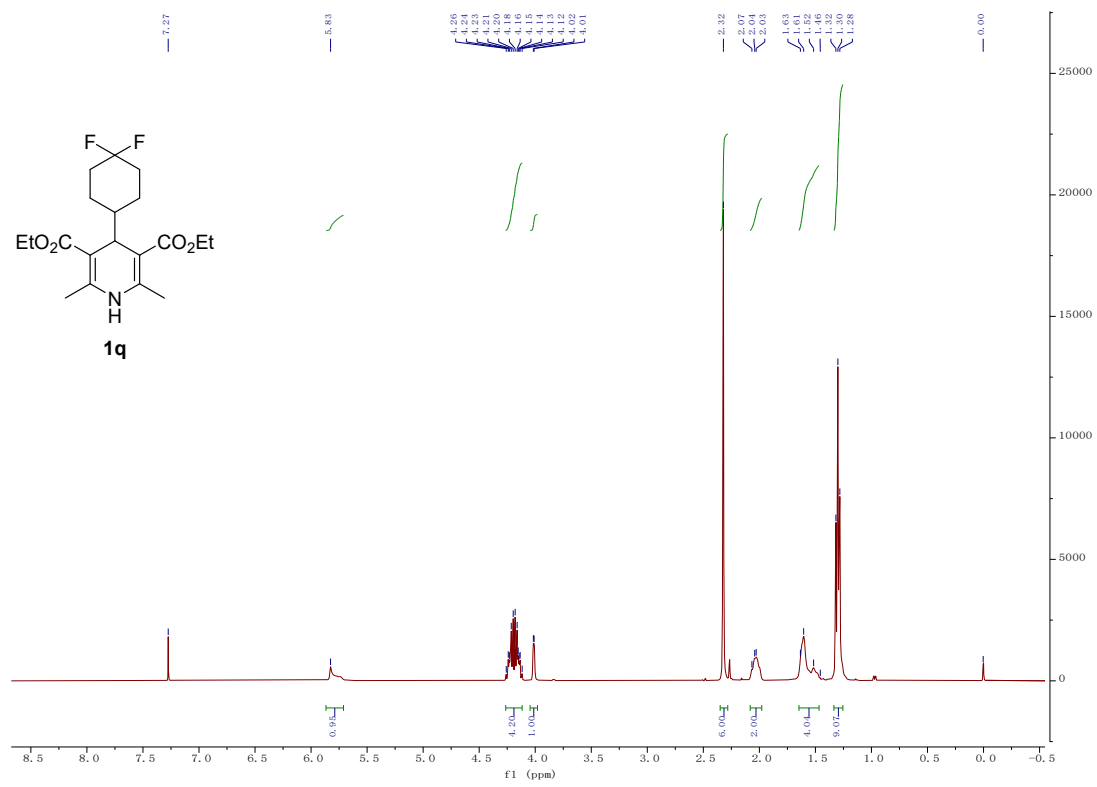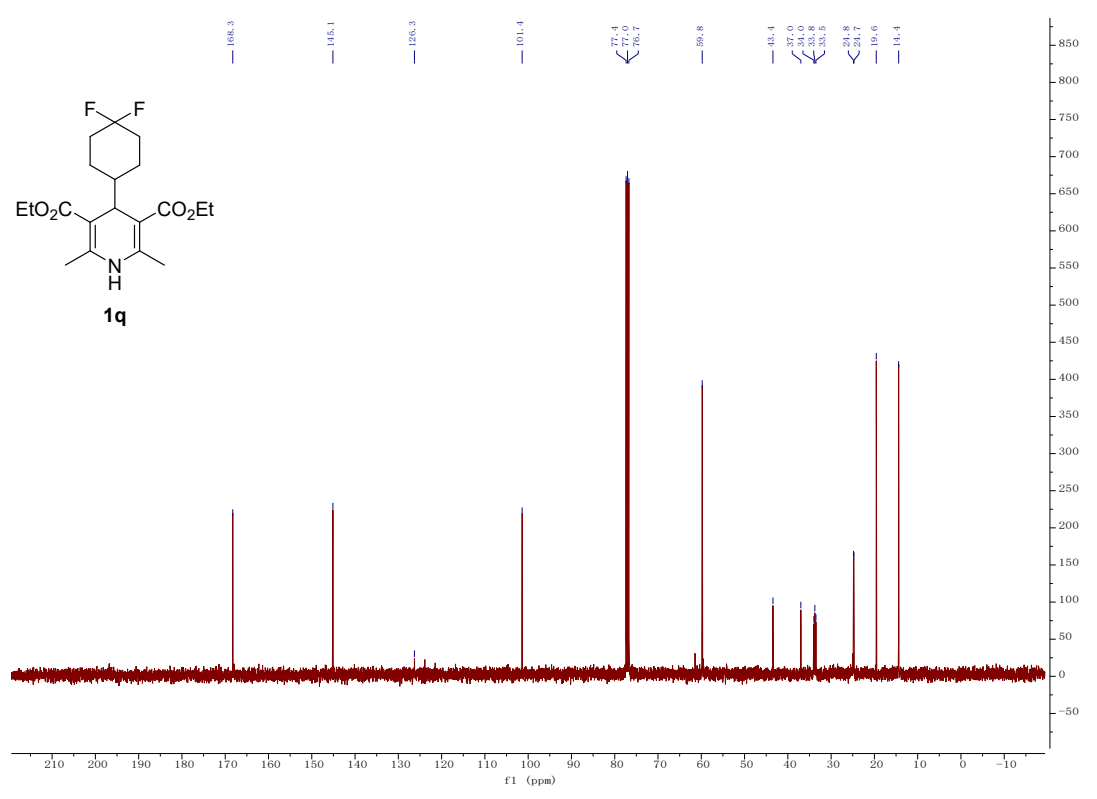

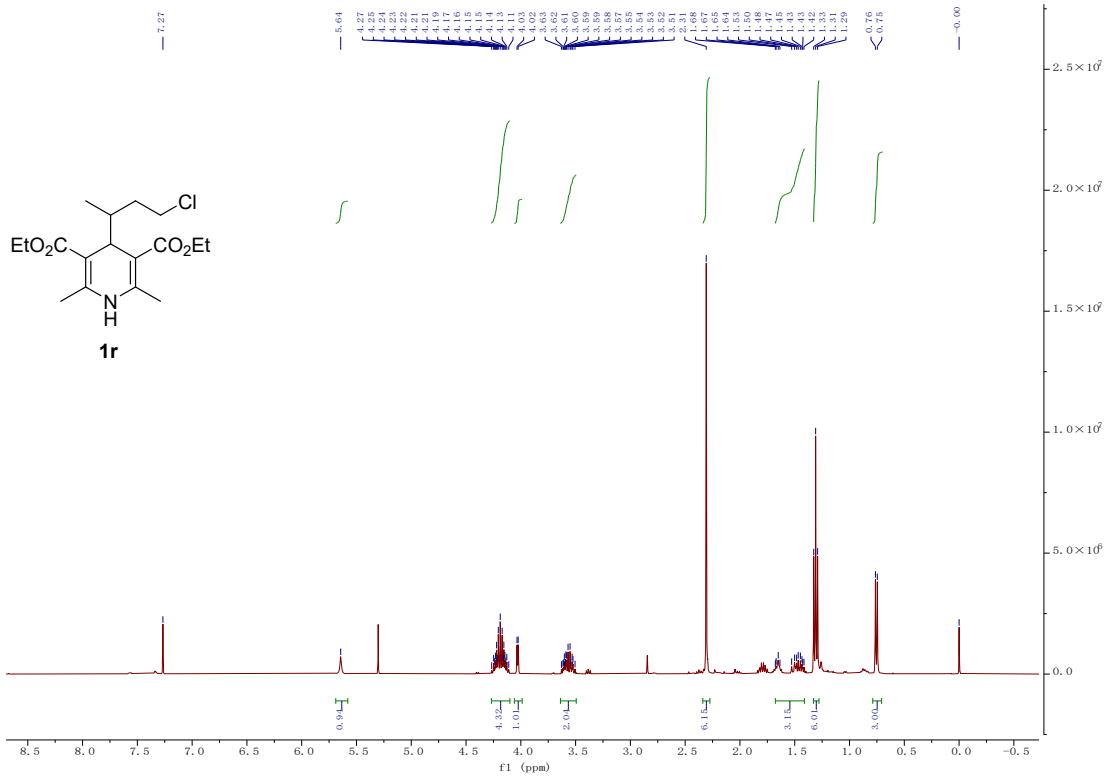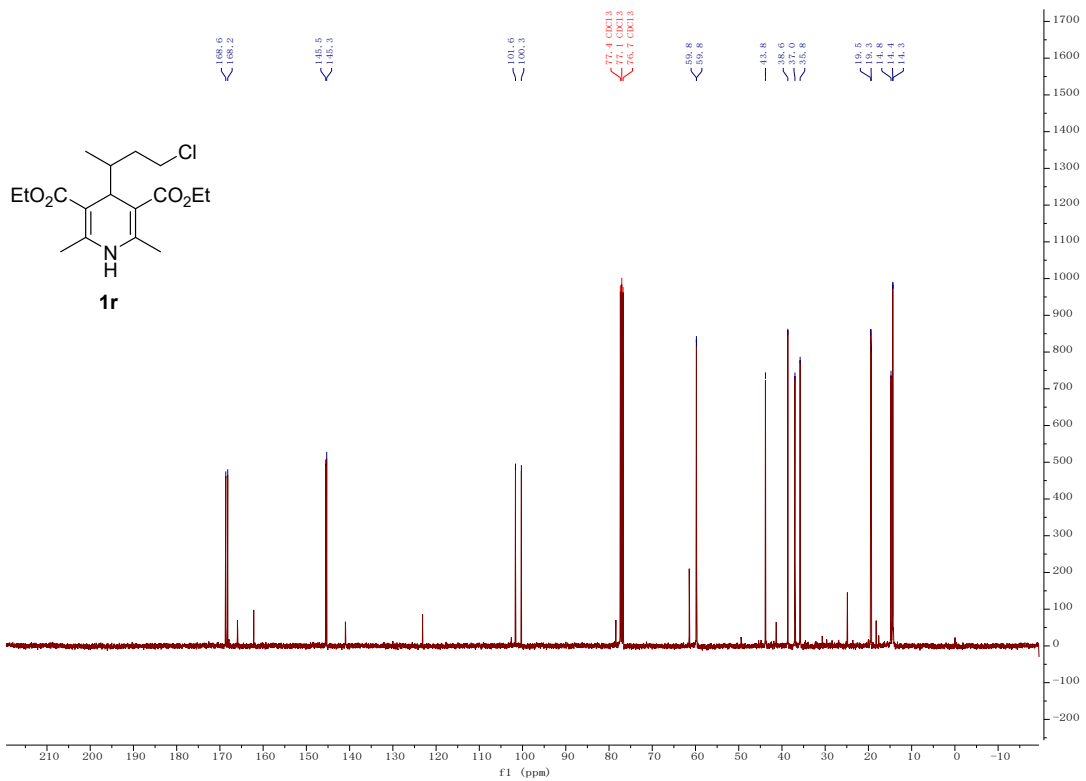

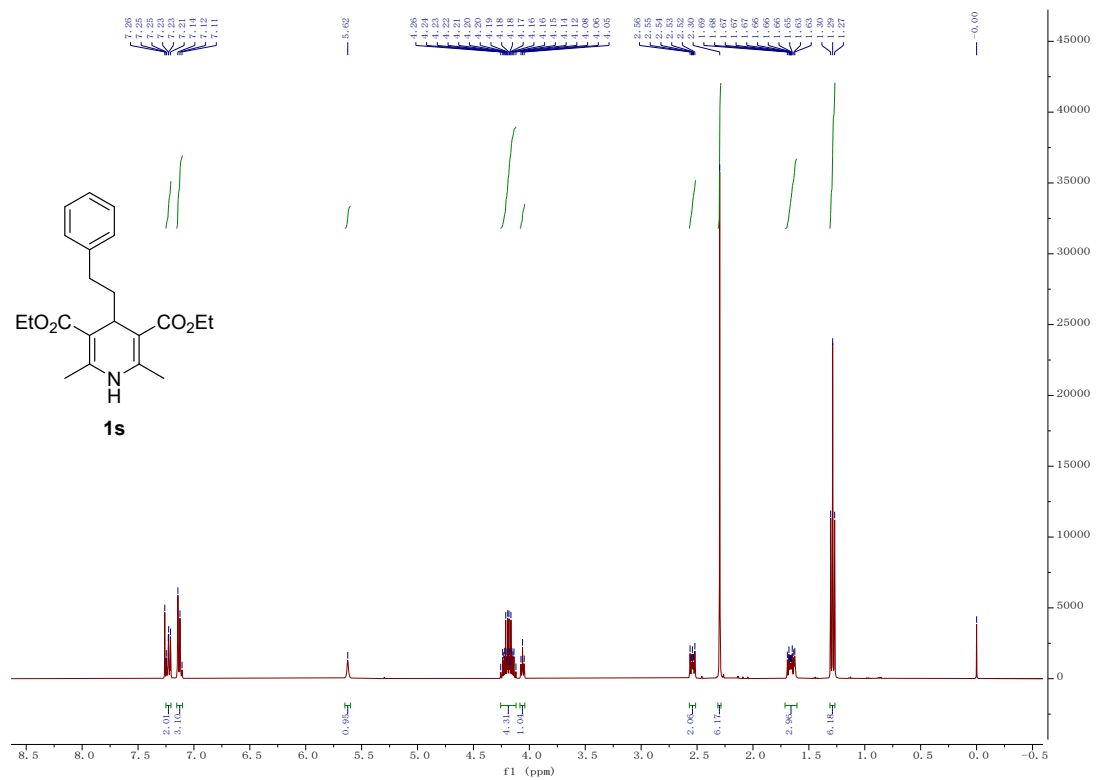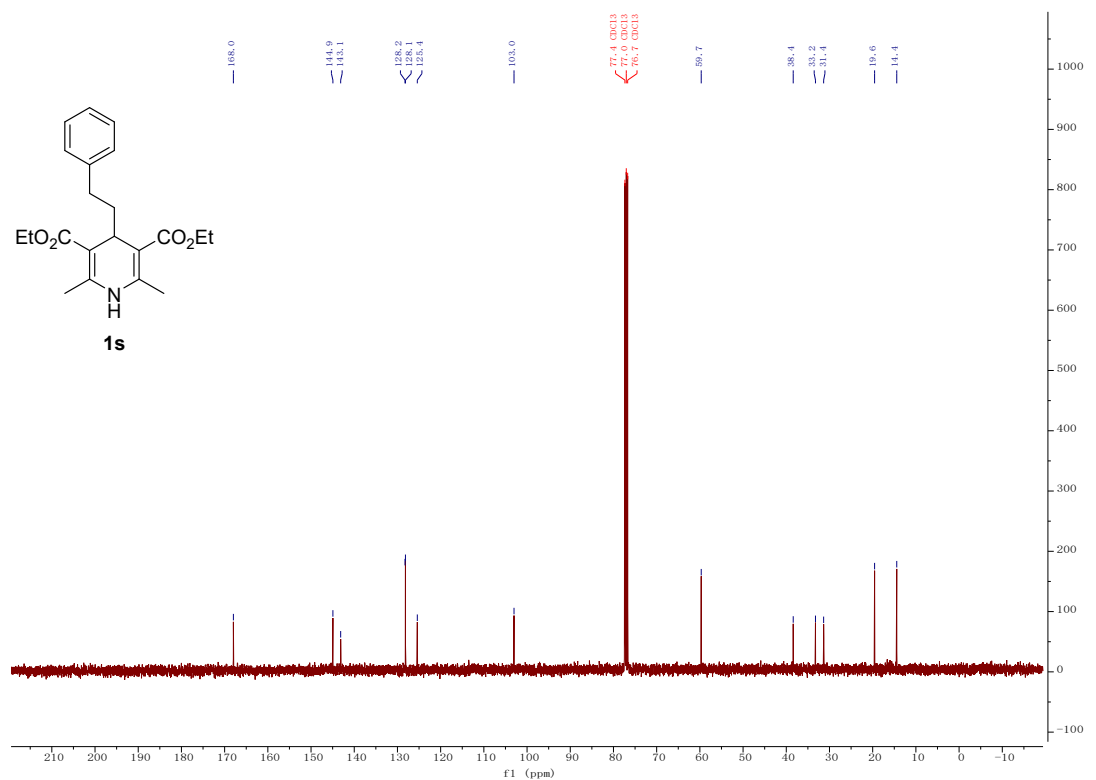

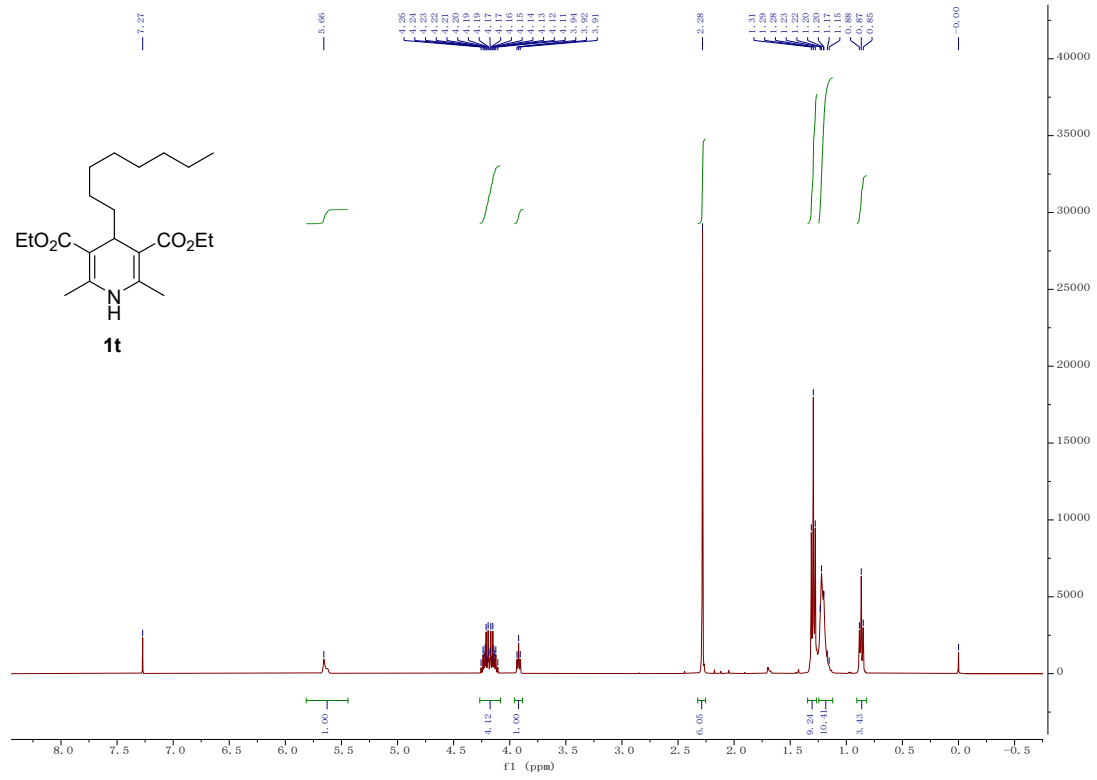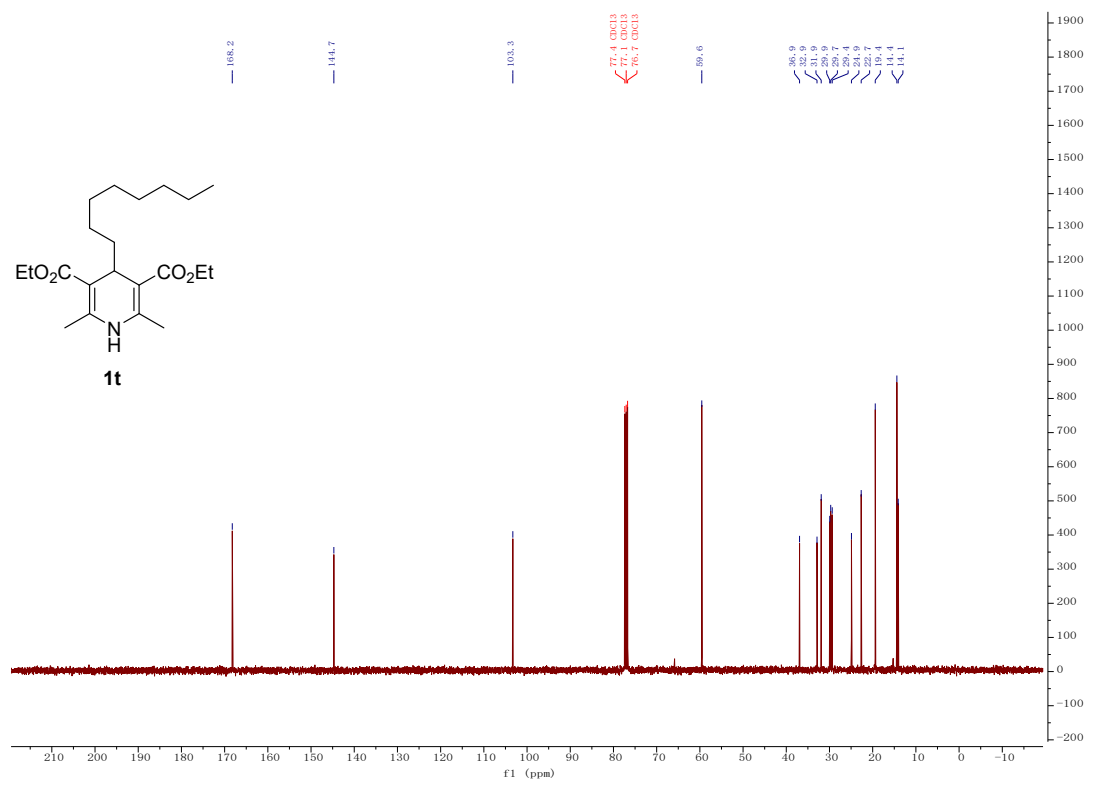

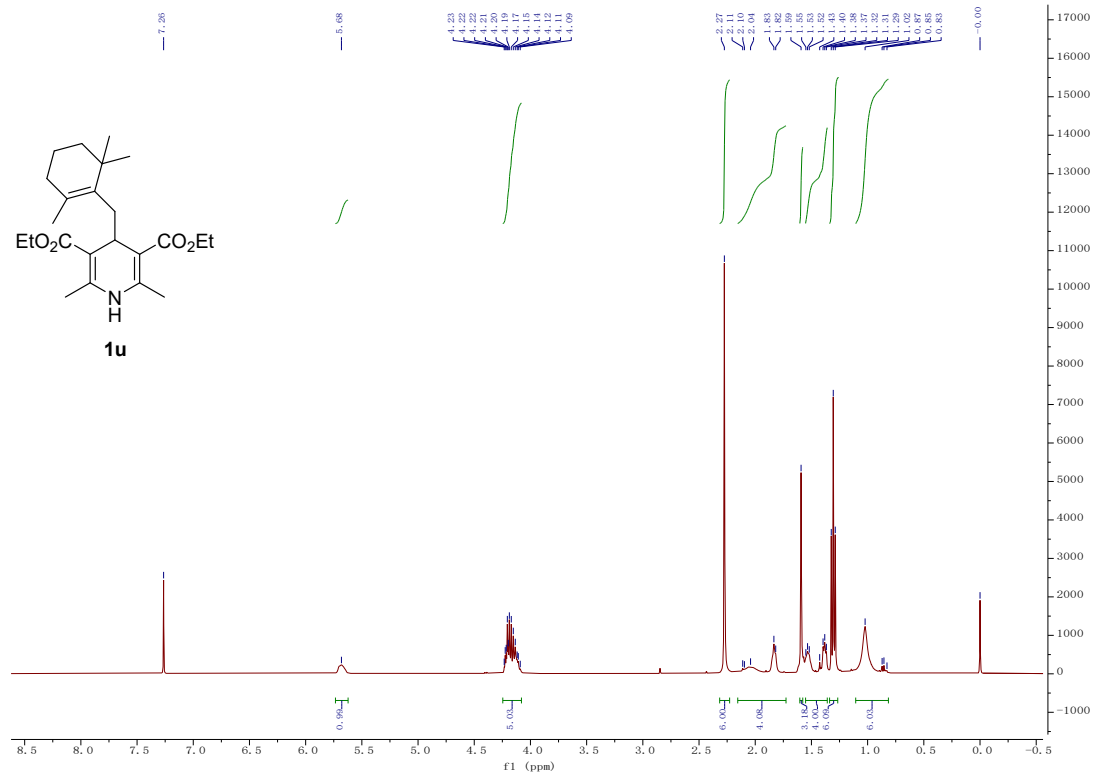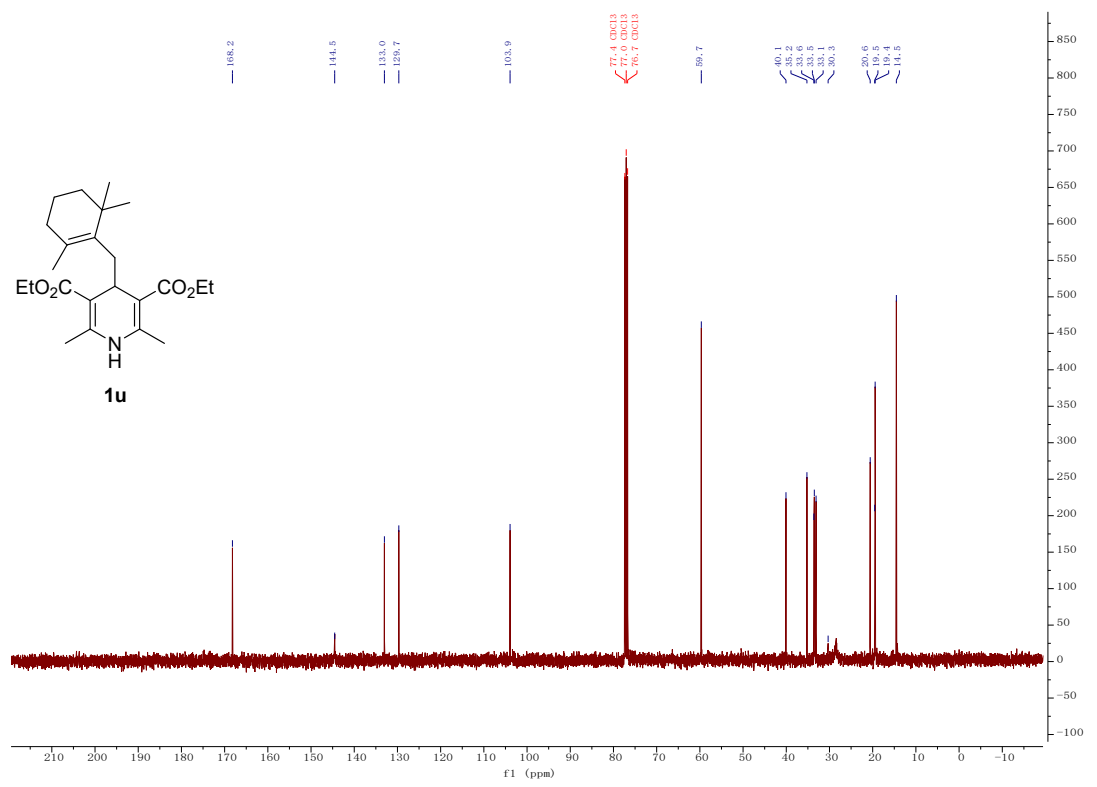

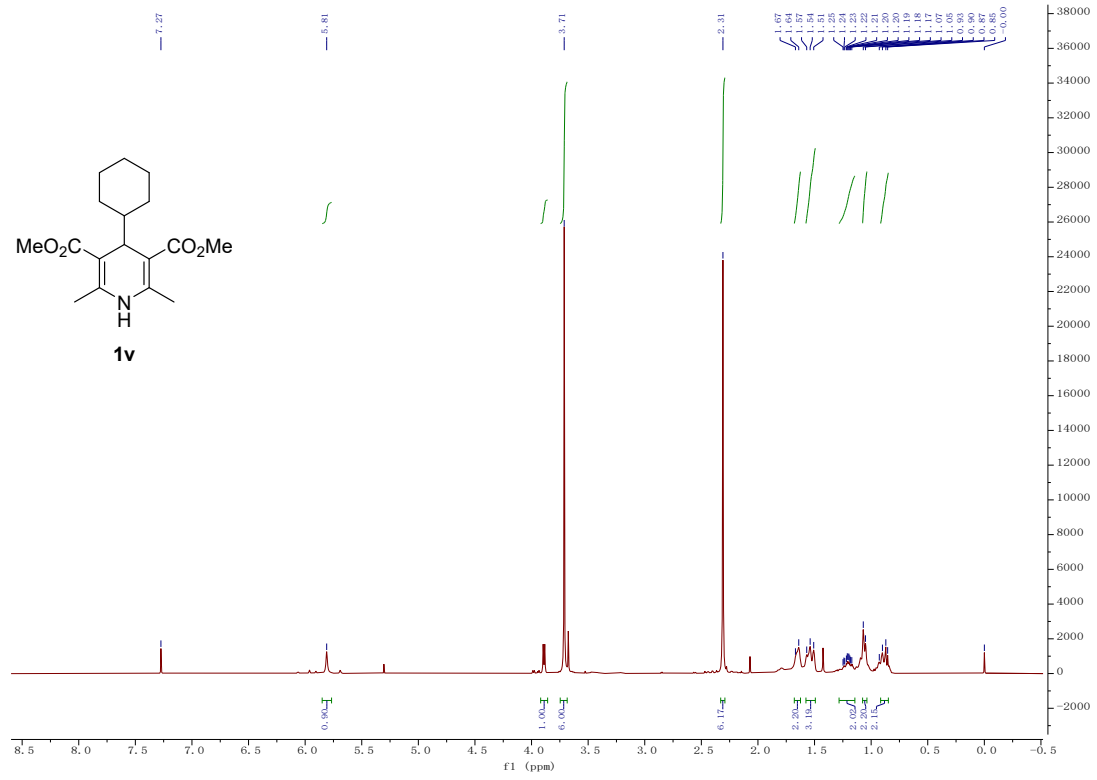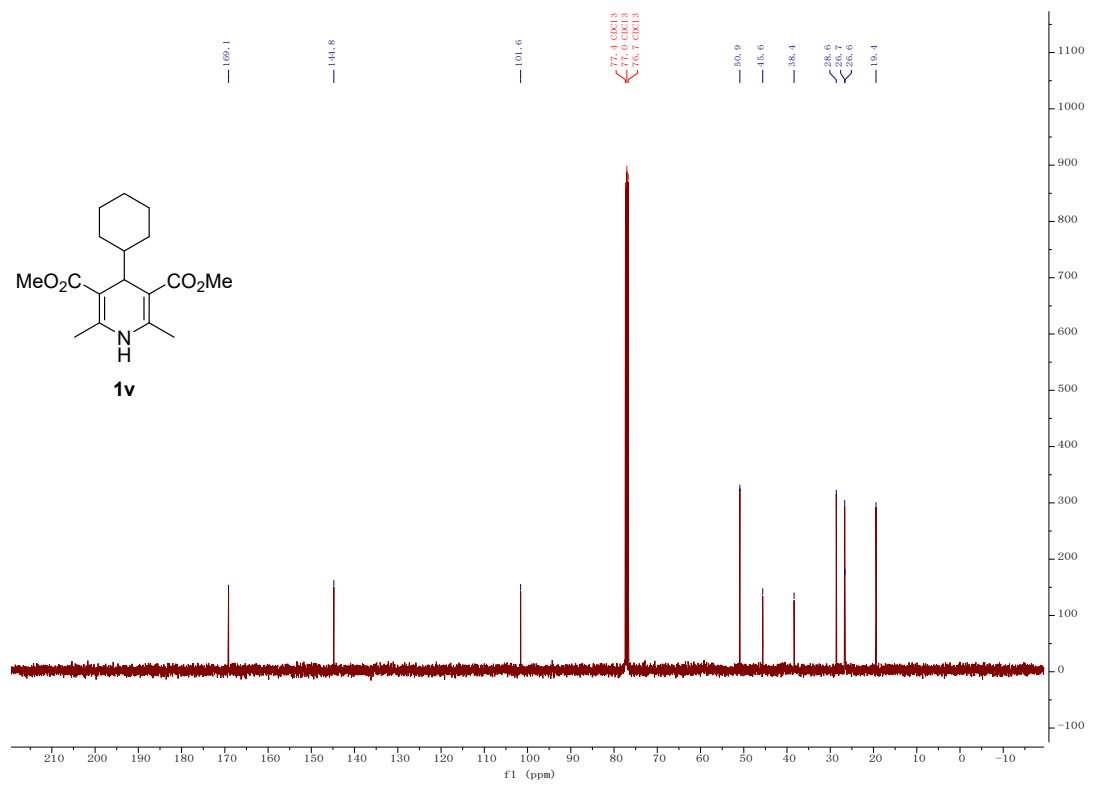

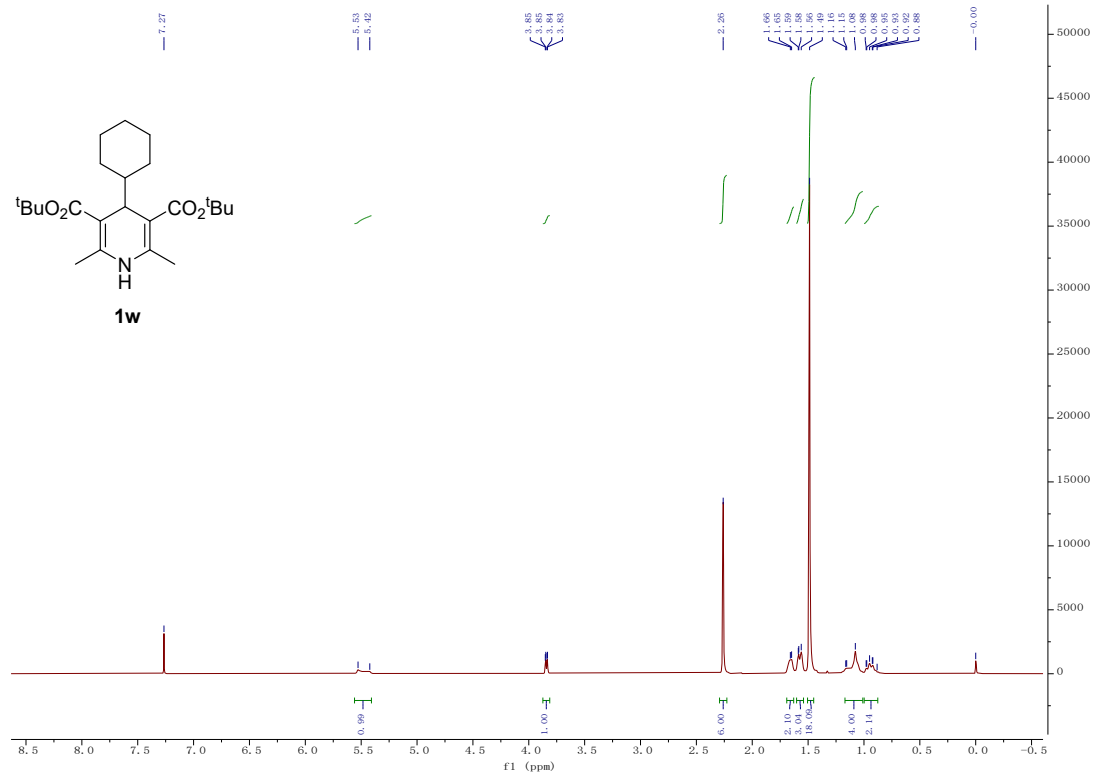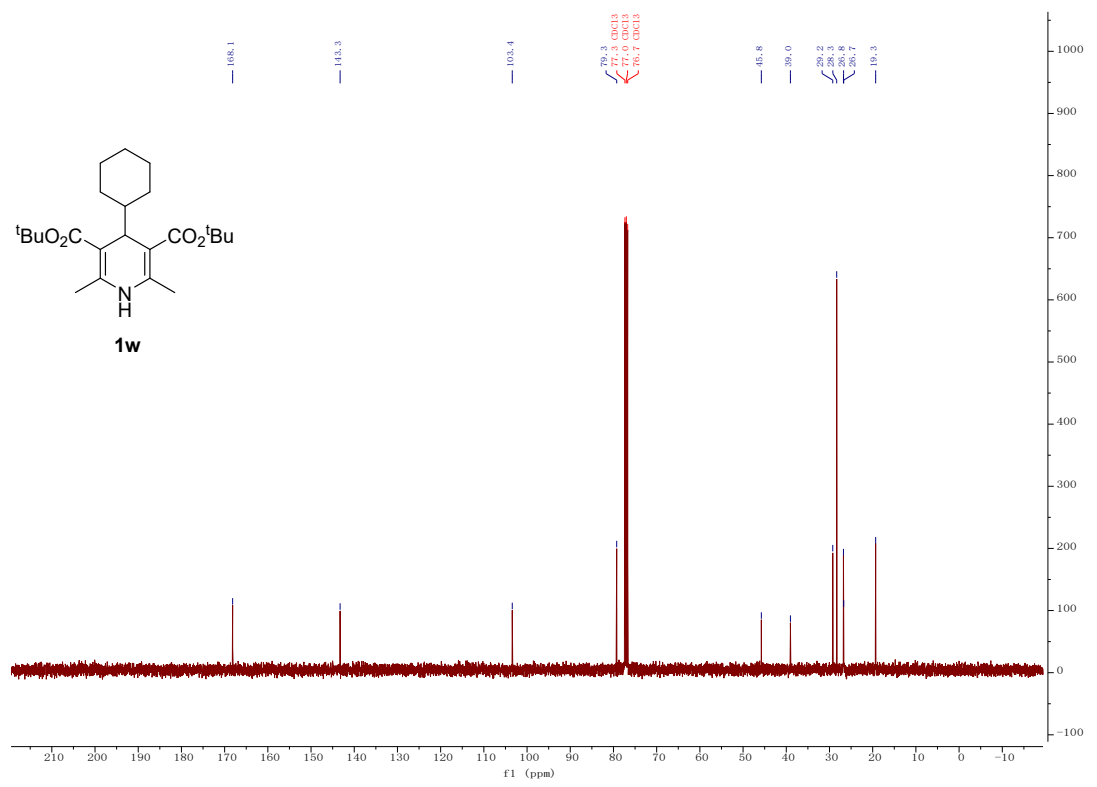

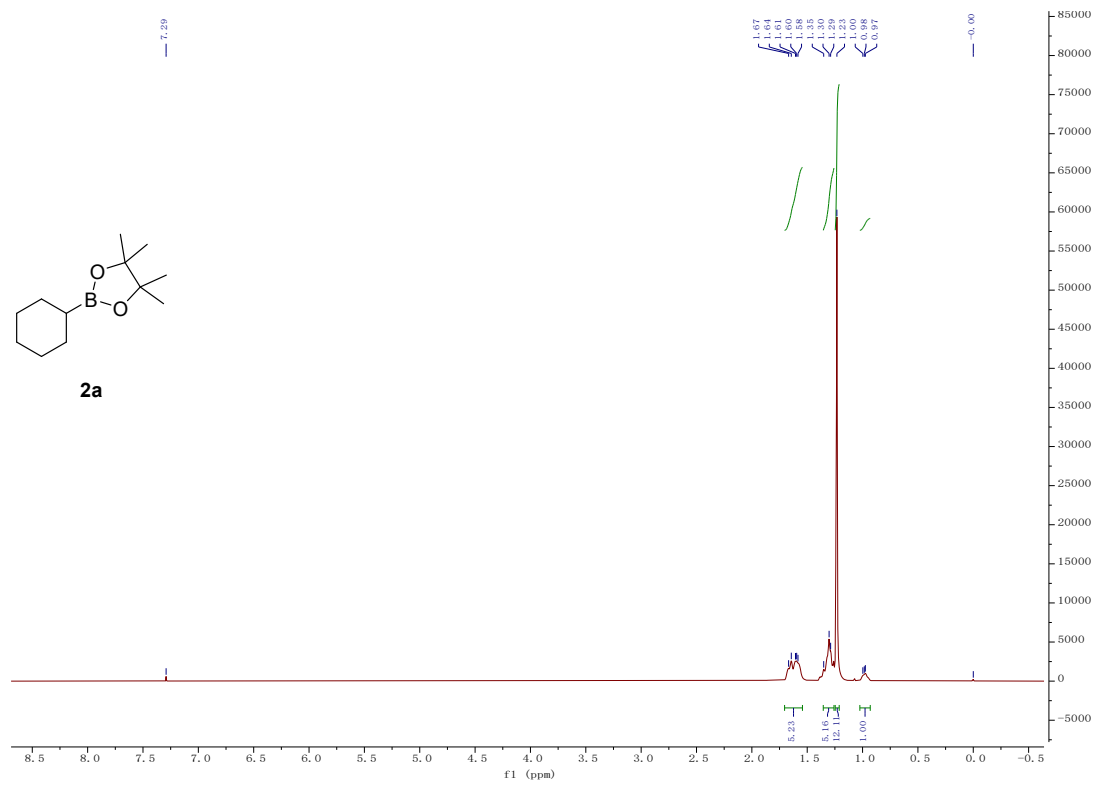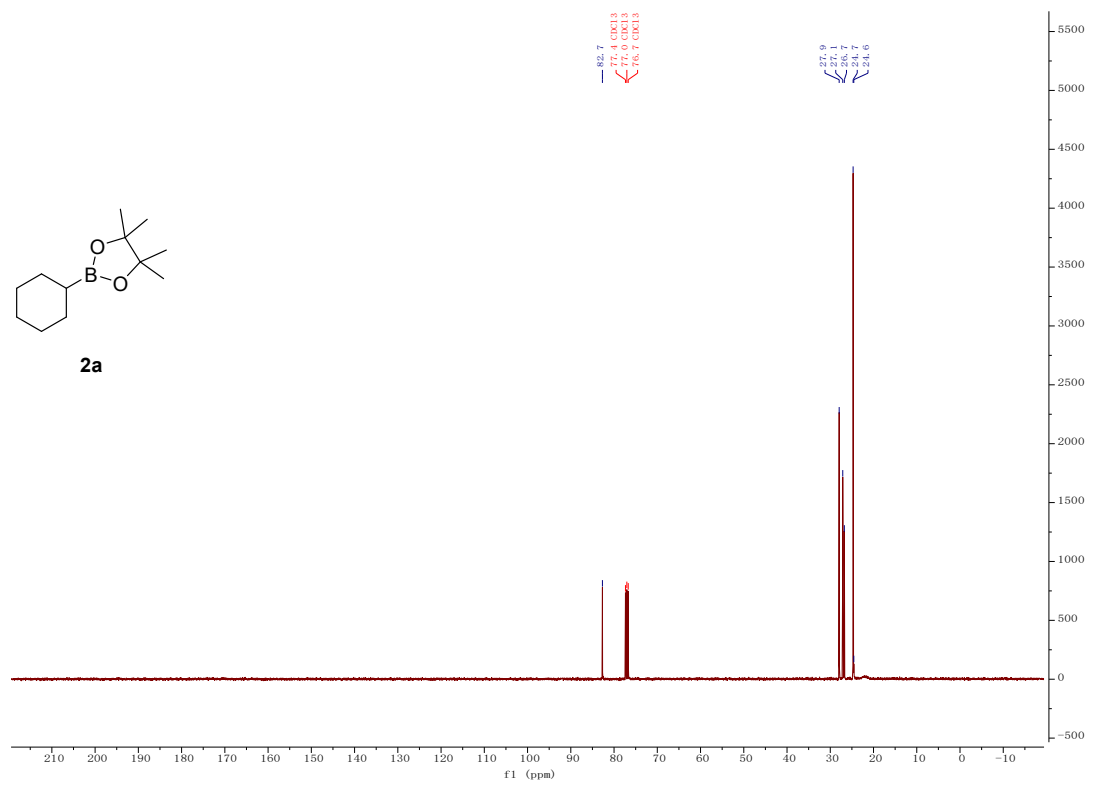



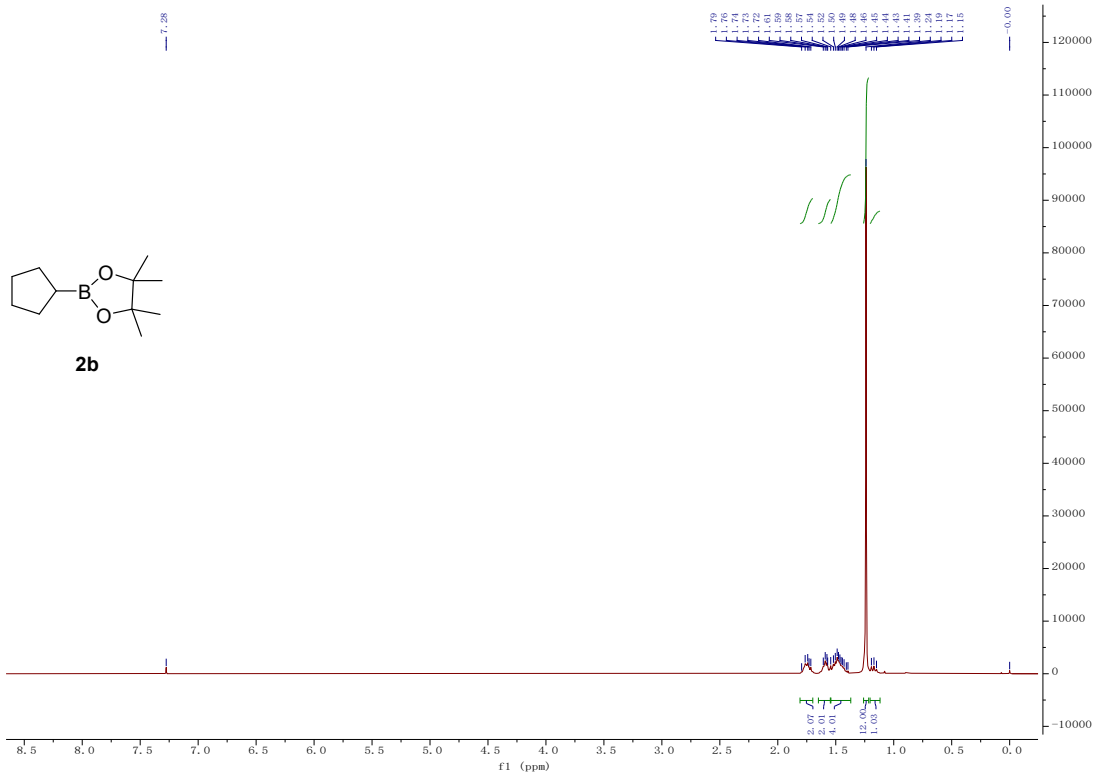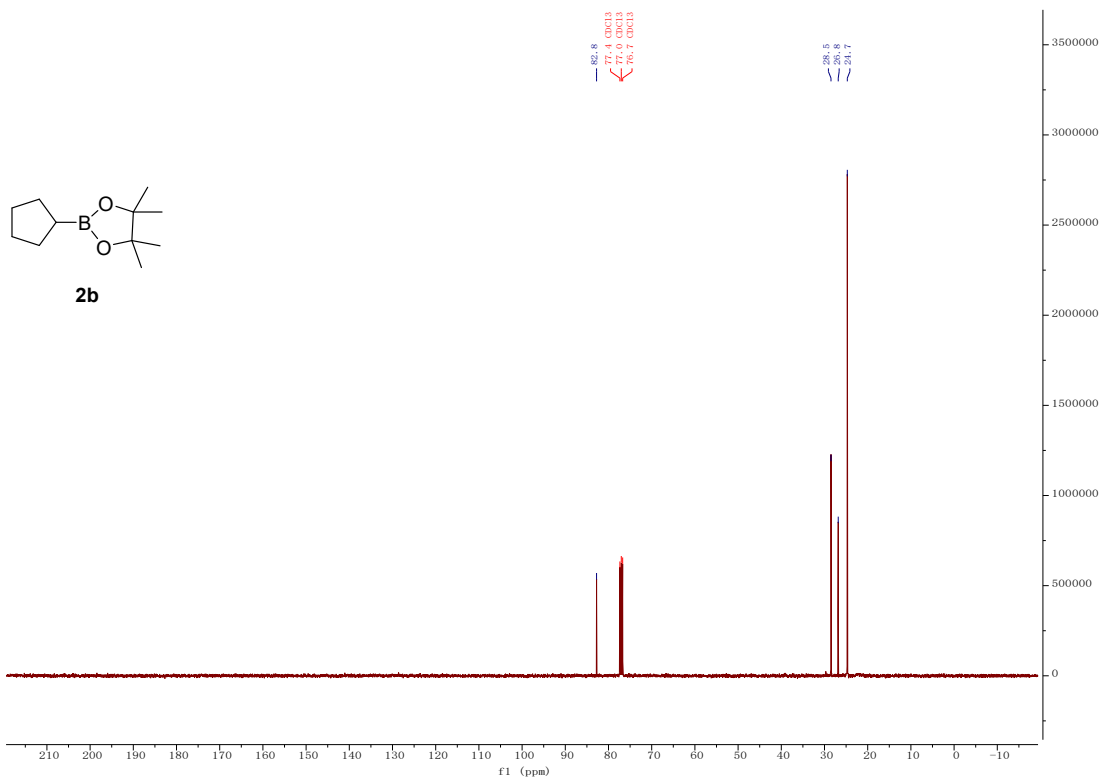

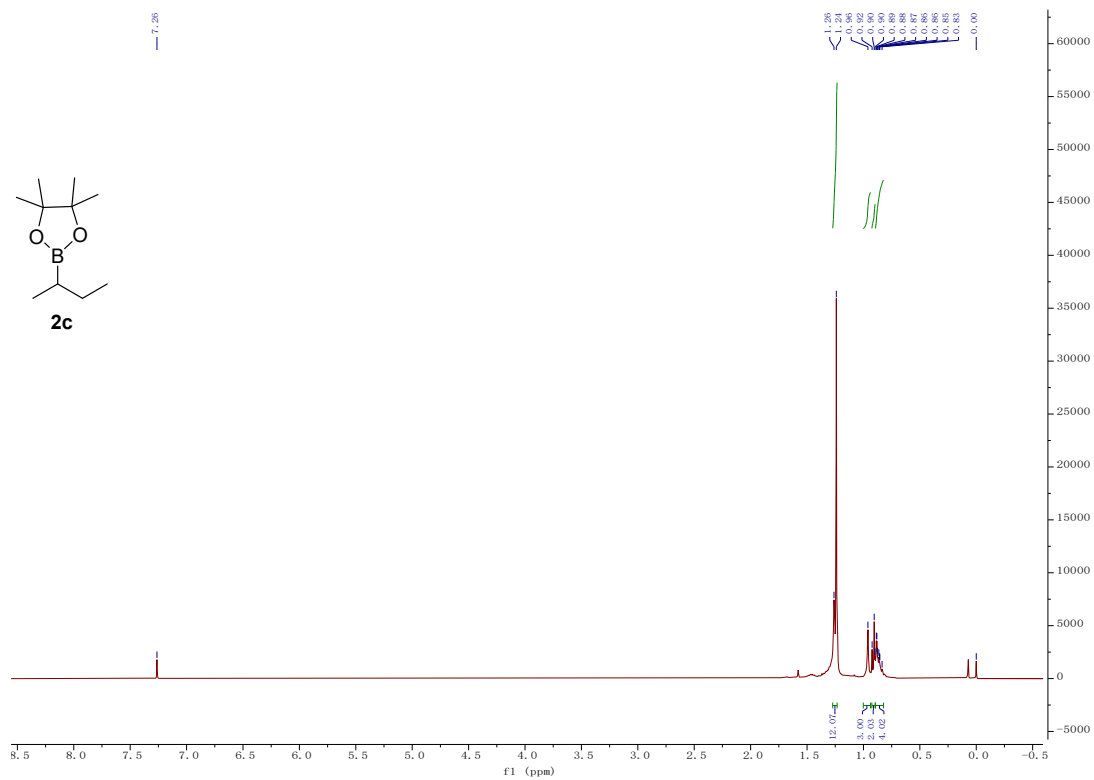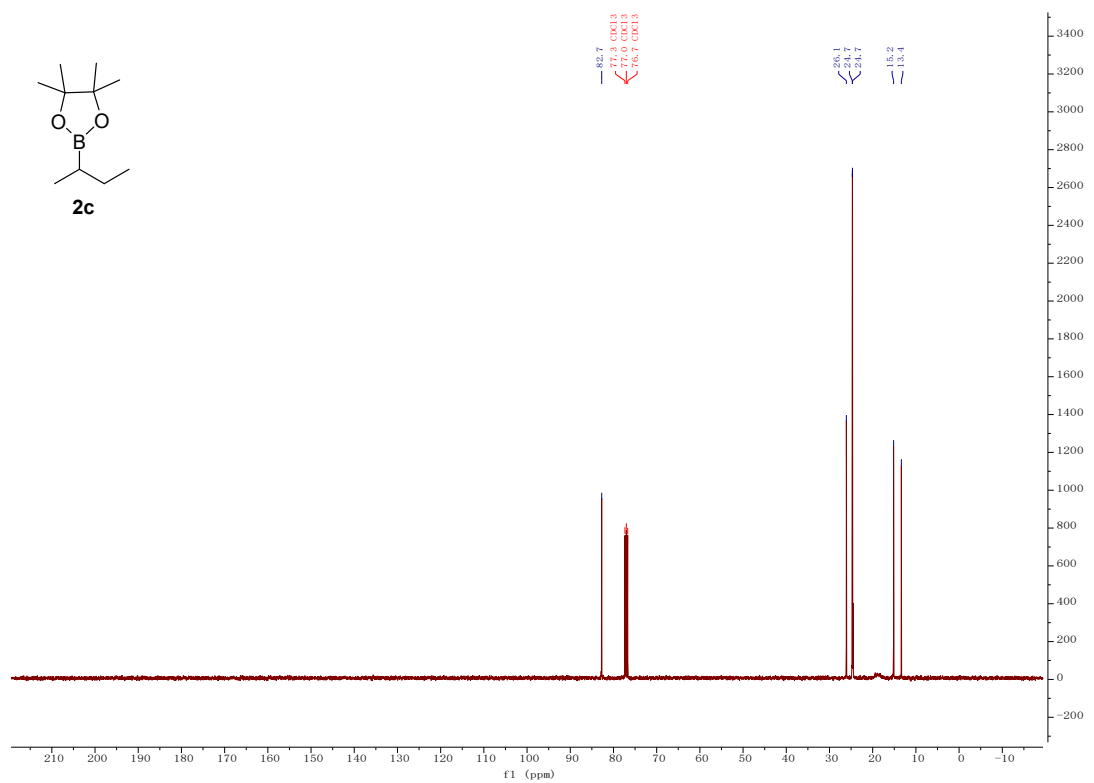

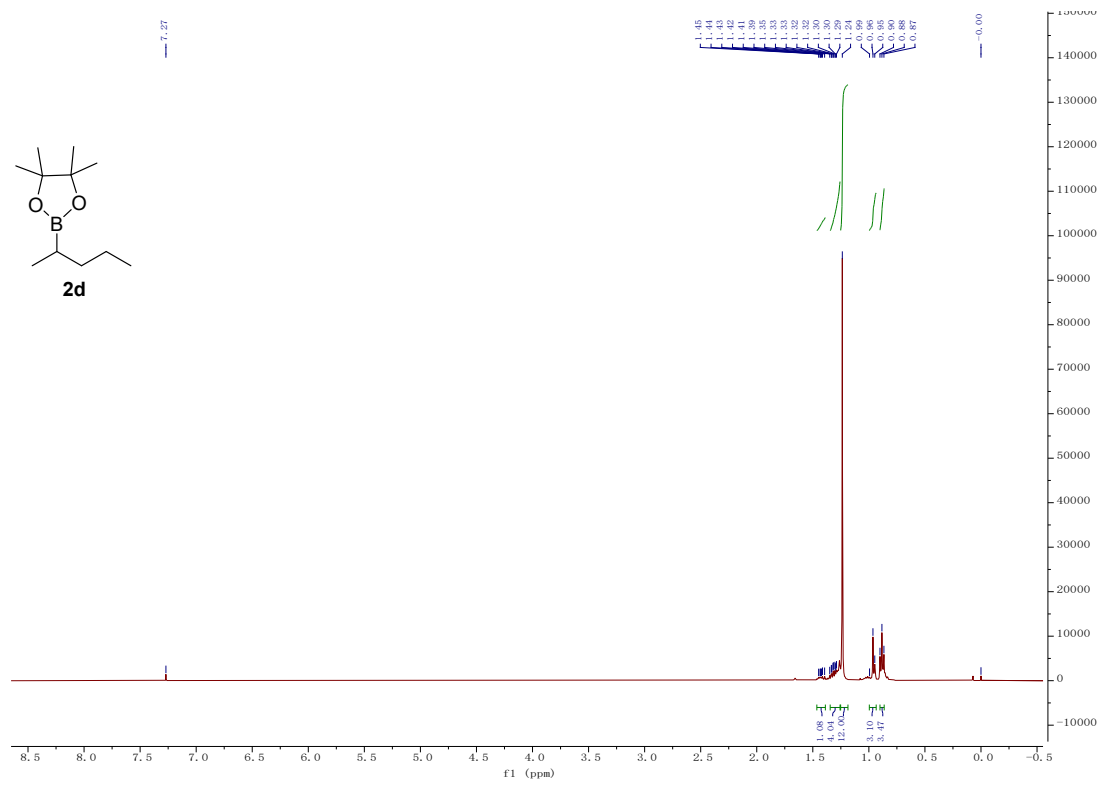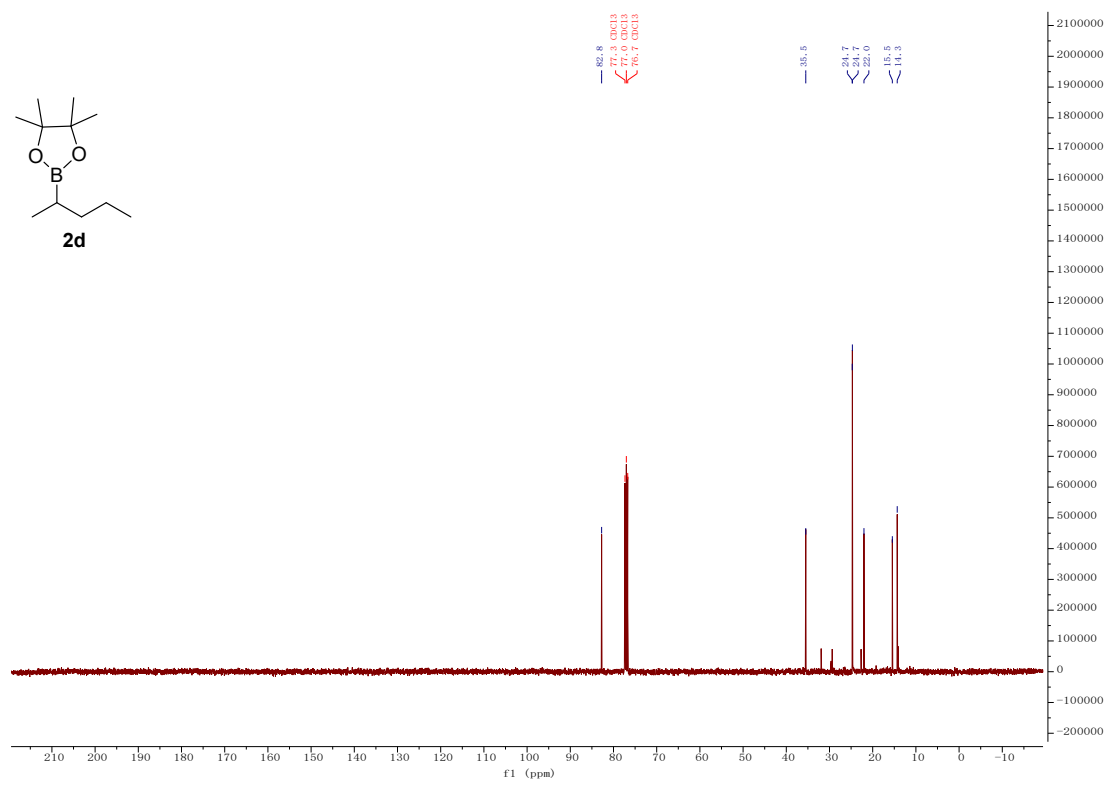

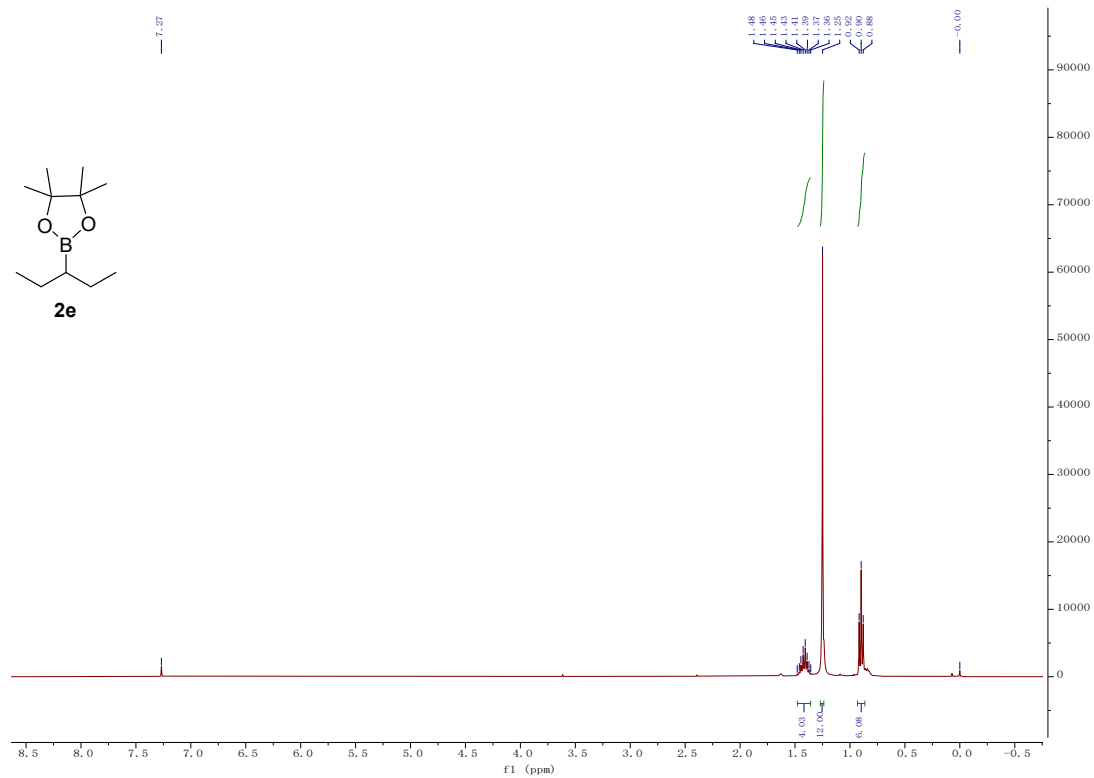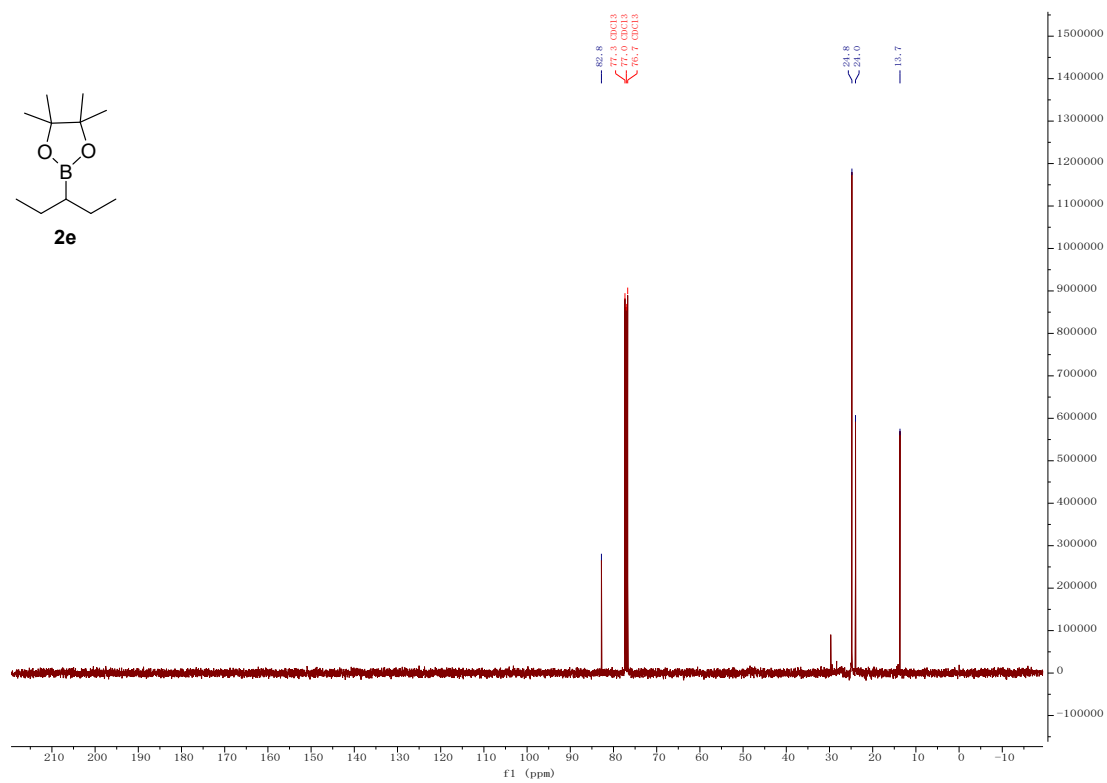

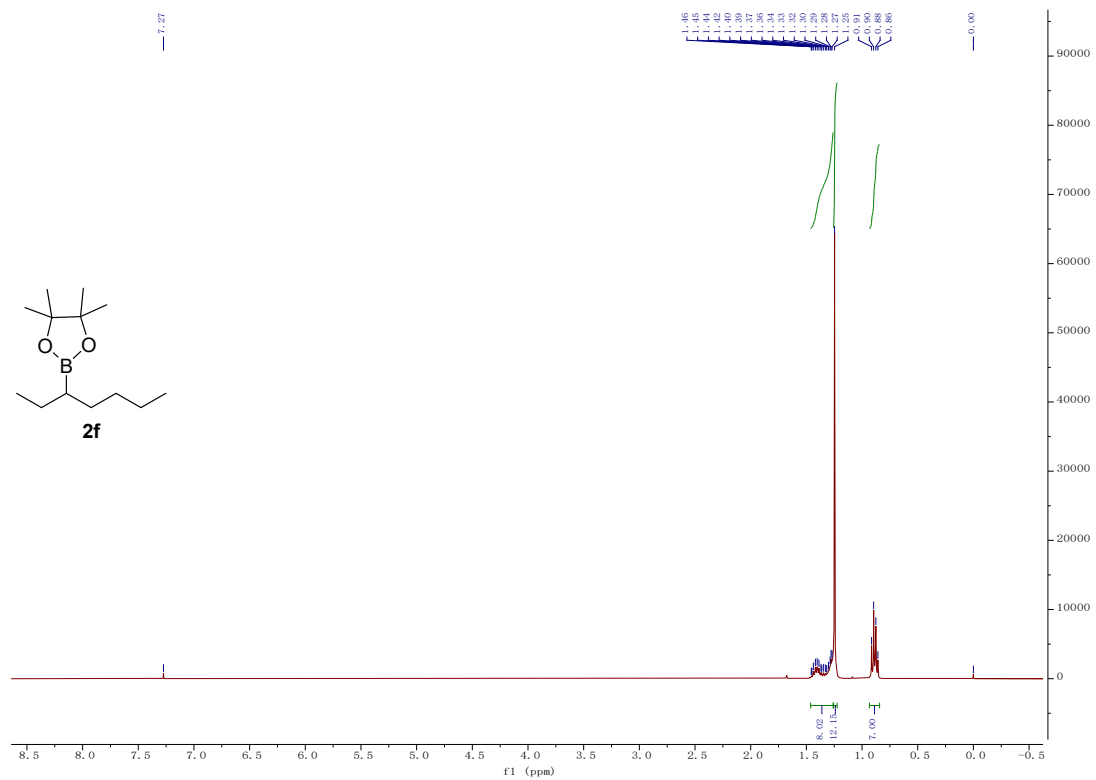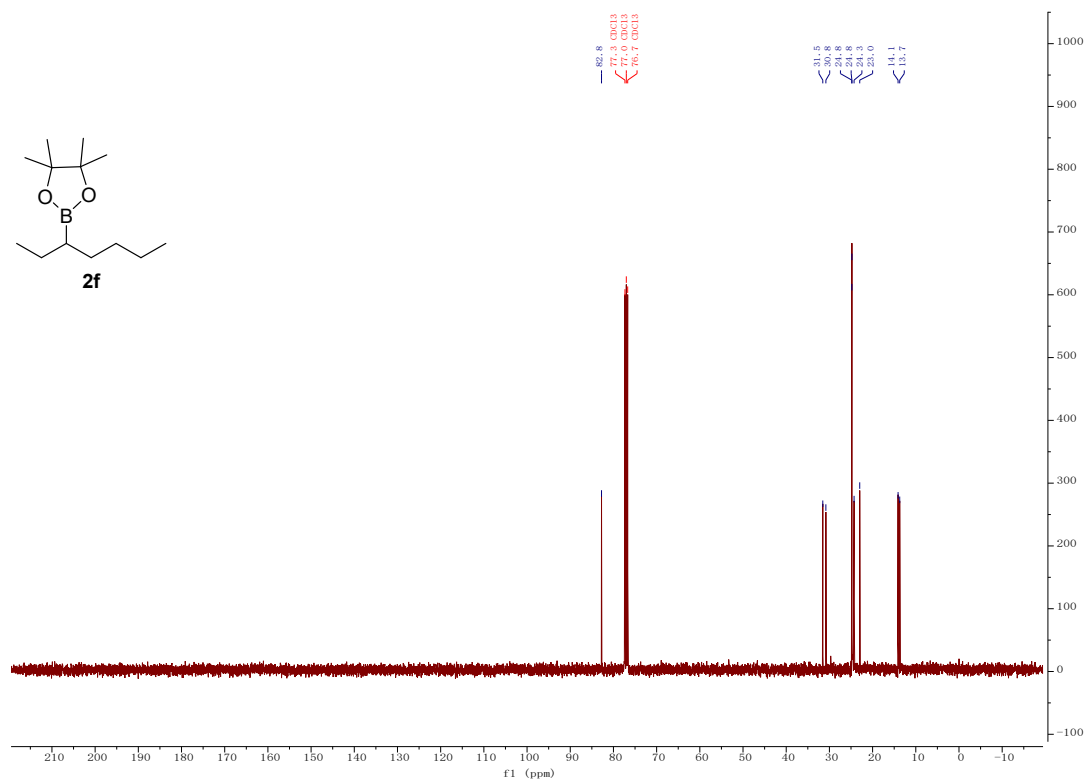

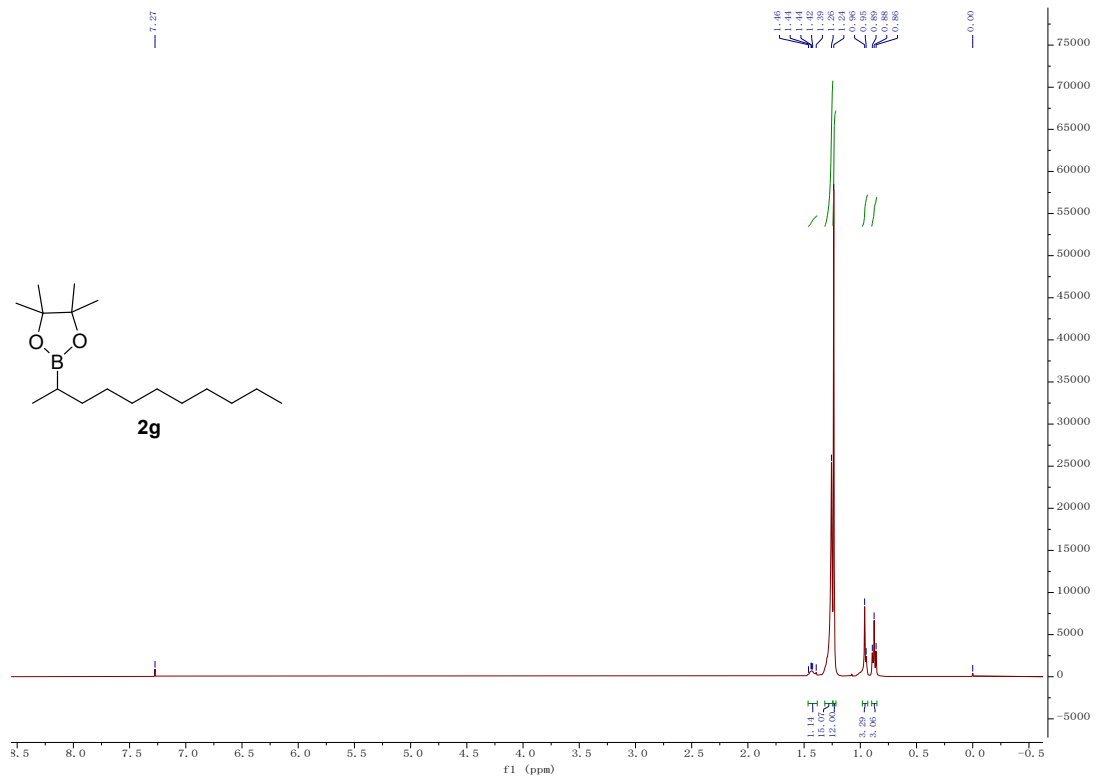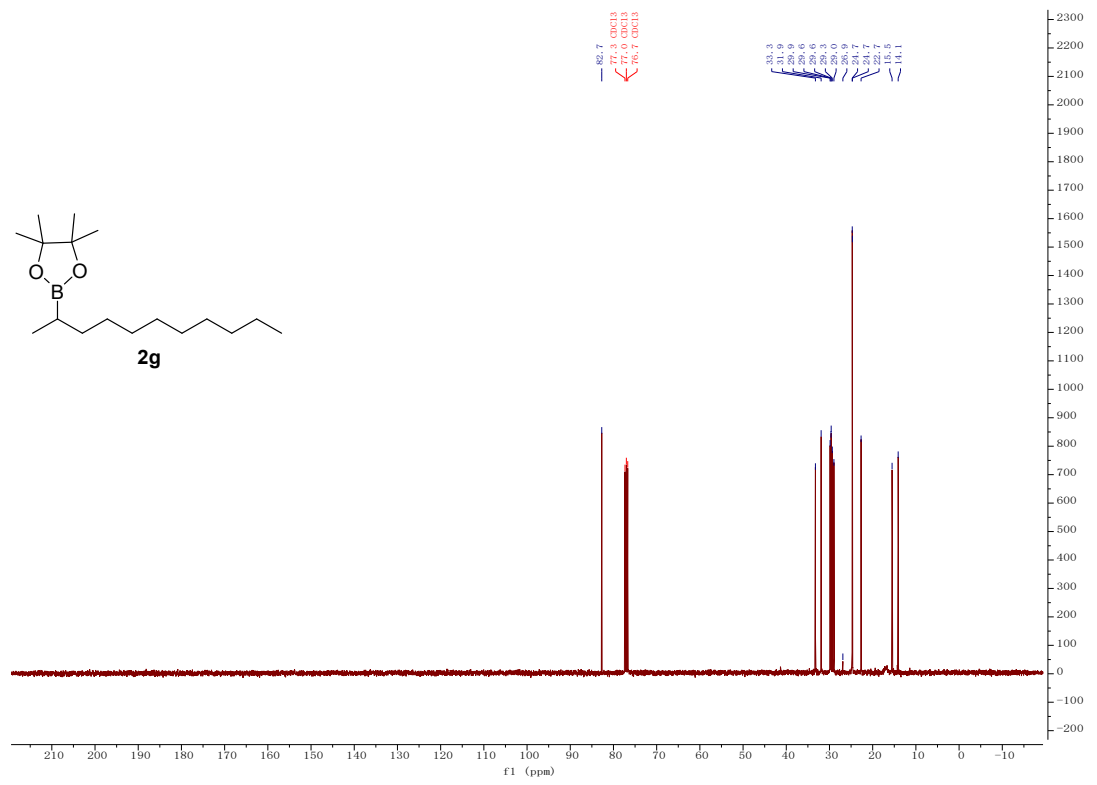

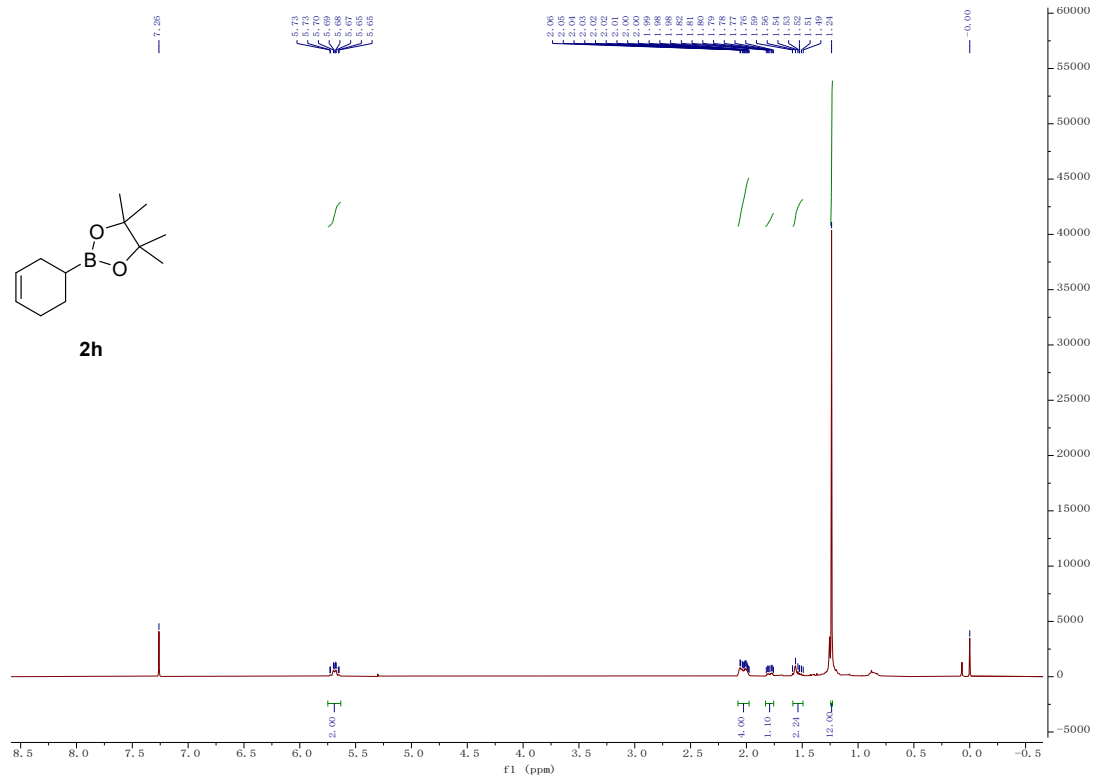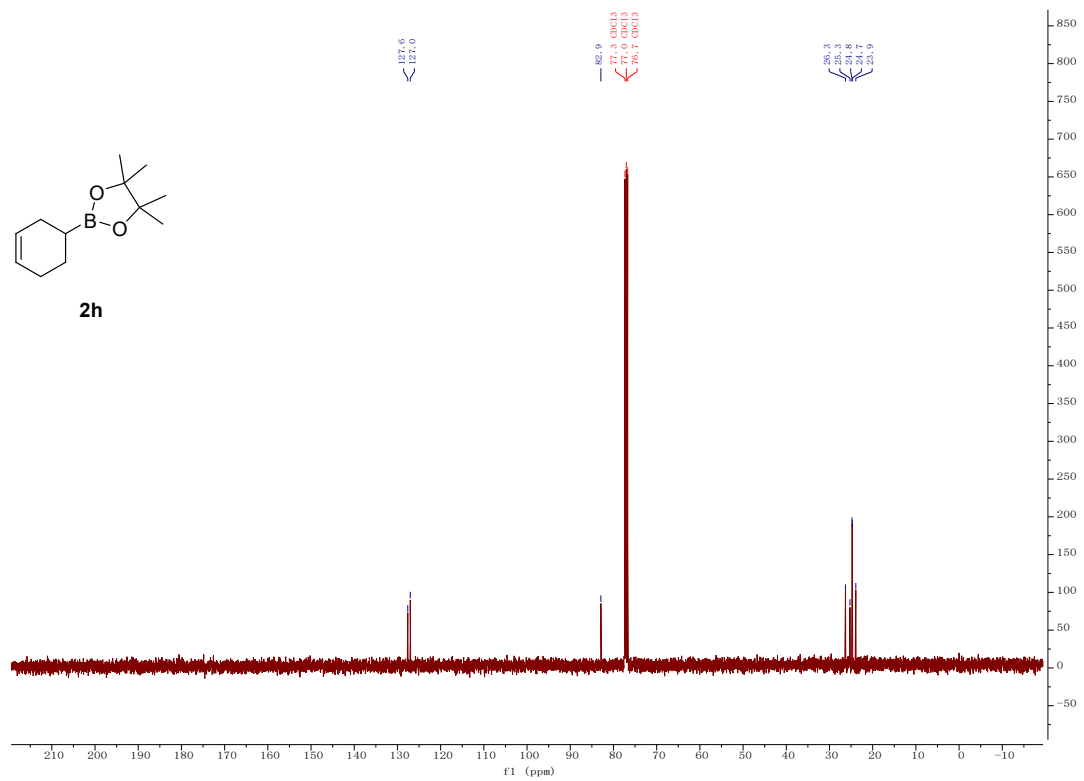

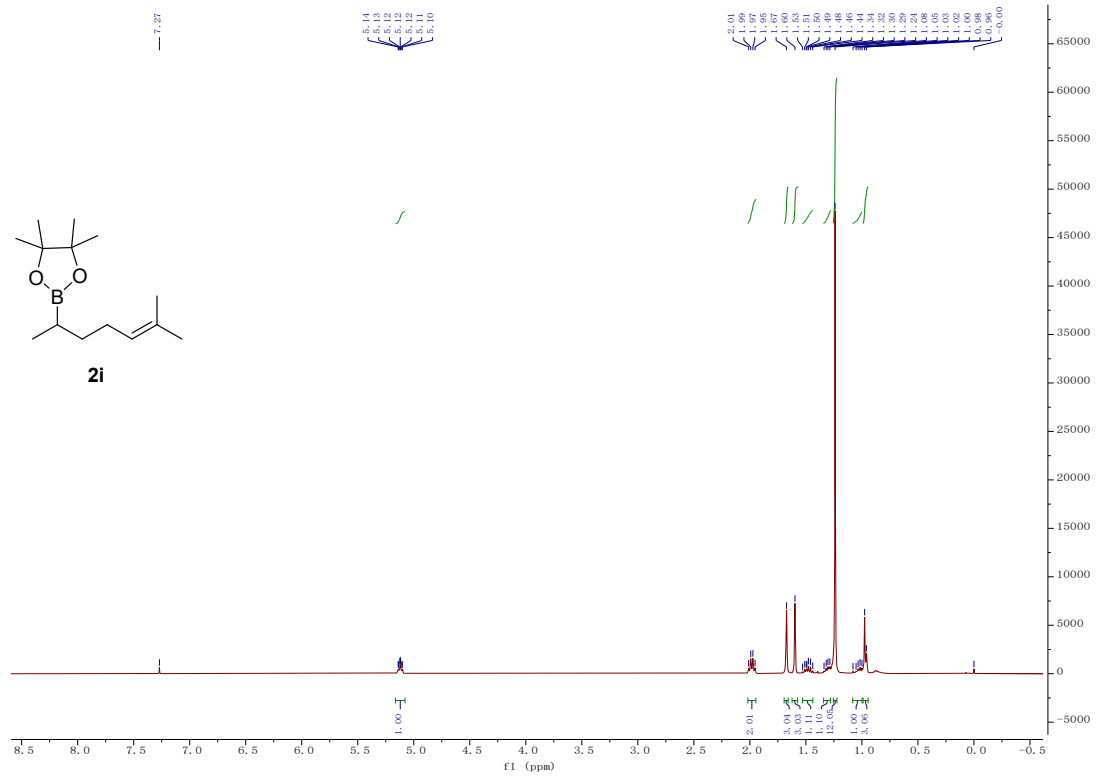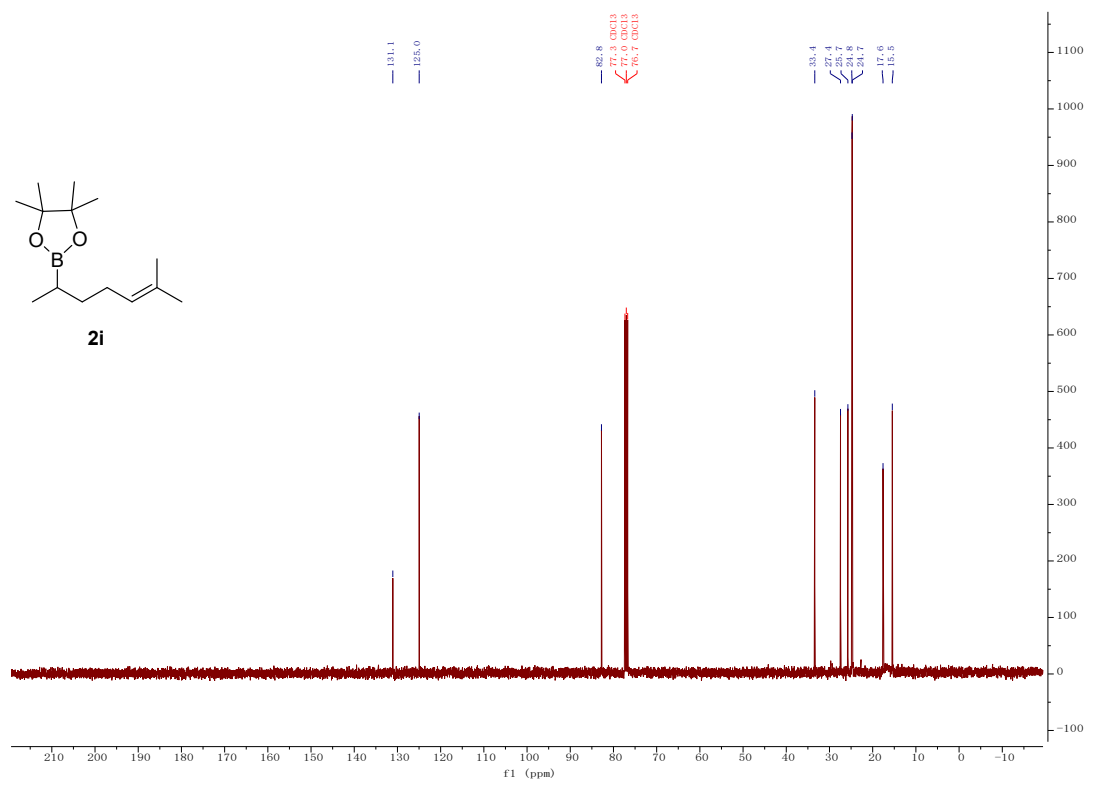



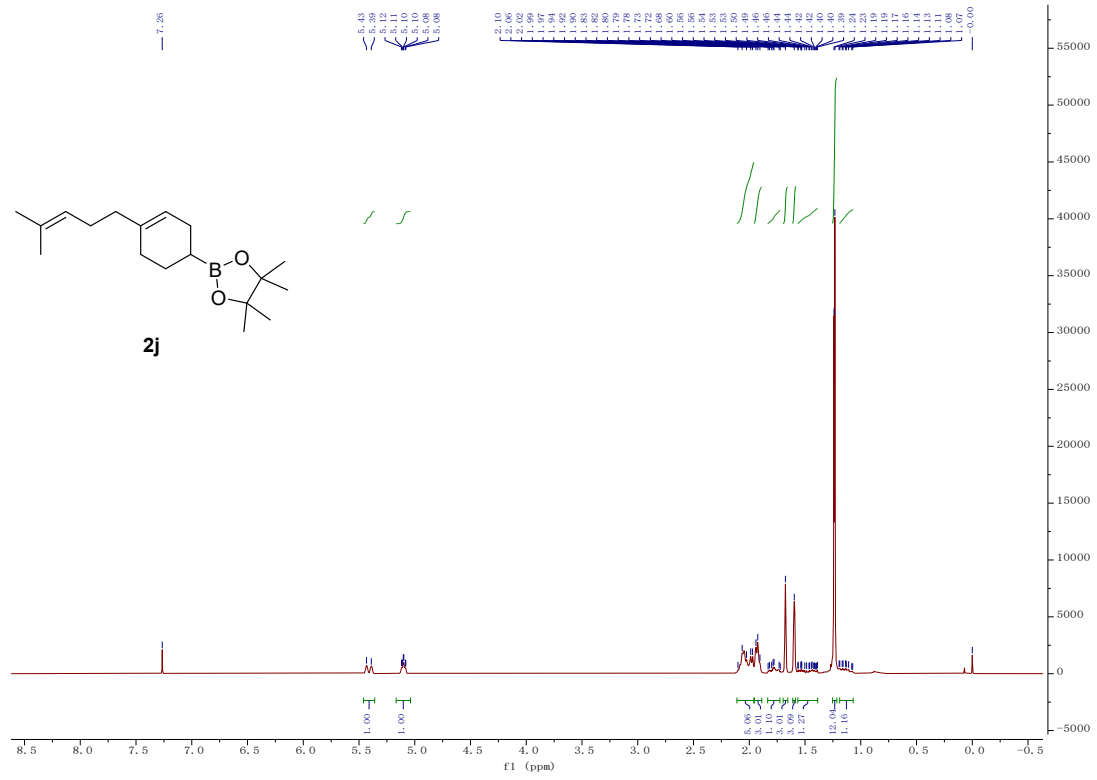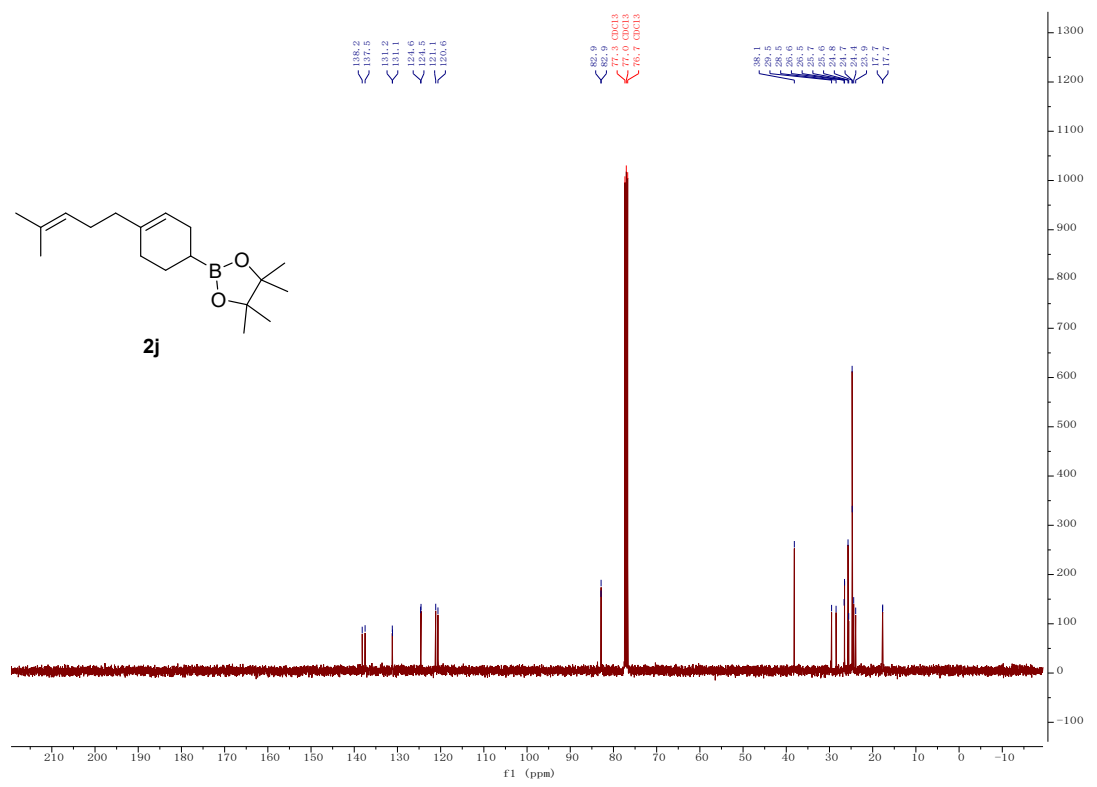



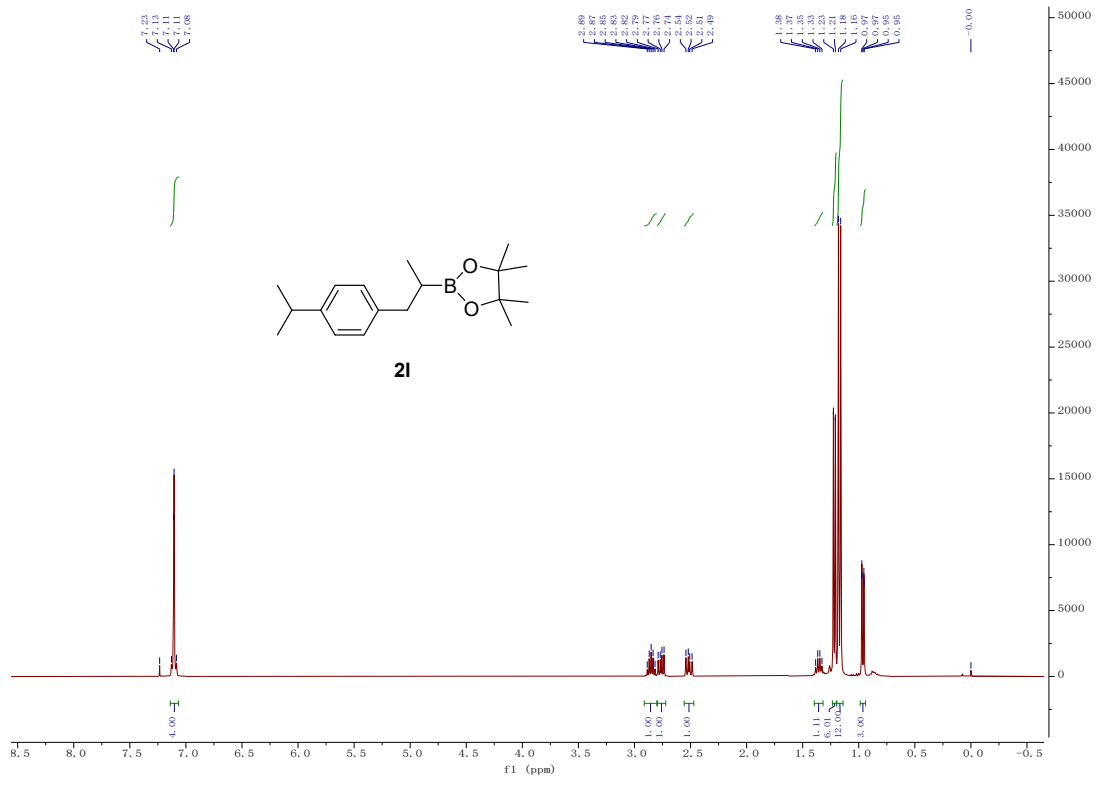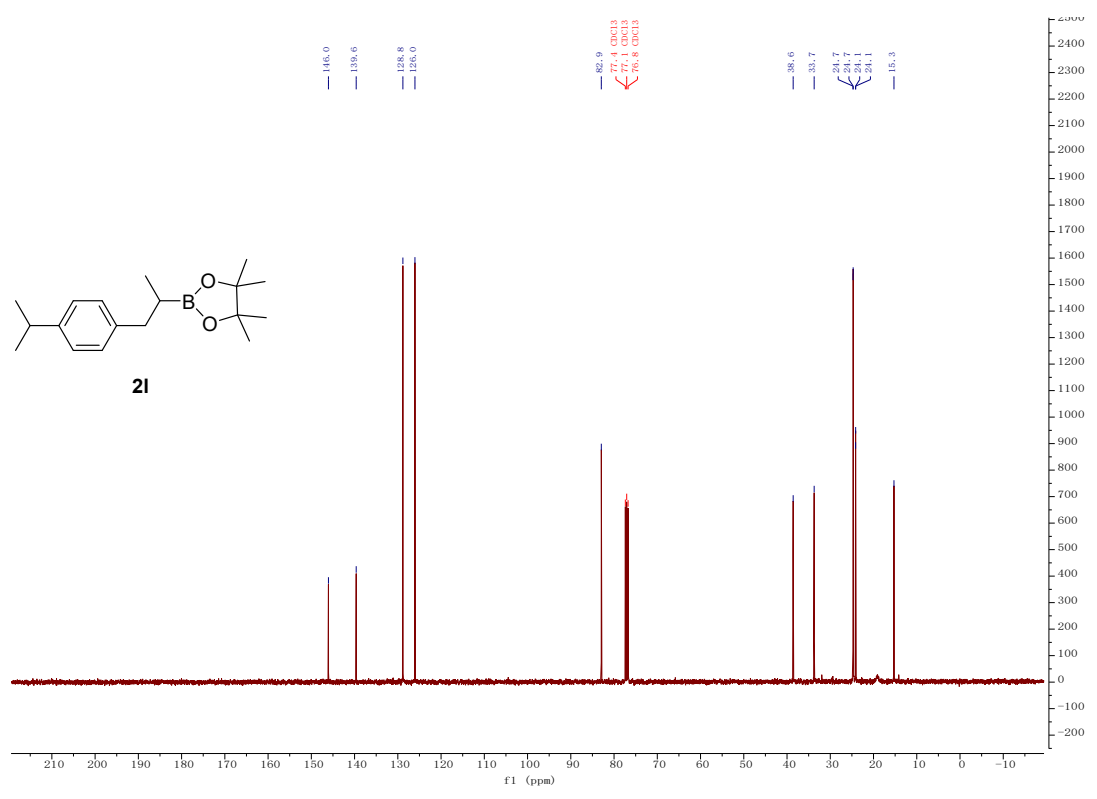

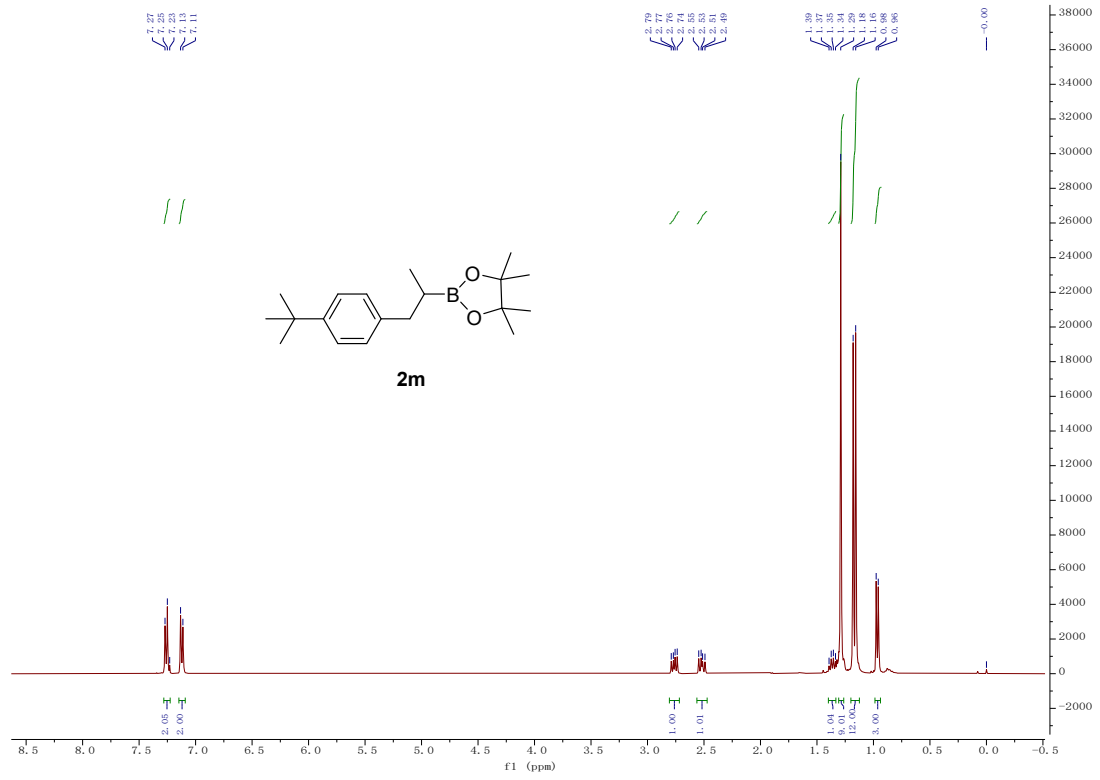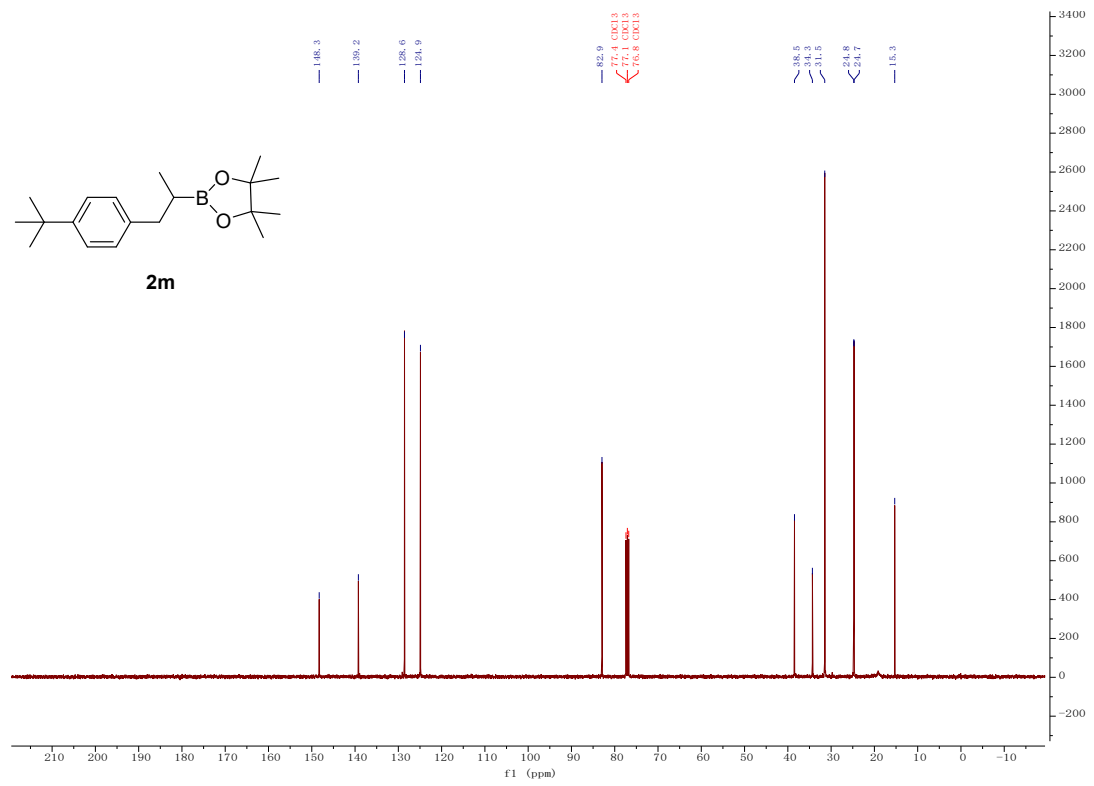

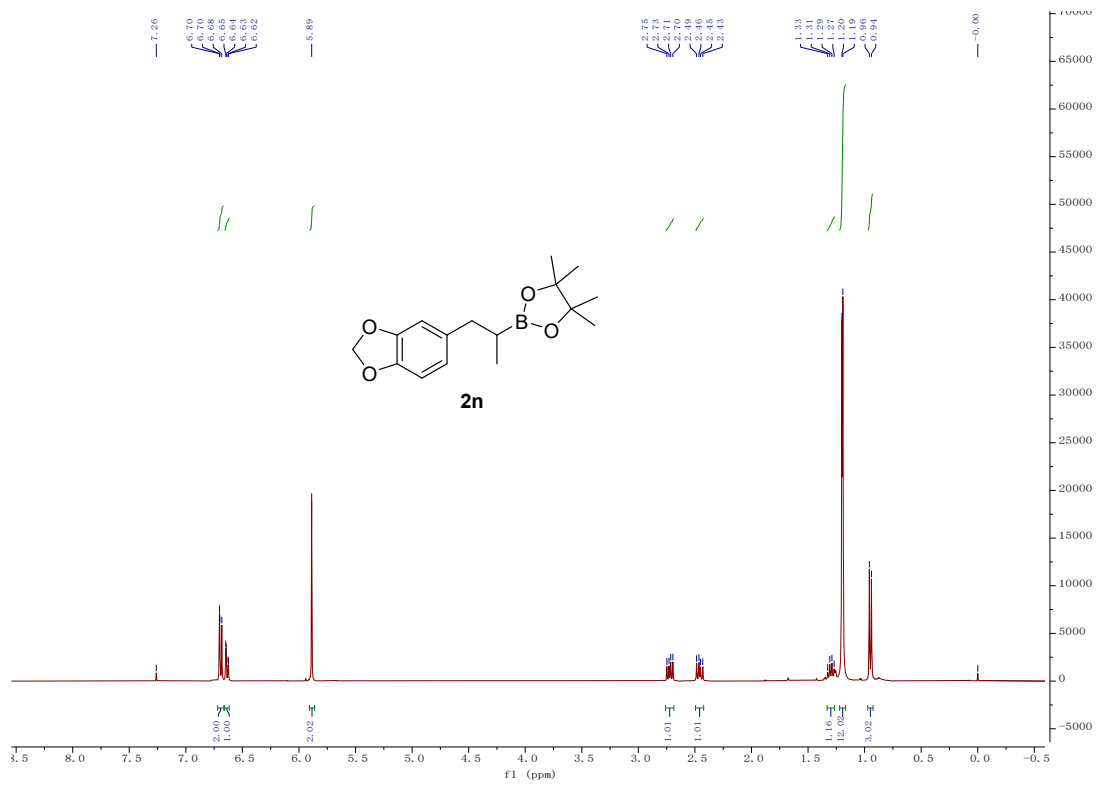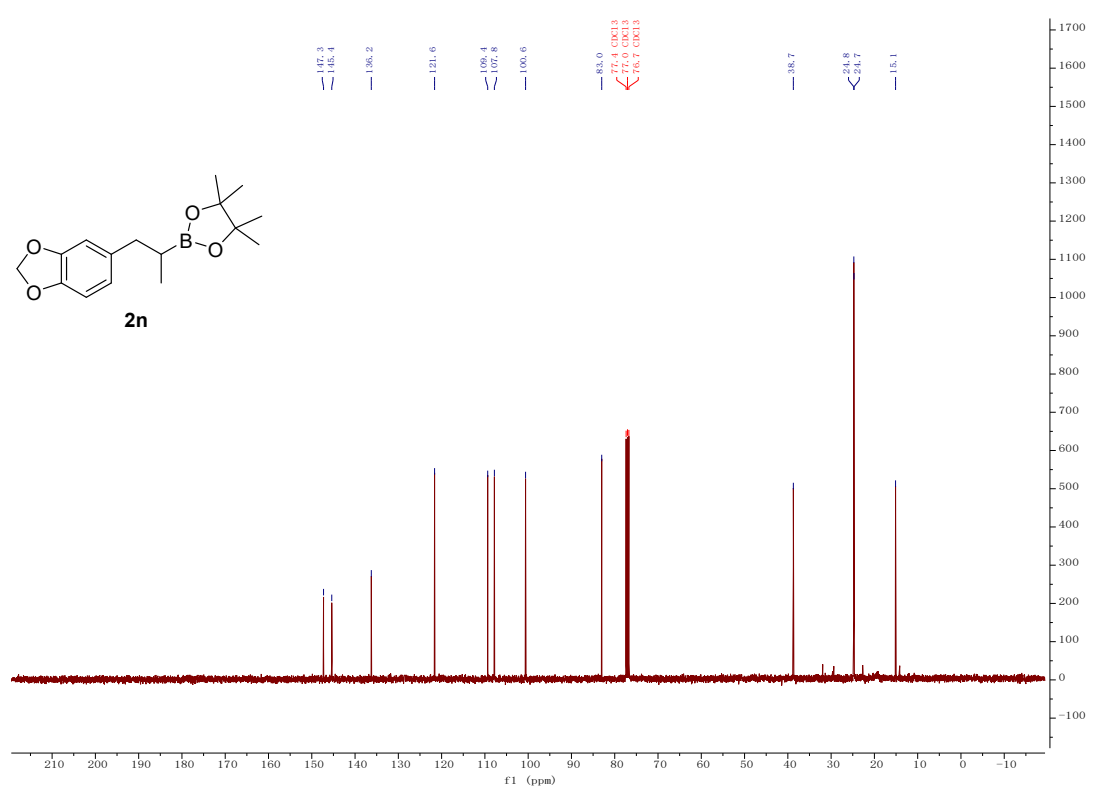





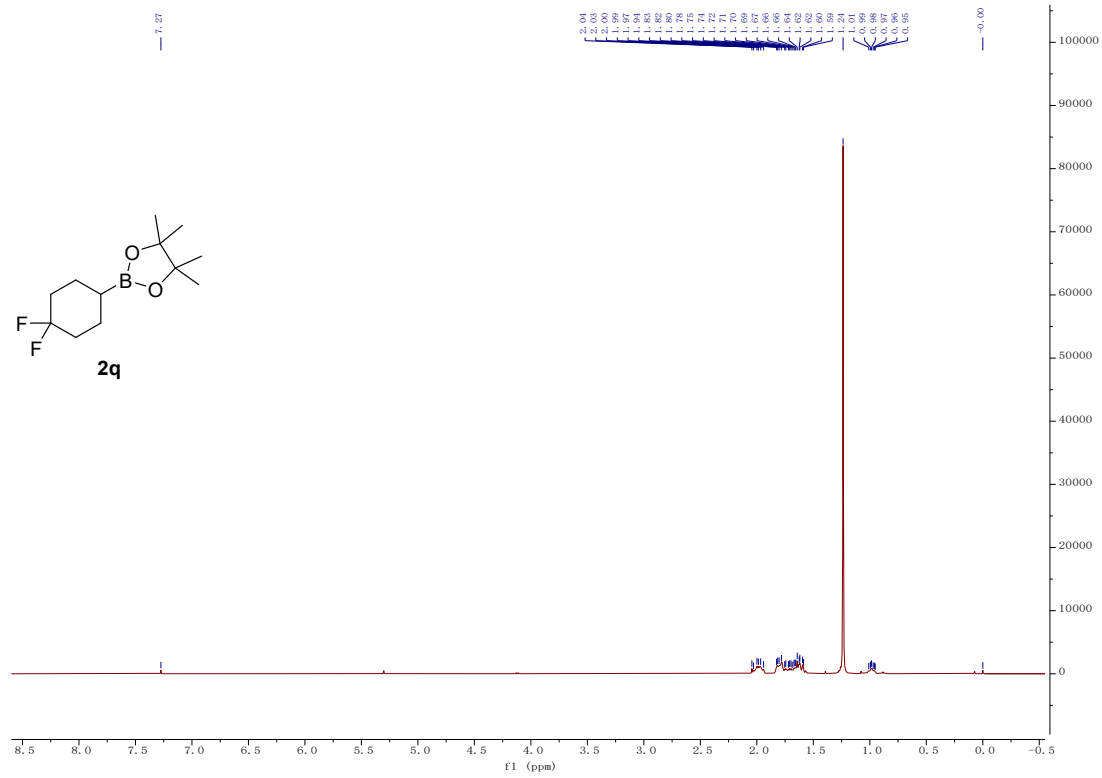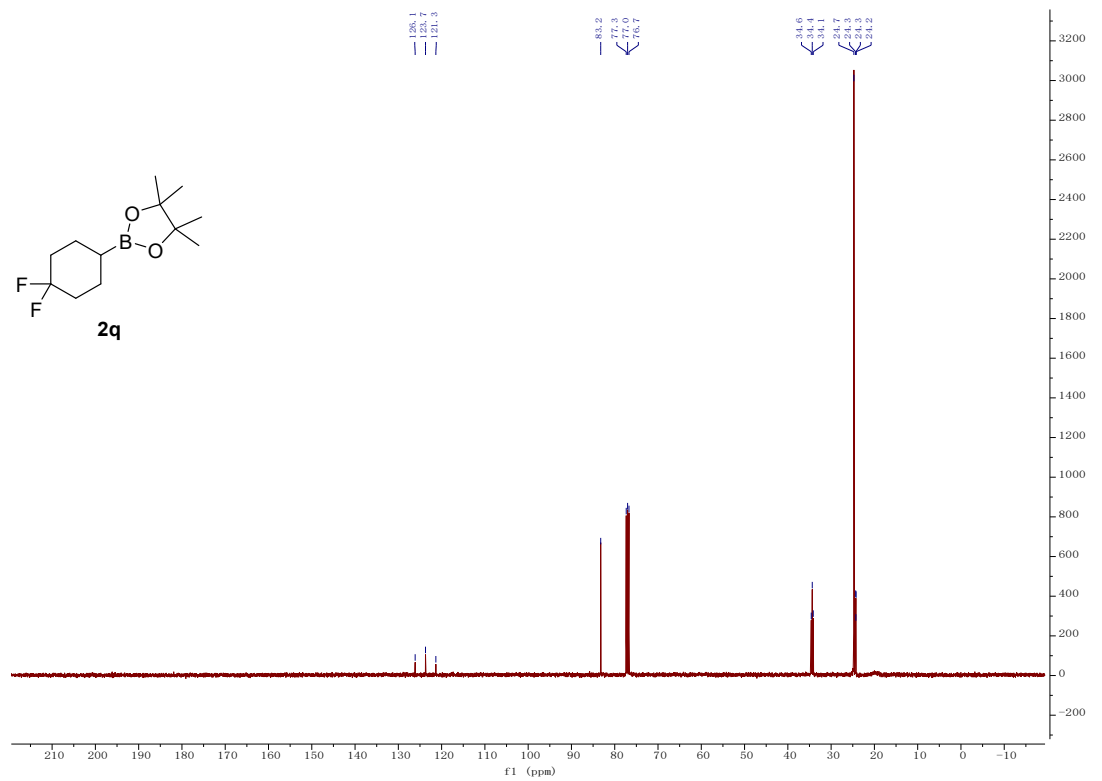



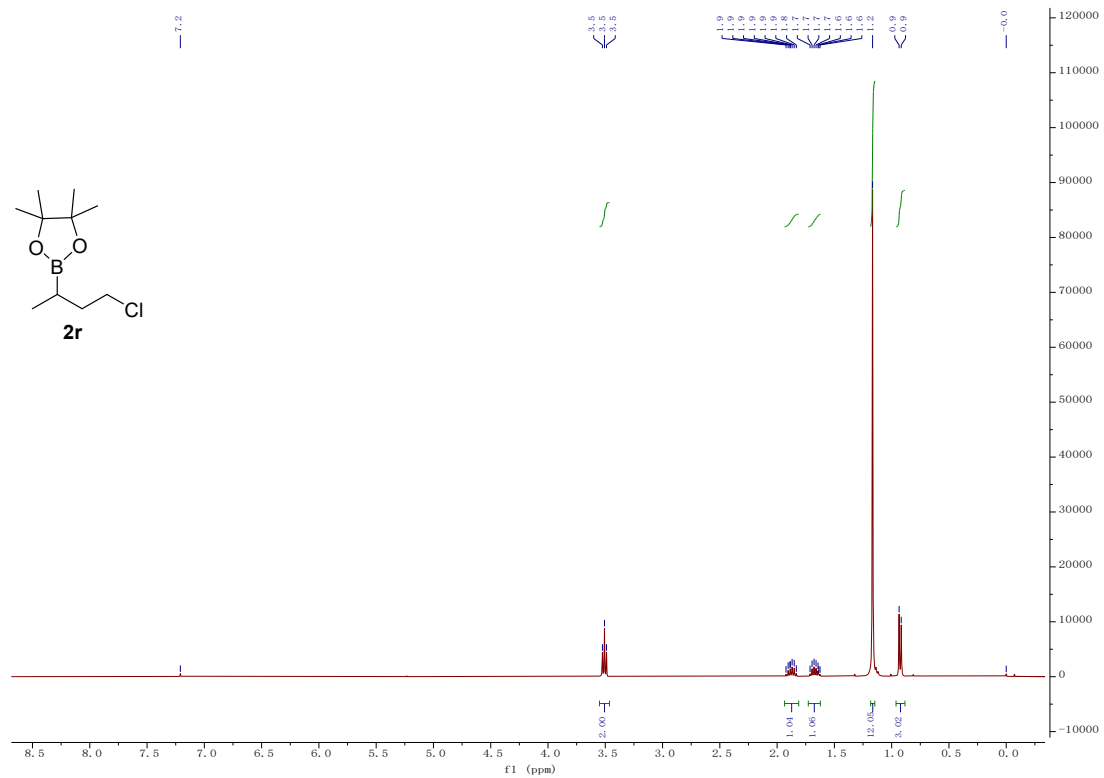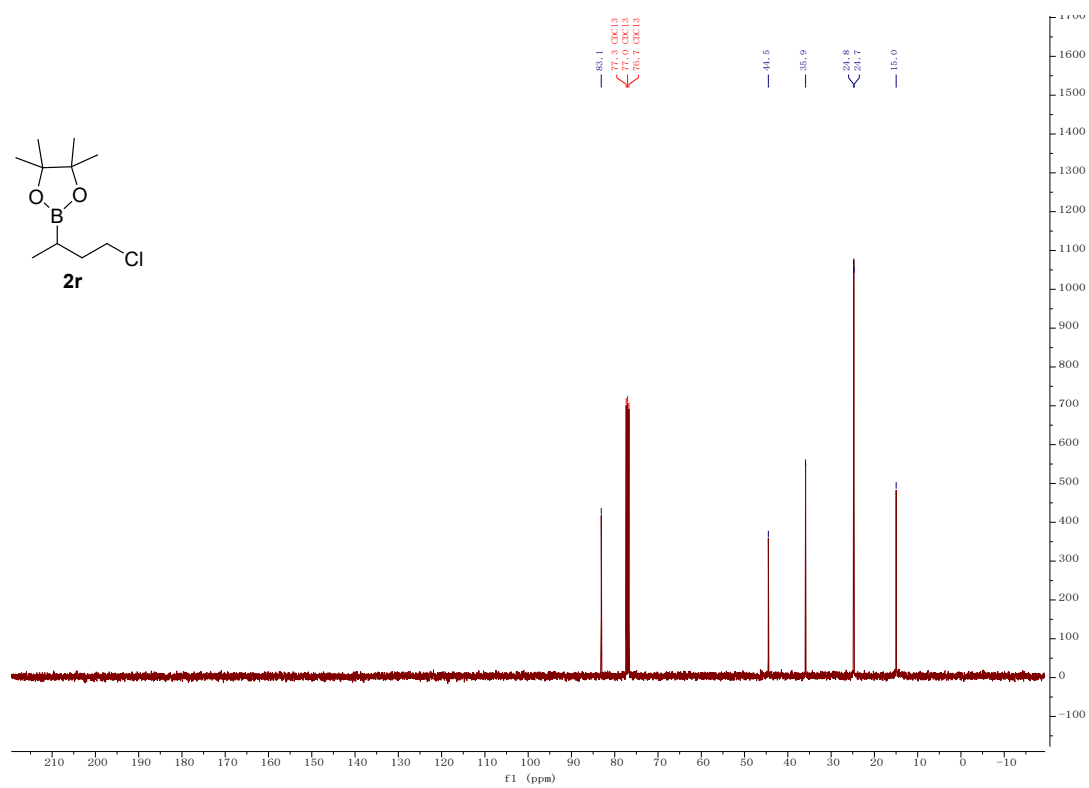

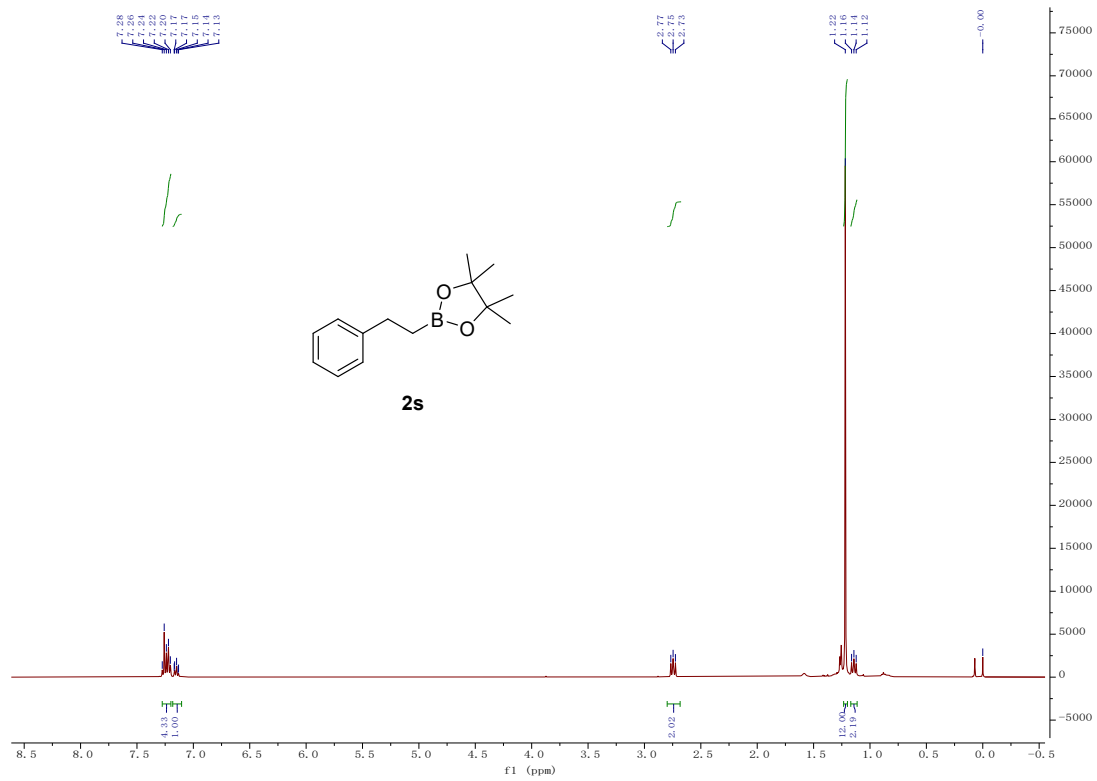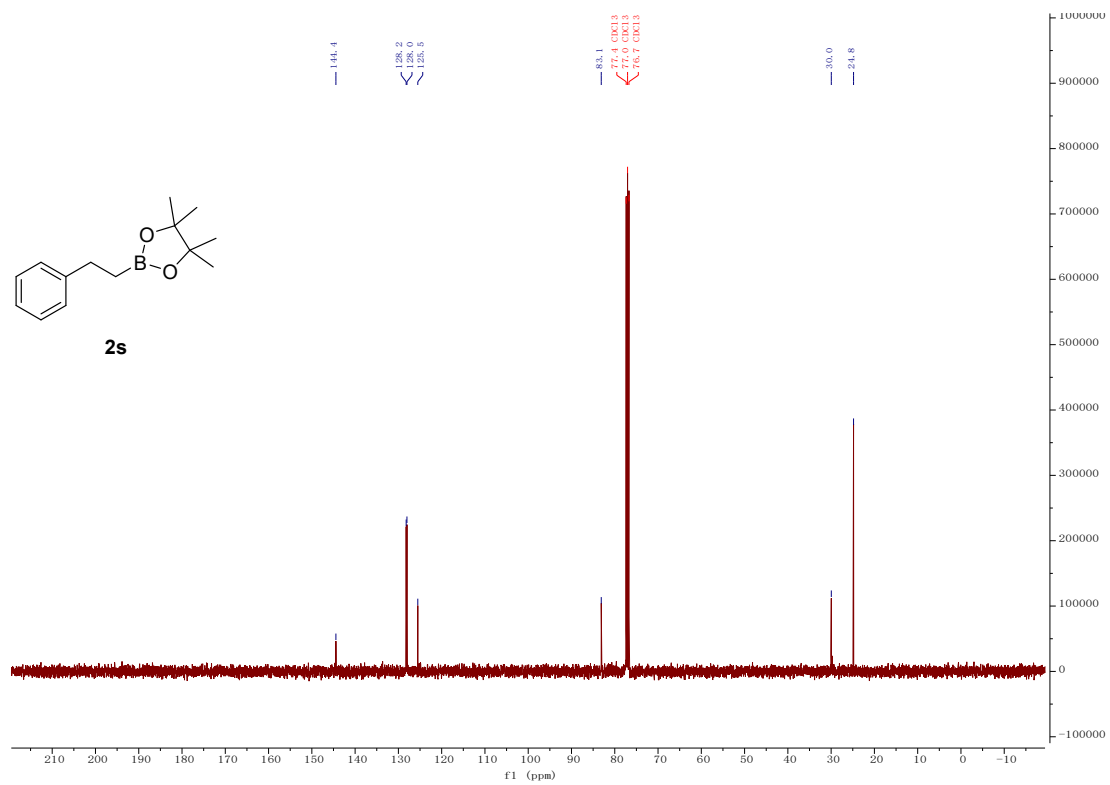

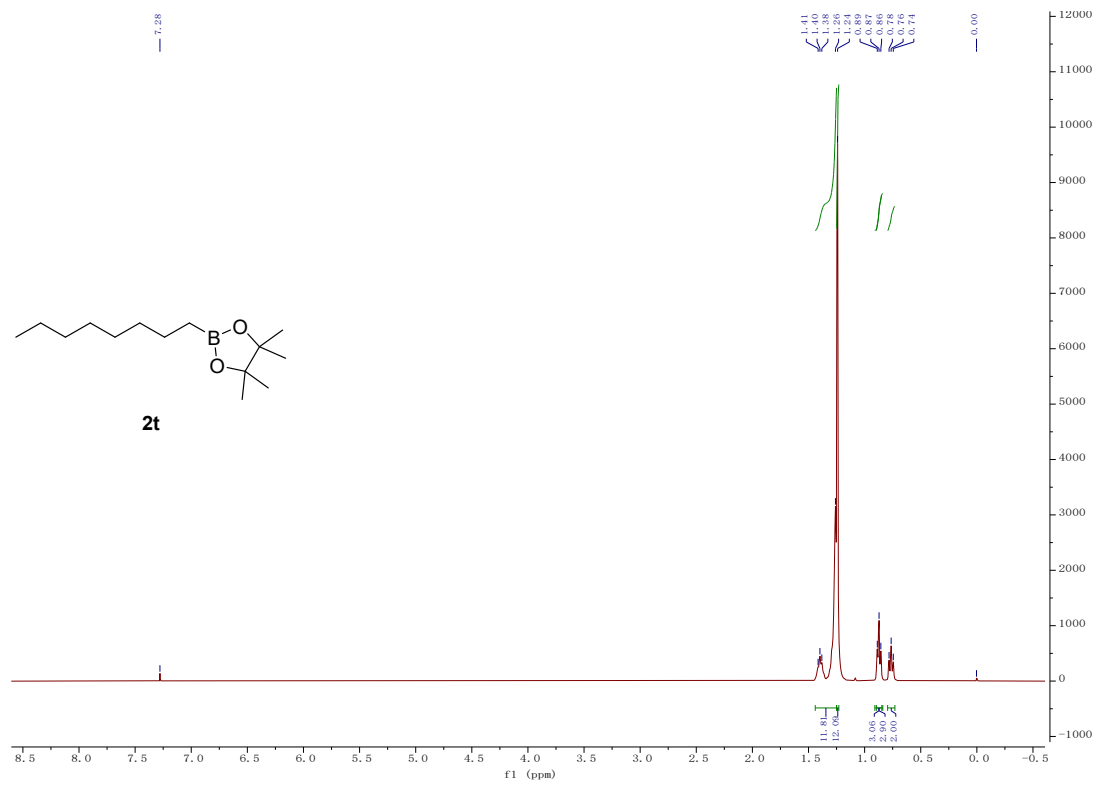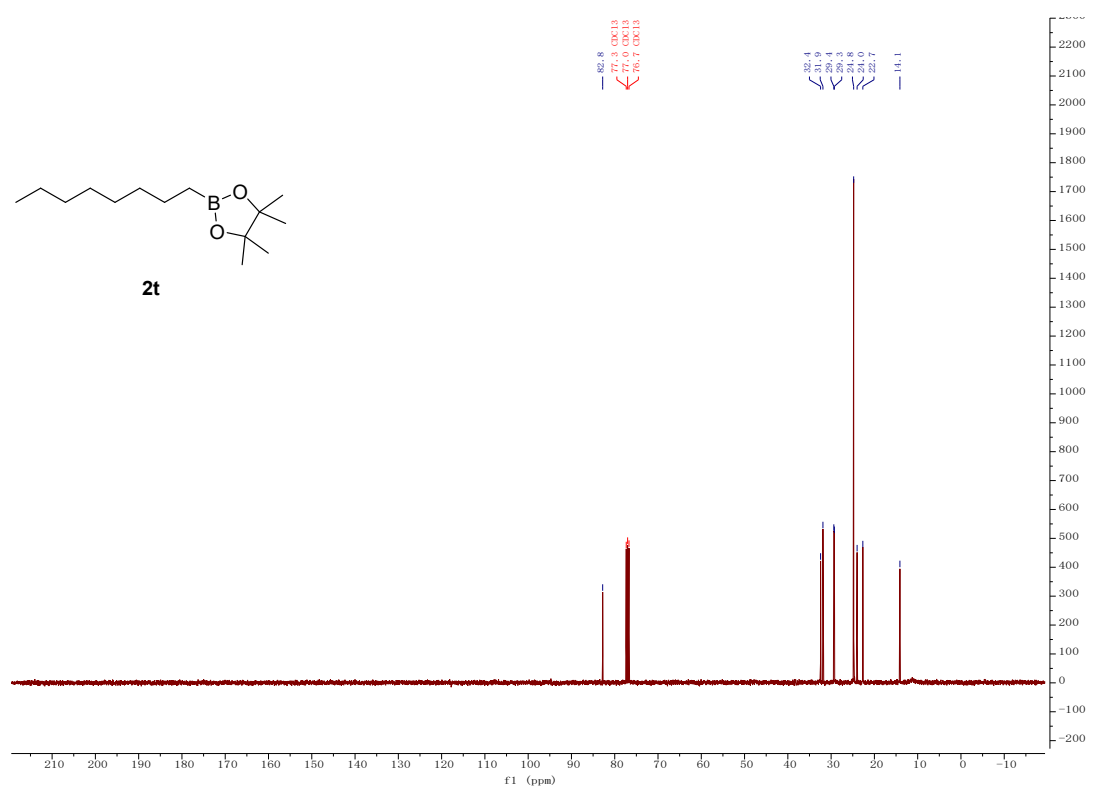

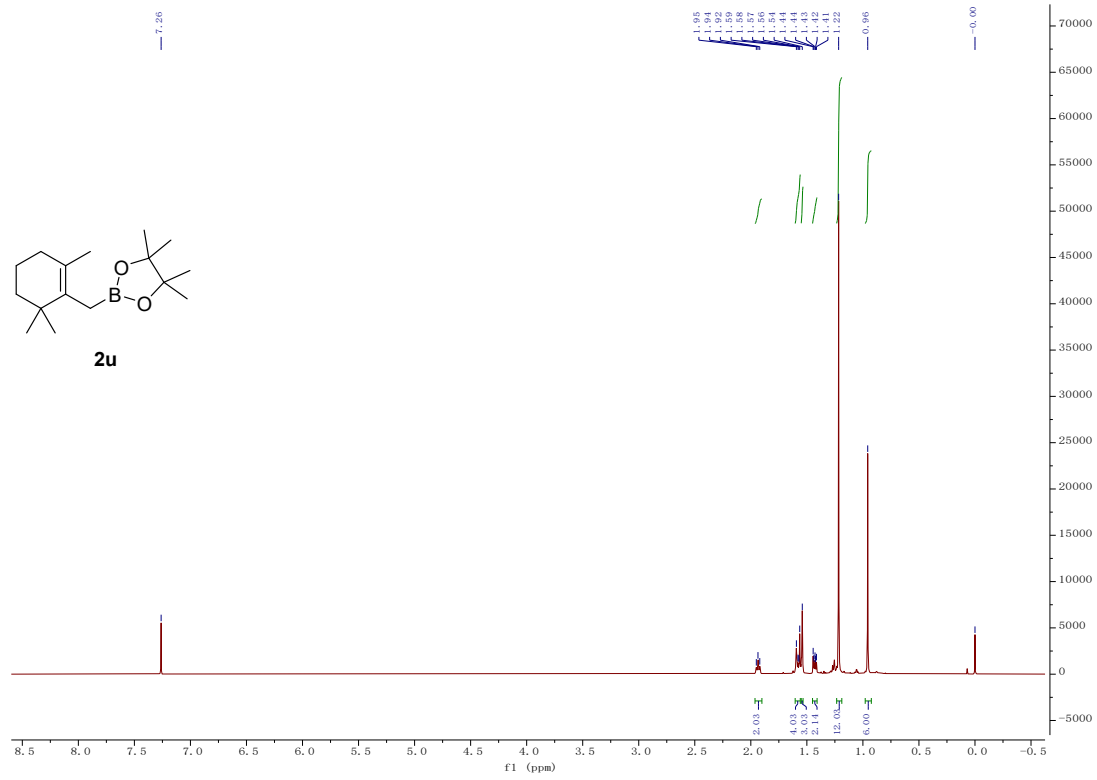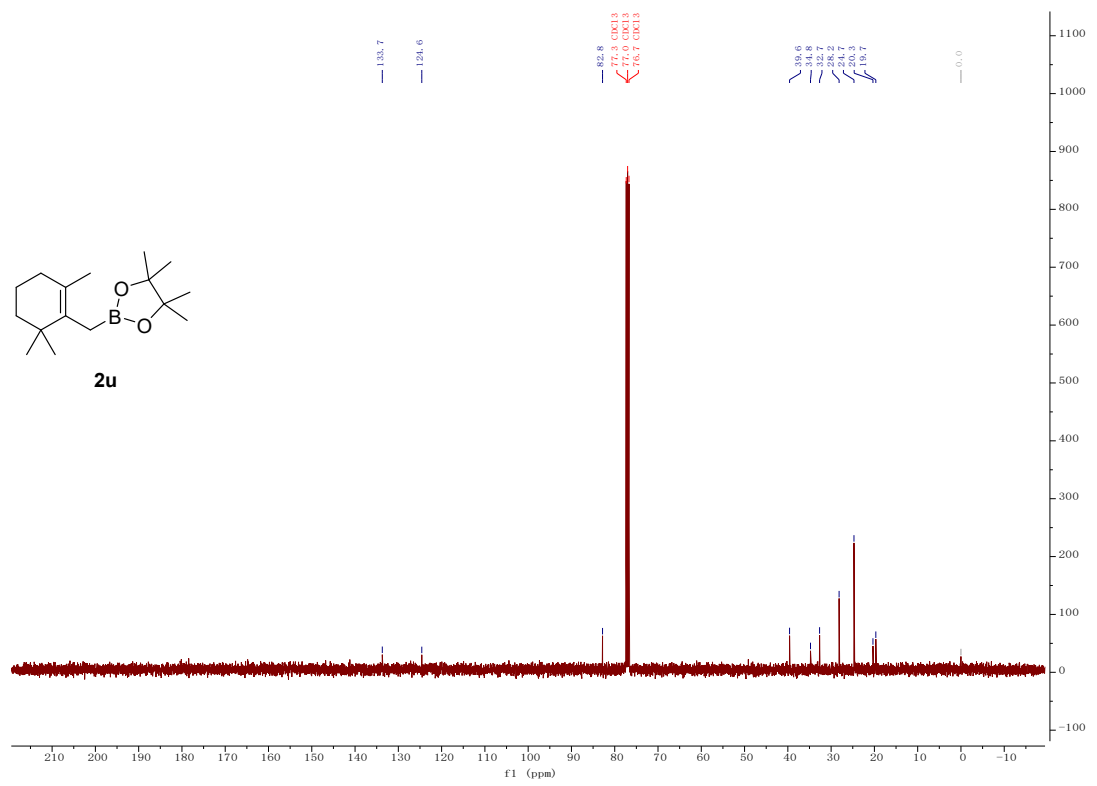

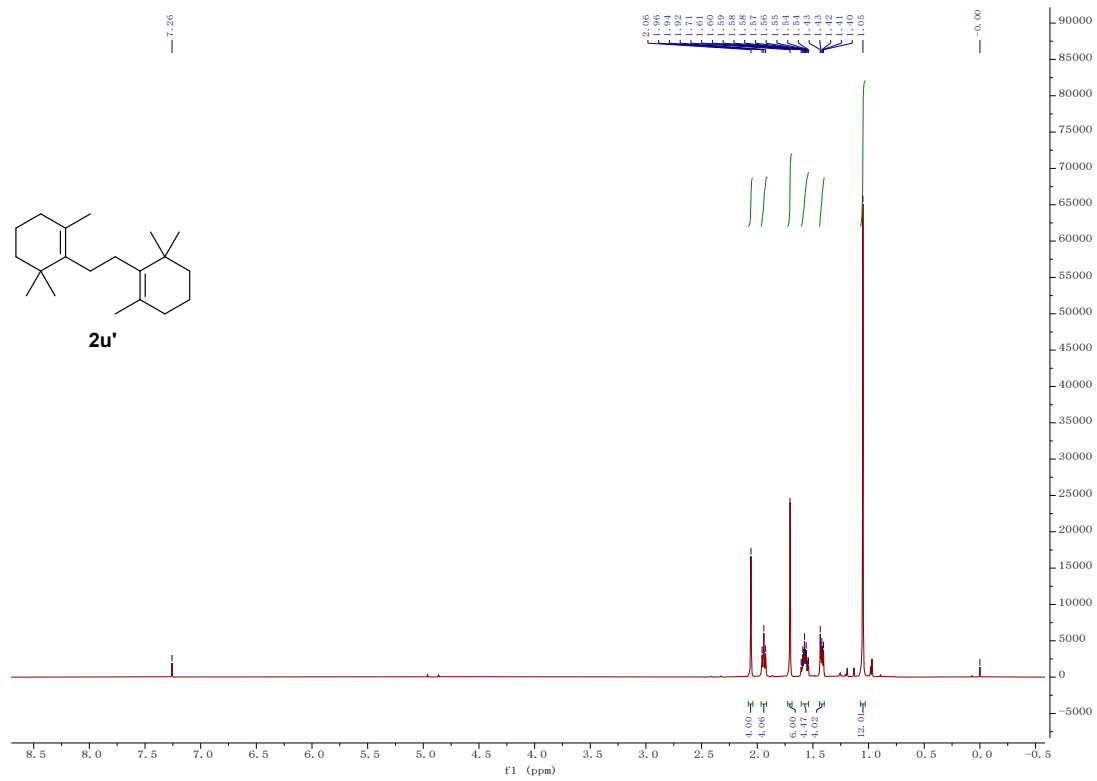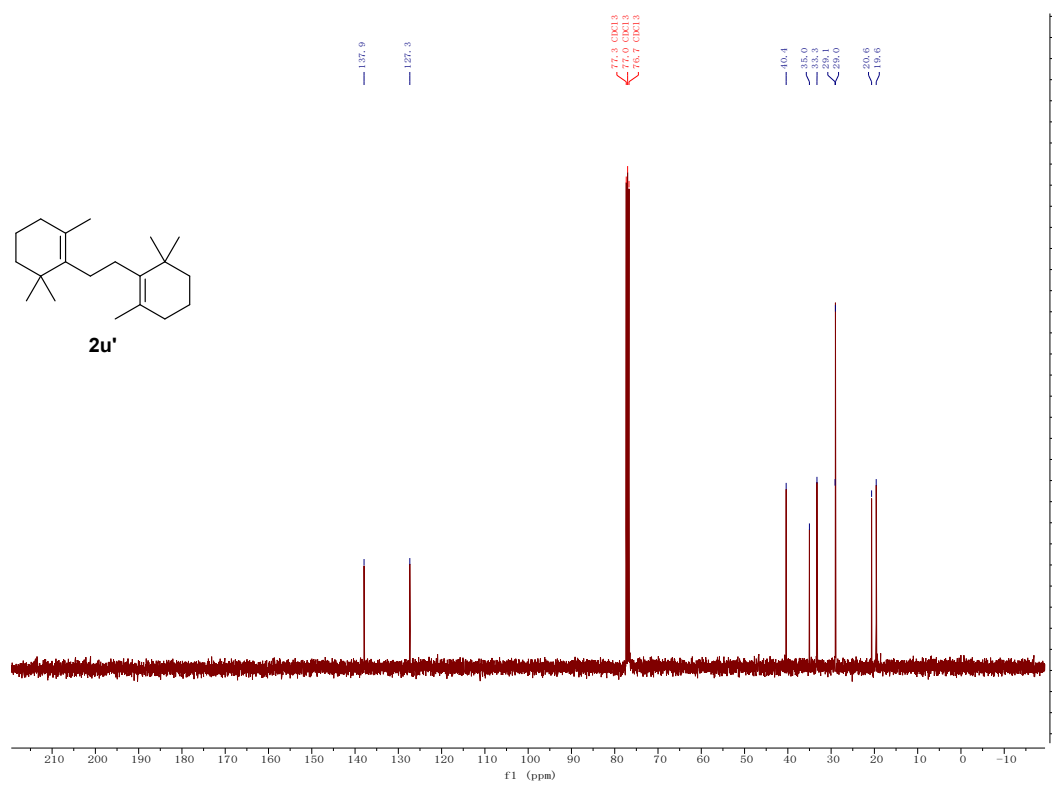

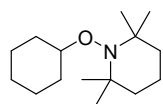

4

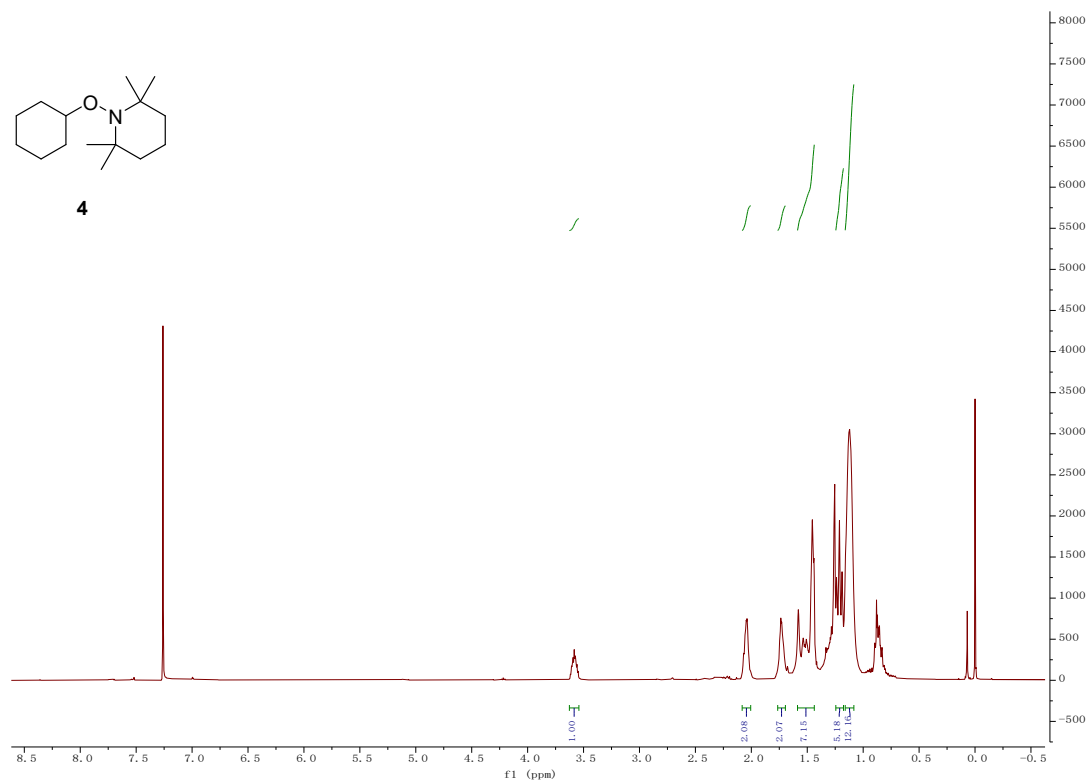

Supplement: d3qo01139a1.pdf [file d3qo01139a1.pdf]
